# Supplementary material for: Asymmetric hydrogenation of α-hydroxy ketones with an iridium/f-amphox catalyst: efficient access to chiral 1,2-diols
Source: Royal Society of Chemistry journal article supplement (doi:10.1039/c6qo00810k), 2017-01-01
Supplement: c6qo00810k1.pdf [file c6qo00810k1.pdf]

## ***Supporting Information***

### **Asymmetric Hydrogenation of $\alpha$ -Hydroxy Ketones with Iridium/f-Amphox Catalyst: Efficient Access to Chiral 1,2-Diols**

Weilong Wu,<sup>†</sup> Yun Xie,<sup>†</sup> Pan Li,<sup>§</sup> Xiuxiu Li,<sup>†</sup> Yuanhua Liu,<sup>†</sup> Xiu-Qin Dong,<sup>\*†</sup> and Xumu Zhang<sup>\*‡†</sup>

<sup>†</sup> College of Chemistry and Molecular Sciences, Wuhan University, Wuhan, Hubei, 430072, P. R. China.

<sup>‡</sup> Department of Chemistry, South University of Science and Technology of China, Shenzhen, Guangdong, 518055, P. R. China.

<sup>§</sup> College of Chemical Engineering, Zhejiang University of Technology, Hangzhou, Zhejiang, 310014, P.R. China.

<sup>\*</sup>Corresponding author. E-mail address: xumu@whu.edu.cn; xiuqindong@whu.edu.cn.

## **Contents**

|                                                         |    |
|---------------------------------------------------------|----|
| I. General Remarks .....                                | 2  |
| II. General procedure for asymmetric hydrogenation..... | 2  |
| III. GC and HPLC spectra.....                           | 9  |
| IV. NMR spectra.....                                    | 47 |
| V. Reference.....                                       | 67 |

## I. General Remarks

All reactions and manipulations which are sensitive to moisture or air were performed in an argon-filled glovebox or using standard Schlenk techniques. Hydrogen gas (99.999%) was purchased from Shanghai Regulator Factory Co., Ltd. Simple ketones, were purchased from Aldrich or Alfa Aesar chemical company, and they were further purified by distilled. Anhydrous THF, 1,4-dioxane and toluene was distilled from sodium benzophenone ketyl. Anhydrous *i*-PrOH, EA, CH<sub>2</sub>Cl<sub>2</sub> were freshly distilled from calcium hydride. Anhydrous MeOH and EtOH were freshly distilled from Mg. Anhydrous CF<sub>3</sub>CH<sub>2</sub>OH were purchased from Sigma-Aldrich. Solvents were transferred by syringe. [Ir(COD)Cl]<sub>2</sub> was prepared according to the literature.<sup>1-2</sup> <sup>1</sup>H, <sup>13</sup>C and <sup>31</sup>P NMR spectra were recorded with a Bruker ADVANCE III (400 MHz) spectrometer with CDCl<sub>3</sub> as the solvent and tetramethylsilane (TMS) as the internal standard. Chemical shifts are reported in parts per million (ppm,  $\delta$  scale) downfield from TMS at 0.00 ppm and referenced to the CDCl<sub>3</sub> at 7.26 ppm (for <sup>1</sup>H NMR) or 77.0 ppm (for <sup>13</sup>C NMR). Data are reported as: multiplicity (s = singlet, d = doublet, t = triplet, q = quartet, m = multiplet), coupling constant in hertz (Hz) and signal area integration in natural numbers. <sup>13</sup>C NMR and <sup>31</sup>P NMR analyses were run with decoupling. Optical rotations [ $\alpha$ ]<sub>D</sub> were determined using a PERKIN ELMER polarimeter 343 instrument. GC analyses were performed using SHIMADZU Lab Solution instrument. HPLC analyses were performed using Daicel chiral column. Aliphatic  $\alpha$ -hydroxy ketones were purchased from Sigma-Aldrich and all the aromatic  $\alpha$ -hydroxy ketones were prepared according the literature.<sup>3-7</sup> The characterization data of compounds **2a-2c**, **2e**, **2j**, **2l**, **2n**, **2o**, **2r** are in accordance with the reported data in the literature.<sup>6</sup> The characterization data of compounds **2d**, **2g**, **2i**, **2q**, **2m** are in accordance with the reported data in the literature.<sup>5, 11</sup> The characterization data of compounds **2f**, **2h**, **2k**, **2p**, **2s** are in accordance with the reported data in the literature.<sup>12-16</sup>

## II. General procedure for asymmetric hydrogenation

General procedure for S/C = 10,000: To a 4.0 mL vial was added the catalyst precursor [Ir(COD)Cl]<sub>2</sub> (1.4 mg, 2.0 $\times$ 10<sup>-3</sup> mmol), ligand **L3** (2.4 mg, 4.2 $\times$ 10<sup>-3</sup> mmol) and anhydrous *i*-PrOH (2.0 mL) under argon atmosphere. The mixture was stirred for 2.0 h at 25 °C giving orange red solution in the argon-filled glovebox. The resulting solution (10  $\mu$ L) and a solution of K<sub>2</sub>CO<sub>3</sub> (10  $\mu$ L, c = 0.02 mmol/mL) transferred by syringe into a 5.0 mL vial charged with fresh distilled substrate ketones (0.2 mmol) in 1.0 mL anhydrous *i*-PrOH. The vials were transferred to an autoclave, which was then charged with 20 atm of H<sub>2</sub> and stirred at room temperature for 2 h. The hydrogen gas was released slowly in a well-ventilated hood and the solution was concentrated and passed through a short column of silica gel to remove the metal complex. The product was analyzed by chiral GC or chiral HPLC for ee values. The characterization data of compounds **2a-2s** are in accordance with the reported data in the literature.<sup>5-10</sup>

(*S*)-1-Phenyl-1,2-ethanediol **2a**

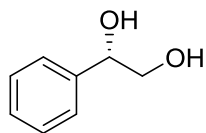

Colorless solid, 27.4 mg, 99% yield; >99% ee;  $[\alpha]_{\text{D}}^{25} = +34.8$  ( $c = 0.50$ , MeOH). The enantiomeric excess was determined by HPLC on Chiralpak OD-H column, hexane: isopropanol = 98:2; flow rate = 1.0 mL/min; UV detection at 220 nm;  $t_{\text{R}}(R) = 33.61$  min (minor),  $t_{\text{R}}(S) = 37.82$  min (major).  $^1\text{H}$  NMR (400 MHz,  $\text{CD}_3\text{OD}$ )  $\delta$  7.36-7.24 (m, 4H), 7.23-7.17 (m, 1H), 4.64 (dd,  $J = 7.1, 5.0$  Hz, 1H), 3.57 (dd,  $J = 6.1, 2.6$  Hz, 2H);  $^{13}\text{C}$  NMR (101 MHz,  $\text{CD}_3\text{OD}$ )  $\delta$  141.91, 127.88, 127.15, 126.03, 74.59, 67.39.

(*S*)-1-(2-Methylphenyl)-1,2-ethanediol **2b**

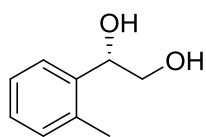

Colorless solid, 30.1 mg, 99% yield; 99% ee;  $[\alpha]_{\text{D}}^{25} = +33.4$  ( $c = 0.35$ ,  $\text{CHCl}_3$ ). The enantiomeric excess was determined by HPLC on Chiralpak OD-H column, hexane: isopropanol = 98:2; flow rate = 1.0 mL/min; UV detection at 220 nm;  $t_{\text{R}}(R) = 29.23$  min (minor),  $t_{\text{R}}(S) = 39.62$  min (major).  $^1\text{H}$  NMR (400 MHz,  $d\text{-DMSO}$ )  $\delta$  7.40 (d,  $J = 4.0$  Hz, 1H), 7.19-7.06 (m, 3H), 5.14 (d,  $J = 4.0$  Hz, 1H), 4.76-4.74 (m, 1H), 3.39 (dt,  $J = 9.4, 3.8$  Hz, 1H), 3.34-3.30 (m, 1H), 2.28 (s, 3H);  $^{13}\text{C}$  NMR (101 MHz,  $d\text{-DMSO}$ )  $\delta$  141.84, 134.84, 130.16, 126.99, 126.46, 126.06, 71.0, 67.04, 19.28.

(*S*)-1-(4-Methylphenyl)-1,2-ethanediol **2c**

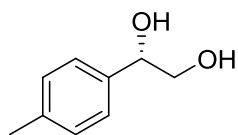

Colorless solid, 30.1 mg, 99% yield; >99% ee;  $[\alpha]_{\text{D}}^{25} = +57.8$  ( $c = 0.225$ ,  $\text{CHCl}_3$ ). The enantiomeric excess was determined by HPLC on Chiralpak OD-H column, hexane: isopropanol = 98:2; flow rate = 1.0 mL/min; UV detection at 210 nm;  $t_{\text{R}}(R) = 29.15$  min (minor),  $t_{\text{R}}(S) = 33.59$  min (major).  $^1\text{H}$  NMR (400 MHz,  $\text{CD}_3\text{OD}$ )  $\delta$  7.26 (d,  $J = 8.0$  Hz, 2H), 7.16 (d,  $J = 8.0$  Hz, 2H), 4.70-4.62 (m, 1H), 3.64-3.57 (m, 2H), 2.33 (s, 3H).  $^{13}\text{C}$  NMR (101 MHz,  $\text{CD}_3\text{OD}$ )  $\delta$  138.82, 136.85, 128.48, 125.97, 74.45, 67.38, 19.79.

(*S*)-1-(4-Methoxyphenyl)-1,2-ethanediol **2d**

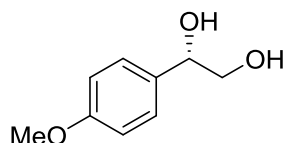

Colorless solid, 33.3 mg, 99% yield; >99% ee;  $[\alpha]_{\text{D}}^{25} = +63.8$  ( $c = 0.24$ ,  $\text{CHCl}_3$ ). The enantiomeric excess was determined by HPLC on Chiralpak OD-H column, hexane: isopropanol = 98:2; flow rate

= 1.0 mL/min; UV detection at 220 nm;  $t_R(R)$  = 50.37 min (minor),  $t_R(S)$  = 58.49 min (major).  $^1\text{H}$  NMR (400 MHz,  $\text{CD}_3\text{OD}$ )  $\delta$  7.18 (d,  $J$  = 8.0 Hz, 2H), 6.78 (d,  $J$  = 8.0 Hz, 2H), 4.52 (t,  $J$  = 6.1 Hz, 1H), 3.67 (s, 3H), 3.48 (d,  $J$  = 8.0 Hz, 2H).  $^{13}\text{C}$  NMR (101 MHz,  $\text{CD}_3\text{OD}$ )  $\delta$  159.25, 133.88, 127.21, 113.24, 74.16, 67.31, 54.25.

(*S*)-1-(4-Ethylphenyl)-1,2-ethanediol **2e**

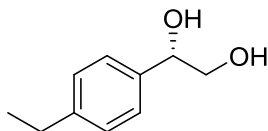

Colorless solid, 32.9 mg, 99% yield; >99% ee;  $[\alpha]_D^{25}$  = +20.2 ( $c$  = 0.50, MeOH). The enantiomeric excess was determined by HPLC on Chiralpak OD-H column, hexane: isopropanol = 98:2; flow rate = 1.0 mL/min; UV detection at 220 nm;  $t_R(R)$  = 26.75 min (minor),  $t_R(S)$  = 30.13 min (major).  $^1\text{H}$  NMR (400 MHz,  $\text{CDCl}_3$ )  $\delta$  7.29 (d,  $J$  = 8.1 Hz, 2H), 7.20 (d,  $J$  = 8.1 Hz, 2H), 4.80 (dd,  $J$  = 8.0, 3.4 Hz, 1H), 3.80-3.59 (m, 2H), 2.65 (q,  $J$  = 7.6 Hz, 2H), 2.54 (brs, 1H), 2.17 (brs, 1H), 1.24 (t,  $J$  = 8.0 Hz, 3H).  $^{13}\text{C}$  NMR (101 MHz,  $\text{CDCl}_3$ )  $\delta$  144.22, 137.74, 128.10, 126.12, 74.60, 68.10, 28.58, 15.62.

(*S*)-1-(3-Fluorophenyl)-1,2-ethanediol **2f**

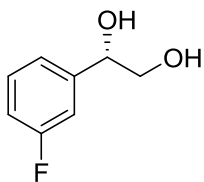

Colorless solid, 30.9 mg, 99% yield; >99% ee;  $[\alpha]_D^{25}$  = +19.2 ( $c$  = 0.50, MeOH). The enantiomeric excess was determined by HPLC on Chiralpak OD-H column, hexane: isopropanol = 98:2; flow rate = 1.0 mL/min; UV detection at 220 nm;  $t_R(R)$  = 28.39 min (minor),  $t_R(S)$  = 32.53 min (major).  $^1\text{H}$  NMR (400 MHz,  $\text{CDCl}_3$ )  $\delta$  7.34-7.29 (m, 1H), 7.12-7.08 (m, 2H), 7.01-6.96 (m, 1H), 4.81 (dd,  $J$  = 8.1, 3.2 Hz, 1H), 3.77-3.74 (m, 1H), 3.64-3.59 (m, 1H), 3.07 (brs, 1H), 2.54 (brs, 1H).  $^{13}\text{C}$  NMR (101 MHz,  $\text{CDCl}_3$ )  $\delta$  162.97 (d,  $J$  = 246.3 Hz), 143.11 (d,  $J$  = 6.9 Hz), 130.10 (d,  $J$  = 8.1 Hz), 121.62 (d,  $J$  = 2.9 Hz), 114.85 (d,  $J$  = 21.1 Hz), 113.08 (d,  $J$  = 22.1 Hz), 74.04 (d,  $J$  = 1.6 Hz), 67.90.

(*S*)-1-(4-Fluorophenyl)-1,2-ethanediol **2g**

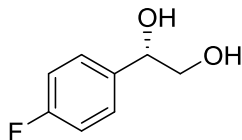

Colorless solid, 30.9 mg, 99% yield; >99% ee;  $[\alpha]_D^{25}$  = +56.4 ( $c$  = 0.225,  $\text{CHCl}_3$ ). The enantiomeric excess was determined by HPLC on Chiralpak OD-H column, hexane: isopropanol = 98:2; flow rate = 1.0 mL/min; UV detection at 210 nm;  $t_R(R)$  = 31.60 min (minor),  $t_R(S)$  = 35.53 min (major).  $^1\text{H}$  NMR (400 MHz,  $\text{CD}_3\text{OD}$ )  $\delta$  7.30-7.26 (m, 2H), 6.97-6.93 (m, 2H), 4.57 (t,  $J$  = 8.0 Hz, 1H), 3.50-3.48 (m, 2H).  $^{13}\text{C}$  NMR (101 MHz,

CD<sub>3</sub>OD)  $\delta$  162.24 (d,  $J$  = 243.6 Hz), 138.05 (d,  $J$  = 3.0 Hz), 127.87 (d,  $J$  = 8.1 Hz), 114.44 (d,  $J$  = 21.5 Hz), 73.79, 67.23.

(*S*)-1-(2-Chlorophenyl)-1,2-ethanediol **2h**

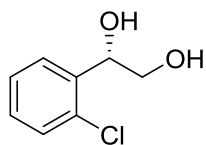

Colorless solid, 34.2 mg, 99% yield; 95% ee;  $[\alpha]_D^{25}$  = +32.4 ( $c$  = 0.50, MeOH). The enantiomeric excess was determined by HPLC on Chiralpak OD-H column, hexane: isopropanol = 98:2; flow rate = 1.0 mL/min; UV detection at 205 nm;  $t_R(R)$  = 24.34 min (minor),  $t_R(S)$  = 33.78 min (major). <sup>1</sup>H NMR (400 MHz, d-DMSO)  $\delta$  7.58-7.55 (m, 1H), 7.41-7.30 (m, 2H), 7.29-7.26 (m, 1H), 5.47 (d,  $J$  = 4.0 Hz, 1H), 4.92-4.87 (m, 1H), 3.51-3.47 (m, 1H), 3.36-3.26 (m, 1H). <sup>13</sup>C NMR (101 MHz, d-DMSO)  $\delta$  140.82, 131.52, 129.26, 128.99, 128.80, 127.50, 71.02, 66.09.

(*S*)-1-(3-Chlorophenyl)-1,2-ethanediol **2i**

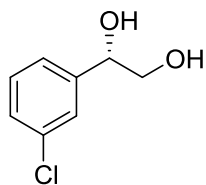

Colorless solid, 34.2 mg, 99% yield; >99% ee;  $[\alpha]_D^{25}$  = +50.8 ( $c$  = 0.24, CHCl<sub>3</sub>). The enantiomeric excess was determined by HPLC on Chiralpak OD-H column, hexane: isopropanol = 98:2; flow rate = 1.0 mL/min; UV detection at 220 nm;  $t_R(R)$  = 33.02 min (minor),  $t_R(S)$  = 39.22 min (major). <sup>1</sup>H NMR (400 MHz, CD<sub>3</sub>OD)  $\delta$  7.43 (s, 1H), 7.38-7.21 (m, 3H), 4.70-4.67 (m, 1H), 3.63-3.61 (m, 2H). <sup>13</sup>C NMR (101 MHz, CD<sub>3</sub>OD)  $\delta$  144.61, 133.77, 129.37, 127.07, 126.11, 124.46, 73.76, 67.10.

(*S*)-1-(4-Chlorophenyl)-1,2-ethanediol **2j**

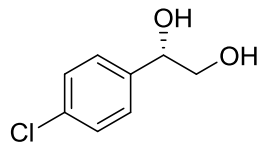

Colorless solid, 34.2 mg, 99% yield; >99% ee;  $[\alpha]_D^{25}$  = +11.8 ( $c$  = 0.50, MeOH). The enantiomeric excess was determined by HPLC on Chiralpak OD-H column, hexane: isopropanol = 98:2; flow rate = 1.0 mL/min; UV detection at 220 nm;  $t_R(R)$  = 33.41 min (minor),  $t_R(S)$  = 37.63 min (major). <sup>1</sup>H NMR (400 MHz, CD<sub>3</sub>OD)  $\delta$  7.36-7.25 (m, 4H), 4.64-4.61 (m, 1H), 3.59-3.51 (m, 2H). <sup>13</sup>C NMR (101 MHz, CD<sub>3</sub>OD)  $\delta$  140.91, 132.72, 127.89, 127.68, 73.75, 67.11.

(*S*)-1-(3-Bromophenyl)-1,2-ethanediol **2k**

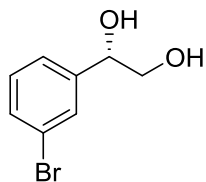

Colorless solid, 42.9 mg, 99% yield; >99% ee;  $[\alpha]_{\text{D}}^{25} = +14.8$  ( $c = 0.50$ , MeOH). The enantiomeric excess was determined by HPLC on Chiralpak OD-H column, hexane: isopropanol = 98:2; flow rate = 1.0 mL/min; UV detection at 210 nm;  $t_{\text{R}}(R) = 37.16$  min (minor),  $t_{\text{R}}(S) = 45.84$  min (major).  $^1\text{H}$  NMR (400 MHz,  $d\text{-DMSO}$ )  $\delta$  7.53 (t,  $J = 1.7$  Hz, 1H), 7.42 (ddd,  $J = 7.8, 2.0, 1.2$  Hz, 1H), 7.36-7.32 (m, 1H), 7.27 (t,  $J = 7.7$  Hz, 1H), 5.42 (brs, 1H), 4.80 (brs, 1H), 4.54 (t,  $J = 5.8$  Hz, 1H), 3.53-3.44 (m, 1H), 3.43-3.40 (m, 1H).  $^{13}\text{C}$  NMR (101 MHz,  $d\text{-DMSO}$ )  $\delta$  146.93, 130.50, 130.04, 129.52, 125.92, 121.80, 73.47, 67.55.

(*S*)-1-(4-Bromophenyl)-1,2-ethanediol **2l**

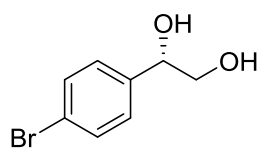

Colorless solid, 42.6 mg, 98% yield; >99% ee;  $[\alpha]_{\text{D}}^{25} = +31.8$  ( $c = 0.50$ ,  $\text{CHCl}_3$ ). The enantiomeric excess was determined by HPLC on Chiralpak OD-H column, hexane: isopropanol = 98:2; flow rate = 1.0 mL/min; UV detection at 220 nm;  $t_{\text{R}}(R) = 39.54$  min (minor),  $t_{\text{R}}(S) = 42.78$  min (major).  $^1\text{H}$  NMR (400 MHz,  $\text{CD}_3\text{OD}$ )  $\delta$  7.46-7.43 (m, 2H), 7.27-7.25 (m, 2H), 4.62-4.60 (m, 1H), 3.56-3.54 (m, 2H).  $^{13}\text{C}$  NMR (101 MHz,  $\text{CD}_3\text{OD}$ )  $\delta$  141.41, 130.90, 128.02, 120.70, 73.79, 67.06.

(*S*)-1-(3,5-bis(trifluoromethyl)phenyl)-1,2-ethanediol **2m**

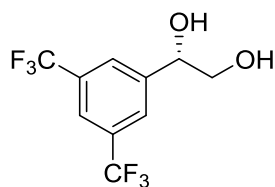

Colorless solid, 54.3 mg, 99% yield; >99% ee;  $[\alpha]_{\text{D}}^{25} = +35.8$  ( $c = 0.50$ ,  $\text{CHCl}_3$ ). The enantiomeric excess was determined by HPLC on Chiralpak OD-H column, hexane: isopropanol = 98:2; flow rate = 1.0 mL/min; UV detection at 220 nm;  $t_{\text{R}}(R) = 18.64$  min (minor),  $t_{\text{R}}(S) = 20.74$  min (major).  $^1\text{H}$  NMR (400 MHz,  $\text{CD}_3\text{OD}$ )  $\delta$  7.90 (s, 2H), 7.76 (s, 1H), 4.75 (t,  $J = 8.0$  Hz, 1H), 3.57 (d,  $J = 8.0$  Hz, 2H).  $^{13}\text{C}$  NMR (101 MHz,  $\text{CDCl}_3$ )  $\delta$  143.03, 131.80 (q,  $J = 33.0$  Hz), 126.27, 121.86, 99.99, 73.39, 67.58.  $^{19}\text{F}$  NMR (377 MHz,  $\text{CDCl}_3$ )  $\delta$  -62.89.

(*S*)-1-(1-Naphtyl)-1,2-ethanediol **2n**

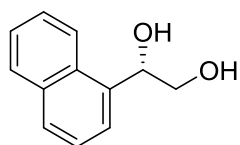

Colorless solid, 37.3 mg, 99% yield; 97% ee;  $[\alpha]_{\text{D}}^{25} = +35.8$  ( $c = 0.50$ , MeOH). The enantiomeric excess was determined by HPLC on Chiralpak OD-H column, hexane: isopropanol = 70:30; flow rate

= 0.5 mL/min; UV detection at 254 nm;  $t_R(R)$  = 10.54 min (minor),  $t_R(S)$  = 14.83 min (major).  $^1\text{H}$  NMR (400 MHz,  $\text{CD}_3\text{OD}$ )  $\delta$  8.17 (d,  $J$  = 8.0 Hz, 1H), 7.92-7.90 (m, 1H), 7.83-7.81 (m, 1H), 7.59 (d,  $J$  = 7.1 Hz, 1H), 7.74-7.72 (m, 1H), 7.56-7.49 (m, 3H), 5.57-5.55 (m, 1H), 3.90-3.86 (m, 1H), 3.73-3.68 (m, 1H).  $^{13}\text{C}$  NMR (101 MHz,  $\text{CD}_3\text{OD}$ )  $\delta$  137.30, 133.83, 130.65, 128.47, 127.53, 125.62, 125.09, 125.01, 123.29, 122.60, 71.37, 67.02.

**(S)-1-(2-Naphtyl)-1,2-ethanediol 2o**

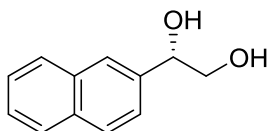

Colorless solid, 37.3 mg, 99% yield; 99% ee;  $[\alpha]_D^{25}$  = +13.6 ( $c$  = 0.50, MeOH). The enantiomeric excess was determined by HPLC on Chiralpak OD-H column, hexane: isopropanol = 70:30; flow rate = 0.5 mL/min; UV detection at 254 nm;  $t_R(R)$  = 11.18 min (minor),  $t_R(S)$  = 12.39 min (major).  $^1\text{H}$  NMR (400 MHz,  $\text{CD}_3\text{OD}$ )  $\delta$  7.87-7.84 (m, 4H), 7.48-7.46 (m, 3H), 4.91-4.83 (m, 1H), 3.75-3.72 (m, 2H).  $^{13}\text{C}$  NMR (101 MHz,  $\text{CD}_3\text{OD}$ )  $\delta$  139.43, 133.39, 133.12, 127.53, 127.51, 127.24, 125.66, 125.38, 124.84, 124.17, 74.65, 67.24.

**(R)-1-(2-Furyl)-1,2-ethanediol 2p**

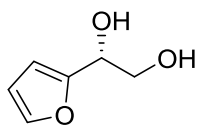

Colorless solid, 25.4 mg, 99% yield; >99% ee;  $[\alpha]_D^{25}$  = +4.4 ( $c$  = 0.50, MeOH). The enantiomeric excess was determined by HPLC on Chiralpak OD-H column, hexane: isopropanol = 95:5; flow rate = 0.8 mL/min; UV detection at 230 nm;  $t_R(S)$  = 25.36 min (minor),  $t_R(R)$  = 29.82 min (major).  $^1\text{H}$  NMR (400 MHz,  $\text{CDCl}_3$ )  $\delta$  7.37 (s, 1H), 6.34-6.29 (m, 2H), 4.79-4.77 (m, 1H), 3.87-3.79 (m, 2H), 3.74 (brs, 1H), 3.29 (brs, 1H).  $^{13}\text{C}$  NMR (101 MHz,  $\text{CDCl}_3$ )  $\delta$  153.55, 142.32, 110.34, 107.02, 68.34, 65.04.

**(R)-1-(2-Thienyl)-1,2-ethanediol 2q**

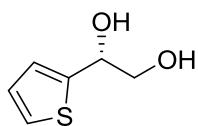

Colorless solid, 28.6 mg, 99% yield; >99% ee;  $[\alpha]_D^{25}$  = +36.9 ( $c$  = 0.52,  $\text{CHCl}_3$ ). The enantiomeric excess was determined by HPLC on Chiralpak OD-H column, hexane: isopropanol = 95:5; flow rate = 1.0 mL/min; UV detection at 220 nm;  $t_R(S)$  = 7.59 min (minor),  $t_R(R)$  = 9.02 min (major).  $^1\text{H}$  NMR (400 MHz,  $\text{CDCl}_3$ )  $\delta$  7.27-7.25 (m, 1H), 6.99-6.97 (m, 2H), 5.01 (dd,  $J$  = 7.6, 3.6 Hz, 1H), 3.81-3.68 (m, 2H), 3.68 (brs, 1H), 3.20 (brs, 1H).  $^{13}\text{C}$  NMR (101 MHz,  $\text{CDCl}_3$ )  $\delta$  143.86, 126.89, 125.10, 124.46, 70.70, 67.69.

**(S)-1,2-Propanediol 2r**

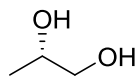

Colorless oil, 15.1 mg, 99% yield; 93% ee;  $[\alpha]_{\text{D}}^{25} = +7.0$  ( $c = 0.50$ , MeOH). The enantiomeric excess was determined by HPLC on Chiralpak OD-H column, hexane: isopropanol = 98:2; flow rate = 1.0 mL/min; UV detection at 205 nm;  $t_{\text{R}}(R) = 41.36$  min (minor),  $t_{\text{R}}(S) = 43.34$  min (major). HPLC conditions (To the corresponding *p*-Toluenesulfonyl derivatives).  $^1\text{H}$  NMR (400 MHz,  $d\text{-DMSO}$ )  $\delta$  4.39-4.37 (m, 1H), 4.32 (d,  $J = 4.5$  Hz, 1H), 3.50-3.38 (m, 1H), 3.20-3.11 (m, 1H), 3.07-3.03 (m, 1H), 0.89 (d,  $J = 6.3$  Hz, 3H).  $^{13}\text{C}$  NMR (101 MHz,  $d\text{-DMSO}$ )  $\delta$  67.69, 67.64, 20.42.

#### (*R*)-1,2-Butanediol **2s**

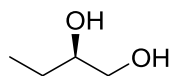

Colorless oil, 17.8 mg, 99% yield; 96% ee;  $[\alpha]_{\text{D}}^{25} = +0.8$  ( $c = 0.28$ , MeOH). The enantiomeric excess was determined by HPLC on Chiralpak OD-H column, hexane: isopropanol = 98:2; flow rate = 1.0 mL/min; UV detection at 205 nm;  $t_{\text{R}}(S) = 28.2$  min (minor),  $t_{\text{R}}(R) = 32.37$  min (major). HPLC conditions (To the corresponding *p*-Toluenesulfonyl derivatives).  $^1\text{H}$  NMR (400 MHz,  $\text{CD}_3\text{OD}$ )  $\delta$  3.41-3.22 (m, 3H), 1.45-1.43 (m, 1H), 1.32-1.26 (m, 1H), 0.86 (t,  $J = 8.0$  Hz, 3H).  $^{13}\text{C}$  NMR (101 MHz,  $\text{CD}_3\text{OD}$ )  $\delta$  73.30, 65.60, 25.81, 8.94.

#### Asymmetric Hydrogenation of acetophenone at S/C = 1 000 000

To a 4 mL vial was added the catalyst precursor  $[\text{Ir}(\text{COD})\text{Cl}]_2$  (1.4 mg,  $2.0 \times 10^{-3}$  mmol), ligand **L3** (2.4 mg,  $4.2 \times 10^{-3}$  mmol) and anhydrous  $i\text{PrOH}$  (2.0 mL) under argon atmosphere. The mixture was stirred for 2.0 h at 25 °C giving orange red solution in the argon-filled glovebox. The resulting solution (50  $\mu\text{L}$ ) and  $\text{K}_2\text{CO}_3$  (13.8 mg) transferred by syringe into a 100 mL vial charged with recrystallized  $\alpha$ -hydroxyacetophenone (100 mmol) in 25 mL anhydrous  $i\text{PrOH}$ . The vial was transferred to an autoclave, which was then charged with 50 atm of  $\text{H}_2$  and stirred at room temperature for 24 h. The hydrogen gas was released slowly in a well-ventilated hood and the solution was concentrated and passed through a column of silica gel to remove the metal complex. The product (*S*)-1-Phenyl-1,2-ethanediol **2a** was analyzed by chiral HPLC, >99% yield and >99% ee.



### III. GC and HPLC spectra

Data File E:\DATA\WVL\XY-1-23\XY-1-23 2015-12-12 13-39-51\043-0501.D  
Sample Name: WVL-2-PH-diol-rac

```
=====
Acq. Operator   : SYSTEM                      Seq. Line :    5
Acq. Instrument : 1260HPLC-DAD                Location  : Vial 43
Injection Date  : 12/12/2015 2:31:07 PM       Inj       :    1
                                           Inj Volume: 1.000 µl

Acq. Method     : E:\DATA\WVL\XY-1-23\XY-1-23 2015-12-12 13-39-51\DAD-0D(1-2)-98-2-1.OML-
                  205-250NM-60MIN.M
Last changed    : 12/12/2015 3:21:25 PM by SYSTEM
                  (modified after loading)
Analysis Method : E:\DATA\WVL\XY-1-23\XY-1-23 2015-12-12 13-39-51\DAD-0D(1-2)-98-2-1.OML-
                  205-250NM-60MIN.M (Sequence Method)
Last changed    : 12/12/2015 8:56:24 PM by SYSTEM
                  (modified after loading)
Additional Info : Peak(s) manually integrated
=====
```

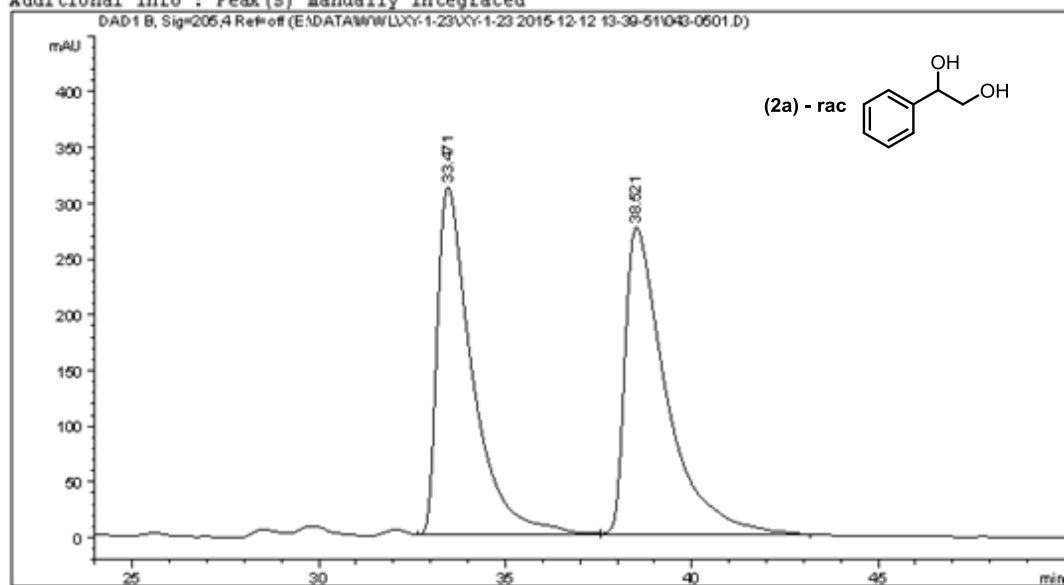

#### Area Percent Report

```
Sorted By      : Signal
Multiplier     : 1.0000
Dilution       : 1.0000
Do not use Multiplier & Dilution Factor with ISTDs
```

Signal 1: DAD1 B, Sig=205,4 Ref=off

| Peak # | RetTime [min] | Type | Width [min] | Area [mAU*s] | Height [mAU] | Area %  |
|--------|---------------|------|-------------|--------------|--------------|---------|
| 1      | 33.471        | BB   | 0.9290      | 2.02411e4    | 311.96320    | 49.0873 |
| 2      | 38.521        | BB   | 1.0839      | 2.09938e4    | 274.60208    | 50.9127 |

Totals : 4.12349e4 586.56528

```
=====
Acq. Operator   : SYSTEM                      Seq. Line :    2
Acq. Instrument : 1260HPLC-DAD                Location  : Vial 21
Injection Date  : 11/20/2015 10:22:52 PM      Inj       :    1
                                           Inj Volume: 1.000 µl
Acq. Method     : E:\DATA\WWL\WWL-2-193\WWL-2-193 2015-11-20 22-05-02\DAD-0D (1-2)-98-2-1.
                                           OML-205-250NM-50MIN.M
Last changed    : 11/20/2015 10:05:02 PM by SYSTEM
Analysis Method : E:\DATA\WWL\WWL-2-193\WWL-2-193 2015-11-20 22-05-02\DAD-0D (1-2)-98-2-1.
                                           OML-205-250NM-50MIN.M (Sequence Method)
Last changed    : 1/16/2016 3:06:08 PM by SYSTEM
                                           (modified after loading)
Additional Info : Peak(s) manually integrated
=====
```

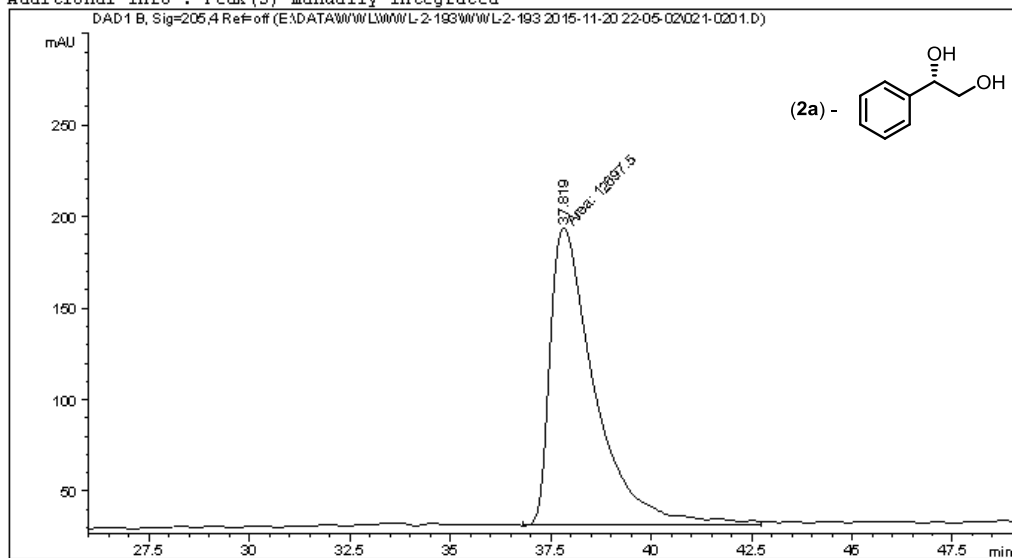

=====  
Area Percent Report  
=====

Sorted By : Signal  
Multiplier : 1.0000  
Dilution : 1.0000  
Do not use Multiplier & Dilution Factor with ISTDs

Signal 1: DAD1 B, Sig=205,4 Ref=off

| Peak # | RetTime [min] | Type | Width [min] | Area [mAU*s] | Height [mAU] | Area %   |
|--------|---------------|------|-------------|--------------|--------------|----------|
| 1      | 37.819        | MM   | 1.3045      | 1.26975e4    | 162.22153    | 100.0000 |

Totals : 1.26975e4 162.22153

=====  
\*\*\* End of Report \*\*\*

Data File E:\DATA\WV...-ALKYL0L-TS-RAC\WV-2-ALKYL0L-TS-RAC 2015-12-11 16-54-57\031-1601.D  
Sample Name: wvl-o-me-diol-rac

```
=====
Acq. Operator   : SYSTEM                      Seq. Line :   16
Acq. Instrument : 1260HPLC-VWD                Location  : Vial 31
Injection Date  : 12/12/2015 3:28:12 AM        Inj       :    1
                                           Inj Volume: 1.000 µl
Acq. Method     : E:\DATA\WV\WV-2-ALKYL0L-TS-RAC\WV-2-ALKYL0L-TS-RAC 2015-12-11 16-54-
                    57\WVD-OD(1-2)-98-2-1.OML-210NM-50MIN.M
Last changed    : 12/11/2015 10:33:54 PM by SYSTEM
Analysis Method : E:\DATA\WV\WV-2-ALKYL0L-TS-RAC\WV-2-ALKYL0L-TS-RAC 2015-12-11 16-54-
                    57\WVD-OD(1-2)-98-2-1.OML-210NM-50MIN.M (Sequence Method)
Last changed    : 12/12/2015 9:03:32 PM by SYSTEM
                    (modified after loading)
Additional Info : Peak(s) manually integrated
=====
```

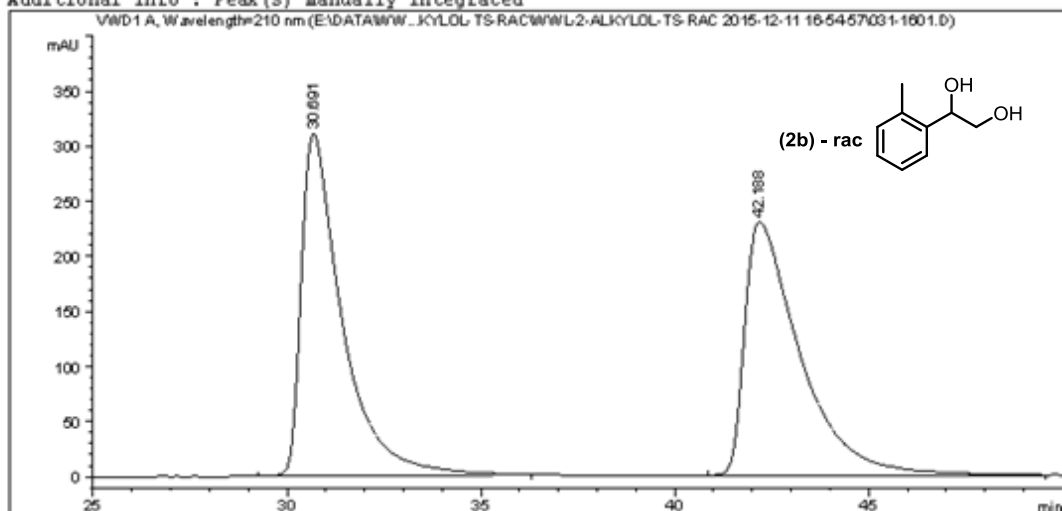

# Area Percent Report

```
Sorted By      : Signal
Multiplier     : 1.0000
Dilution       : 1.0000
Do not use Multiplier & Dilution Factor with ISTDs
```

Signal 1: VWD1 A, Wavelength=210 nm

| Peak # | RetTime [min] | Type | Width [min] | Area [mAU*s] | Height [mAU] | Area %  |
|--------|---------------|------|-------------|--------------|--------------|---------|
| 1      | 30.691        | BB   | 1.0829      | 2.27558e4    | 310.53751    | 49.8536 |
| 2      | 42.188        | BB   | 1.4290      | 2.28895e4    | 230.02068    | 50.1464 |

Totals : 4.56453e4 540.55818

\*\*\* End of Report \*\*\*

Data File E:\DATA\DX\ZXB-206\ZXB-206(RAC-OD) 2015-12-14 19-57-50\041-1201.D  
Sample Name: WWL-3-08-1

```

=====
Acq. Operator   : SYSTEM                      Seq. Line :   12
Acq. Instrument : 1260HPLC-DAD                Location  : Vial 41
Injection Date  : 12/15/2015 1:05:43 AM        Inj       :    1
                                           Inj Volume: 1.000 µl
Acq. Method     : E:\DATA\DX\ZXB-206\ZXB-206(RAC-OD) 2015-12-14 19-57-50\DAD-OD(1-2)-98-2-
                  1.OML-205-250NM-50MIN.M
Last changed    : 12/14/2015 8:13:46 PM by SYSTEM
Analysis Method : E:\DATA\DX\ZXB-206\ZXB-206(RAC-OD) 2015-12-14 19-57-50\DAD-OD(1-2)-98-2-
                  1.OML-205-250NM-50MIN.M (Sequence Method)
Last changed    : 1/21/2016 12:50:11 PM by SYSTEM
                  (modified after loading)
Additional Info : Peak(s) manually integrated
DAD1 D, Sig=220,4 Ref=off(E:\DATA\DX\ZXB-206\ZXB-206(RAC-OD) 2015-12-14 19-57-50\041-1201.D)

```

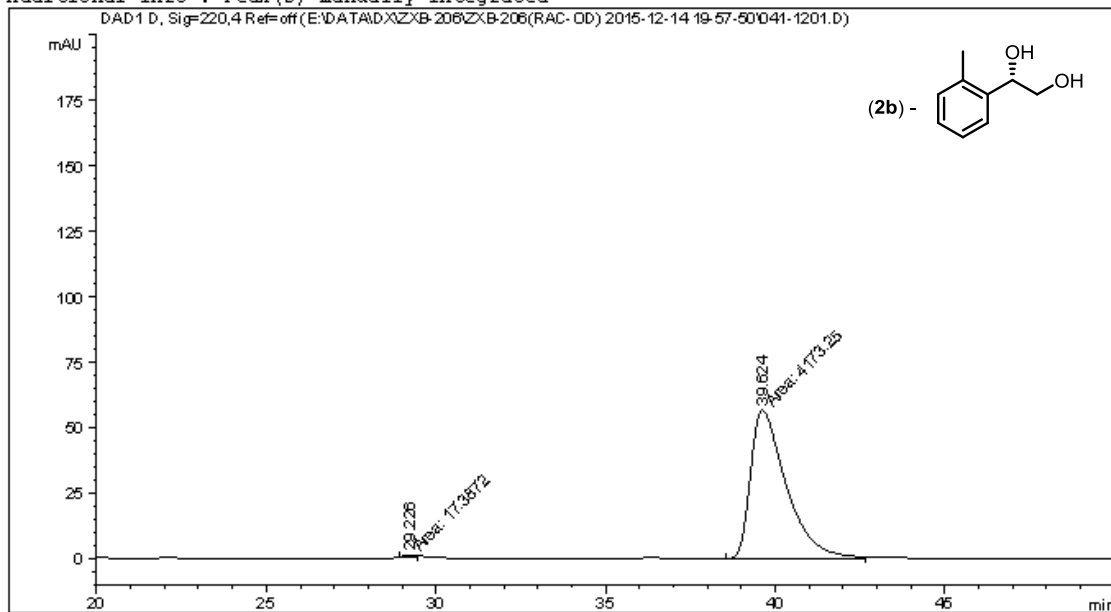

# Area Percent Report

```

Sorted By      :      Signal
Multiplier     :      1.0000
Dilution       :      1.0000
Do not use Multiplier & Dilution Factor with ISTDs

```

Signal 1: DAD1 D, Sig=220,4 Ref=off

| Peak #   | RetTime [min] | Type | Width [min] | Area [mAU*s] | Height [mAU] | Area %  |
|----------|---------------|------|-------------|--------------|--------------|---------|
| 1        | 29.226        | MM   | 0.4380      | 17.38722     | 6.61577e-1   | 0.4149  |
| 2        | 39.624        | MM   | 1.2267      | 4173.24707   | 56.70223     | 99.5851 |
| Totals : |               |      |             | 4190.63429   | 57.36381     |         |

\*\*\* End of Report \*\*\*

```
=====
Acq. Operator   : SYSTEM                      Seq. Line :   19
Acq. Instrument : 1260HPLC-DAD                Location  : Vial 63
Injection Date  : 5/31/2015 10:38:59 PM        Inj       :    1
                                           Inj Volume: 5.000 µl
Acq. Method     : E:\DATA\YJF\YJF-2-75\YJF-2-75-DAD-OD-95-5-1 2015-05-31 16-06-23\DAD-ODH-
98-2-1NL-50MIN(1-2).M
Last changed    : 5/31/2015 4:09:31 PM by SYSTEM
Analysis Method : E:\DATA\YJF\YJF-2-75\YJF-2-75-DAD-OD-95-5-1 2015-05-31 16-06-23\DAD-ODH-
98-2-1NL-50MIN(1-2).M (Sequence Method)
Last changed    : 12/9/2015 7:40:10 PM by SYSTEM
                  (modified after loading)
Additional Info : Peak(s) manually integrated
DAD1 C, Sig=210,4 Ref=off(E:\DATA\YJF\YJF-2-75\YJF-2-75-DAD-OD-95-5-1 2015-05-31 16-06-23\063-1901.D)
```

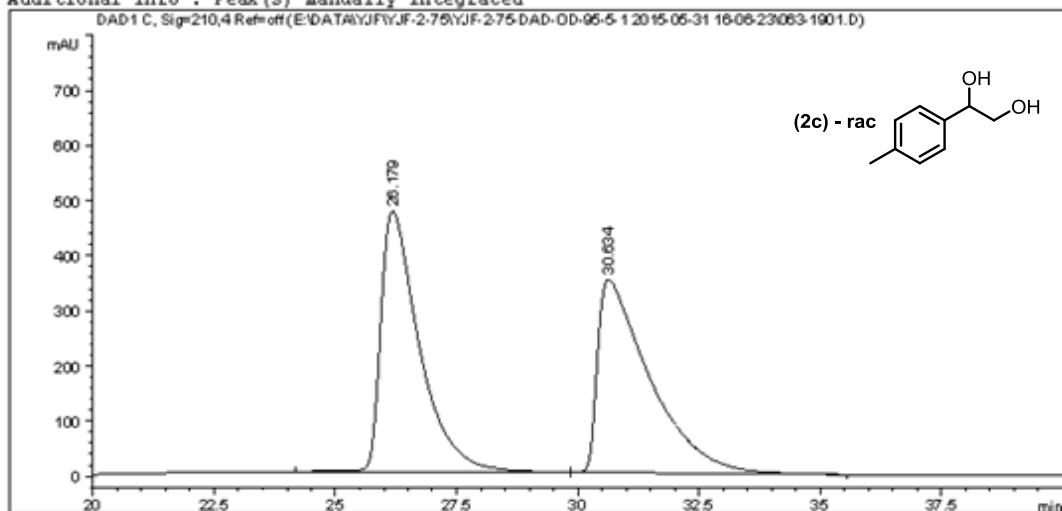

# Area Percent Report

```
Sorted By      : Signal
Multiplier     : 1.0000
Dilution       : 1.0000
Do not use Multiplier & Dilution Factor with ISTDs
```

Signal 1: DAD1 C, Sig=210,4 Ref=off

| Peak # | RetTime [min] | Type | Width [min] | Area [mAU*s] | Height [mAU] | Area %  |
|--------|---------------|------|-------------|--------------|--------------|---------|
| 1      | 26.179        | BB   | 0.8220      | 2.62215e4    | 473.53427    | 49.9787 |
| 2      | 30.634        | BB   | 1.0955      | 2.62438e4    | 350.51547    | 50.0213 |

Totals : 5.24653e4 824.04974

\*\*\* End of Report \*\*\*

```
=====
Acq. Operator   : SYSTEM                      Seq. Line :   15
Acq. Instrument : 1260HPLC-DAD                Location  : Vial 44
Injection Date  : 12/15/2015 3:38:21 AM       Inj       :    1
                                           Inj Volume: 1.000 µl
Acq. Method     : E:\DATA\DX\ZXB-206\ZXB-206(RAC-OD) 2015-12-14 19-57-50\DAD-OD(1-2)-98-2-
                  1.OML-205-250NM-40MIN.M
Last changed    : 12/14/2015 8:13:44 PM by SYSTEM
Analysis Method : E:\DATA\DX\ZXB-206\ZXB-206(RAC-OD) 2015-12-14 19-57-50\DAD-OD(1-2)-98-2-
                  1.OML-205-250NM-40MIN.M (Sequence Method)
Last changed    : 12/15/2015 9:48:41 AM by SYSTEM
                  (modified after loading)
Additional Info : Peak(s) manually integrated
DAD1 C, Sig=210,4 Ref=off(E:\DATA\DX\ZXB-206\ZXB-206(RAC-OD) 2015-12-14 19-57-50\044-1501.D)
=====
```

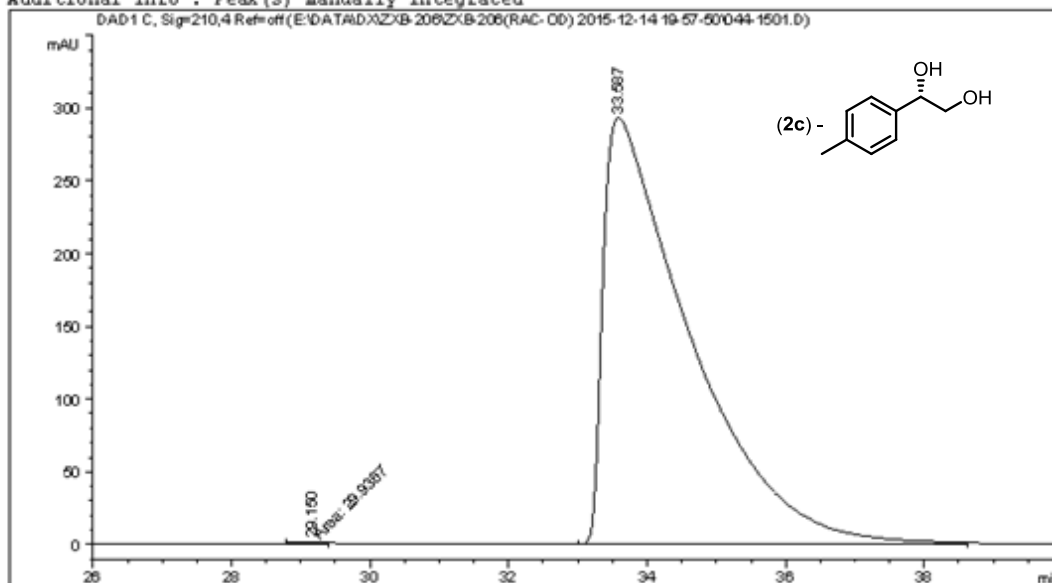

# Area Percent Report

```
Sorted By      : Signal
Multiplier     : 1.0000
Dilution       : 1.0000
Do not use Multiplier & Dilution Factor with ISTDs
```

Signal 1: DAD1 C, Sig=210,4 Ref=off

| Peak # | RetTime [min] | Type | Width [min] | Area [mAU*s] | Height [mAU] | Area %  |
|--------|---------------|------|-------------|--------------|--------------|---------|
| 1      | 29.150        | MM   | 0.5309      | 29.93672     | 9.39864e-1   | 0.1175  |
| 2      | 33.587        | BB   | 1.1571      | 2.54515e4    | 293.10132    | 99.8825 |

Totals : 2.54814e4 294.04118

\*\*\* End of Report \*\*\*

=====

|                 |                         |            |            |
|-----------------|-------------------------|------------|------------|
| Acq. Operator   | : SYSTEM                | Seq. Line  | : 20       |
| Acq. Instrument | : 1260HPLC-DAD          | Location   | : Vial 64  |
| Injection Date  | : 5/31/2015 11:29:57 PM | Inj        | : 1        |
|                 |                         | Inj Volume | : 5.000 µl |

Acq. Method : E:\DATA\YJF\YJF-2-75\YJF-2-75-DAD-OD-95-5-1 2015-05-31 16-06-23\DAD-ODH-98-2-1ML-65MIN(1-2).M  
Last changed : 5/31/2015 4:11:31 PM by SYSTEM  
Analysis Method : E:\DATA\YJF\YJF-2-75\YJF-2-75-DAD-OD-95-5-1 2015-05-31 16-06-23\DAD-ODH-98-2-1ML-65MIN(1-2).M (Sequence Method)  
Last changed : 12/9/2015 7:45:09 PM by SYSTEM  
(modified after loading)

Additional Info : Peak(s) manually integrated

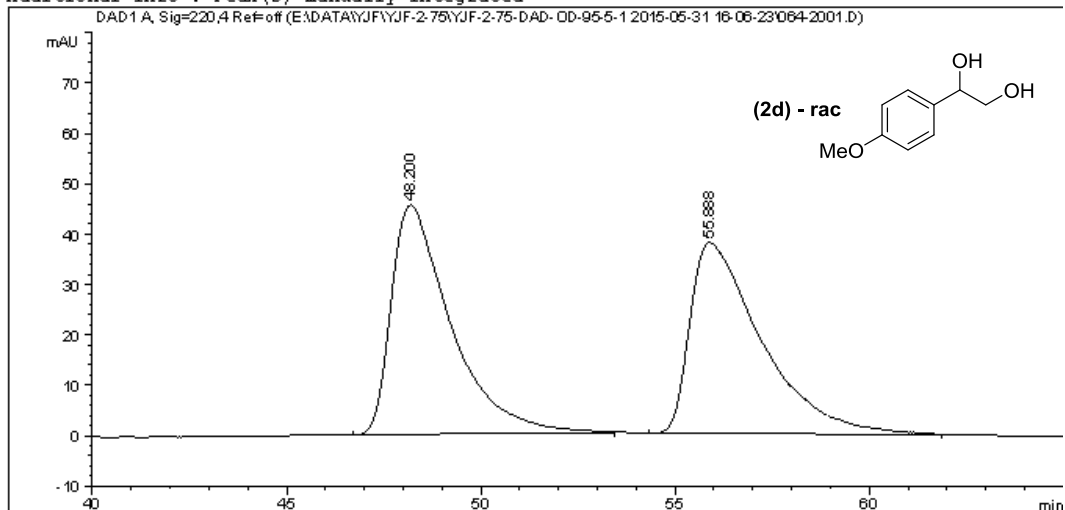

=====  
Area Percent Report  
=====

Sorted By : Signal  
Multiplier : 1.0000  
Dilution : 1.0000  
Do not use Multiplier & Dilution Factor with ISTDs

Signal 1: DAD1 A, Sig=220,4 Ref=off

| Peak # | RetTime [min] | Type | Width [min] | Area [mAU*s] | Height [mAU] | Area %  |
|--------|---------------|------|-------------|--------------|--------------|---------|
| 1      | 48.200        | BB   | 1.4831      | 4843.86768   | 45.53268     | 49.9939 |
| 2      | 55.888        | BB   | 1.7096      | 4845.04785   | 37.94681     | 50.0061 |

Totals : 9688.91553 83.47949

=====  
\*\*\* End of Report \*\*\*

```
=====
Acq. Operator   : SYSTEM                      Seq. Line :    8
Acq. Instrument : 1260HPLC-DAD                Location  : Vial 7
Injection Date  : 11/14/2015 9:17:19 PM       Inj       :    1
                                           Inj Volume: 1.000 µl
Acq. Method     : E:\DATA\WWL\WWL-2-185\WWL-2-185 2015-11-14 16-04-27\
DAD-OD (1-2)-98-2-1.
                   OML-205-250NM-70MIN.M
Last changed    : 11/14/2015 4:04:27 PM by SYSTEM
Analysis Method : E:\DATA\WWL\WWL-2-185\WWL-2-185 2015-11-14 16-04-27\
DAD-OD (1-2)-98-2-1.
                   OML-205-250NM-70MIN.M (Sequence Method)
Last changed    : 12/13/2015 3:27:10 PM by SYSTEM
                   (modified after loading)
Additional Info : Peak(s) manually integrated
=====
```

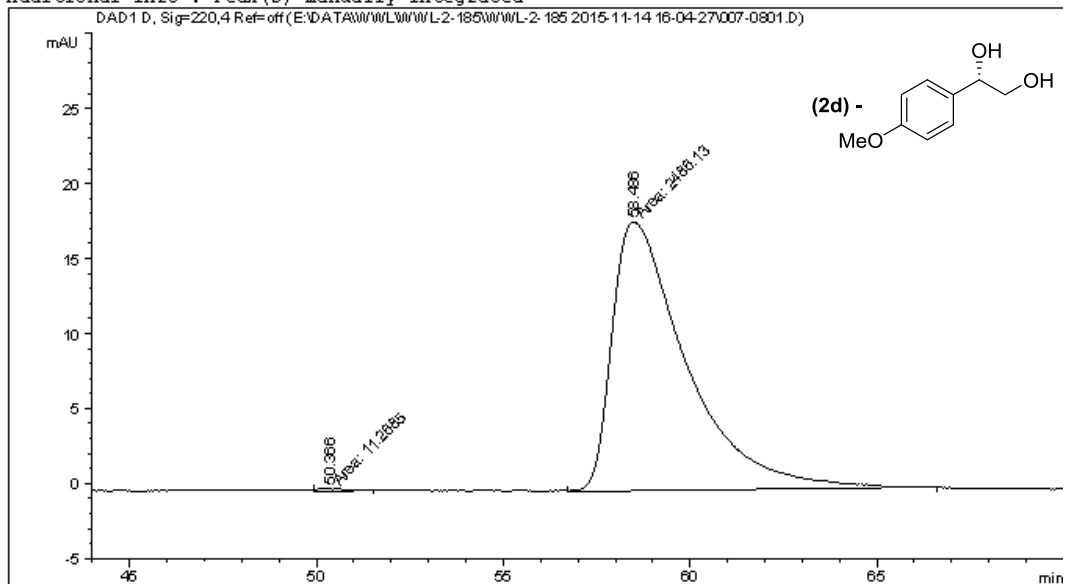

=====  
Area Percent Report  
=====

```
Sorted By      :      Signal
Multiplier     :      1.0000
Dilution       :      1.0000
Do not use Multiplier & Dilution Factor with ISTDs
```

Signal 1: DAD1 D, Sig=220,4 Ref=off

| Peak # | RetTime [min] | Type | Width [min] | Area [mAU*s] | Height [mAU] | Area %  |
|--------|---------------|------|-------------|--------------|--------------|---------|
| 1      | 50.366        | MM   | 1.1124      | 11.26848     | 1.68836e-1   | 0.4512  |
| 2      | 58.486        | MM   | 2.3108      | 2486.12793   | 17.93087     | 99.5488 |

Totals :                    2497.39641    18.09971

=====  
\*\*\* End of Report \*\*\*



Data File E:\DATA\WFY\WFY-1-170\DX20150921-ZXB-81 2015-09-22 11-07-21\062-0601.D  
Sample Name: WWL-P-ET-RAC

```

=====
Acq. Operator   : SYSTEM                      Seq. Line :    6
Acq. Instrument : 1260HPLC-DAD                Location  : Vial 62
Injection Date  : 9/22/2015 1:43:57 PM        Inj       :    1
                                           Inj Volume: 1.000 µl
Acq. Method     : E:\DATA\WFY\WFY-1-170\DX20150921-ZXB-81 2015-09-22 11-07-21\DAD-0D(1-2)-
98-2-1ML-210NM-254NM-40MIN.M
Last changed    : 9/22/2015 11:07:21 AM by SYSTEM
Analysis Method : E:\DATA\WFY\WFY-1-170\DX20150921-ZXB-81 2015-09-22 11-07-21\DAD-0D(1-2)-
98-2-1ML-210NM-254NM-40MIN.M (Sequence Method)
Last changed    : 12/11/2015 10:43:20 AM by SYSTEM
                  (modified after loading)
Additional Info : Peak(s) manually integrated

```

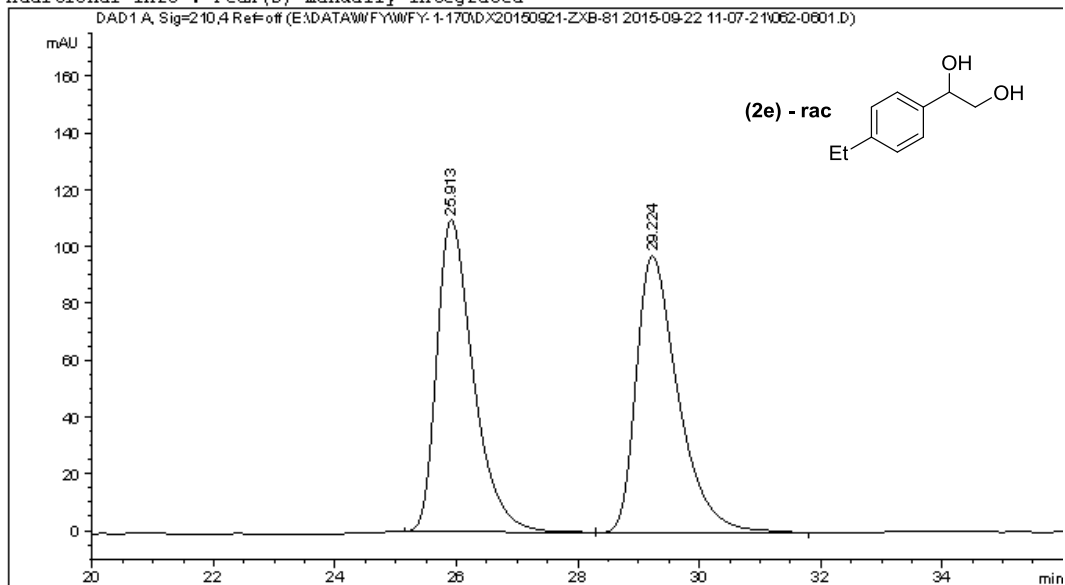

Area Percent Report

```

Sorted By      : Signal
Multiplier     : 1.0000
Dilution       : 1.0000
Do not use Multiplier & Dilution Factor with ISTDs

```

Signal 1: DAD1 A, Sig=210,4 Ref=off

| Peak # | RetTime [min] | Type | Width [min] | Area [mAU*s] | Height [mAU] | Area %  |
|--------|---------------|------|-------------|--------------|--------------|---------|
| 1      | 25.913        | BB   | 0.6348      | 4594.16797   | 109.66184    | 49.5306 |
| 2      | 29.224        | BB   | 0.7202      | 4681.23682   | 97.48492     | 50.4694 |

Totals : 9275.40479 207.14677

\*\*\* End of Report \*\*\*

```
=====
Acq. Operator   : SYSTEM                      Seq. Line :   20
Acq. Instrument : 1260HPLC-DAD                Location  : Vial 75
Injection Date  : 11/11/2015 8:59:24 AM       Inj       :    1
                                           Inj Volume: 5.000 µl
Acq. Method     : E:\DATA\WWL\WWL-2-183-184\WWL-2-183-184 2015-11-10 20:57-01\DAD-0D(1-2)-
                                           98-2-1ML-220NM-254NM-40MIN.M
Last changed    : 11/10/2015 8:57:02 PM by SYSTEM
Analysis Method : E:\DATA\WWL\WWL-2-183-184\WWL-2-183-184 2015-11-10 20:57-01\DAD-0D(1-2)-
                                           98-2-1ML-220NM-254NM-40MIN.M (Sequence Method)
Last changed    : 12/13/2015 3:11:45 PM by SYSTEM
                                           (modified after loading)
Additional Info : Peak(s) manually integrated
=====
```

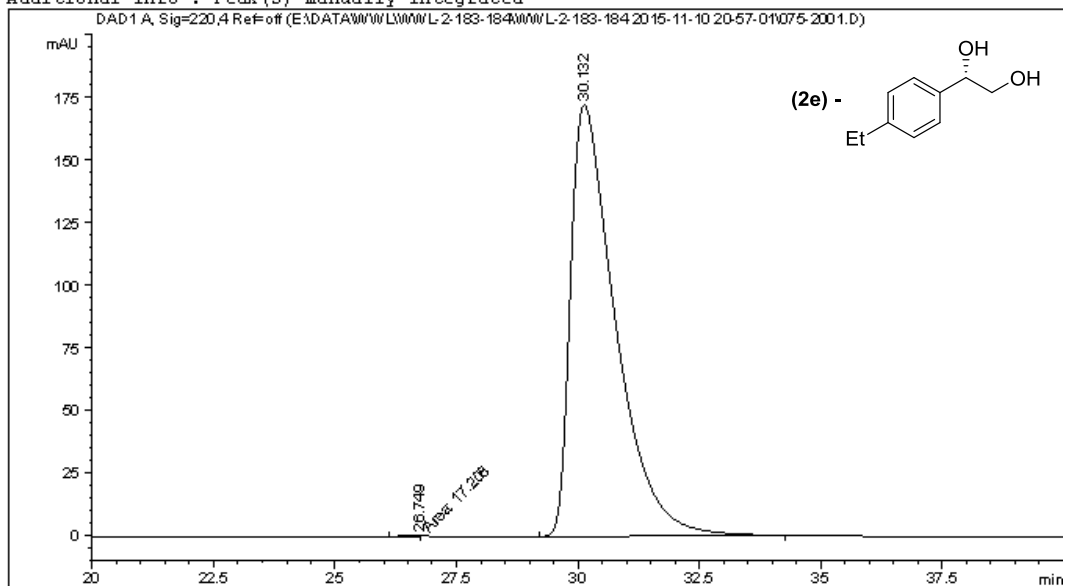

Area Percent Report

```
Sorted By      :      Signal
Multiplier     :      1.0000
Dilution       :      1.0000
Do not use Multiplier & Dilution Factor with ISTDs
```

Signal 1: DAD1 A, Sig=220,4 Ref=off

| Peak # | RetTime [min] | Type | Width [min] | Area [mAU*s] | Height [mAU] | Area %  |
|--------|---------------|------|-------------|--------------|--------------|---------|
| 1      | 26.749        | MM   | 0.4236      | 17.20805     | 6.76984e-1   | 0.1550  |
| 2      | 30.132        | BB   | 0.9381      | 1.10826e4    | 172.36777    | 99.8450 |

Totals : 1.10998e4 173.04475

\*\*\* End of Report \*\*\*

```

=====
Acq. Operator   : SYSTEM                      Seq. Line :    5
Acq. Instrument : 1260HPLC-DAD                Location  : Vial 61
Injection Date  : 9/22/2015 1:03:04 PM         Inj       :    1
                                           Inj Volume: 1.000 µl
Acq. Method     : E:\DATA\WFY\WFY-1-170\DX20150921-ZXB-81 2015-09-22 11-07-21\DAD-0D(1-2)-
98-2-1ML-210NM-254NM-40MIN.M
Last changed    : 9/22/2015 11:07:21 AM by SYSTEM
Analysis Method : E:\DATA\WFY\WFY-1-170\DX20150921-ZXB-81 2015-09-22 11-07-21\DAD-0D(1-2)-
98-2-1ML-210NM-254NM-40MIN.M (Sequence Method)
Last changed    : 12/11/2015 10:33:58 AM by SYSTEM
(modified after loading)

```

Additional Info : Peak(s) manually integrated

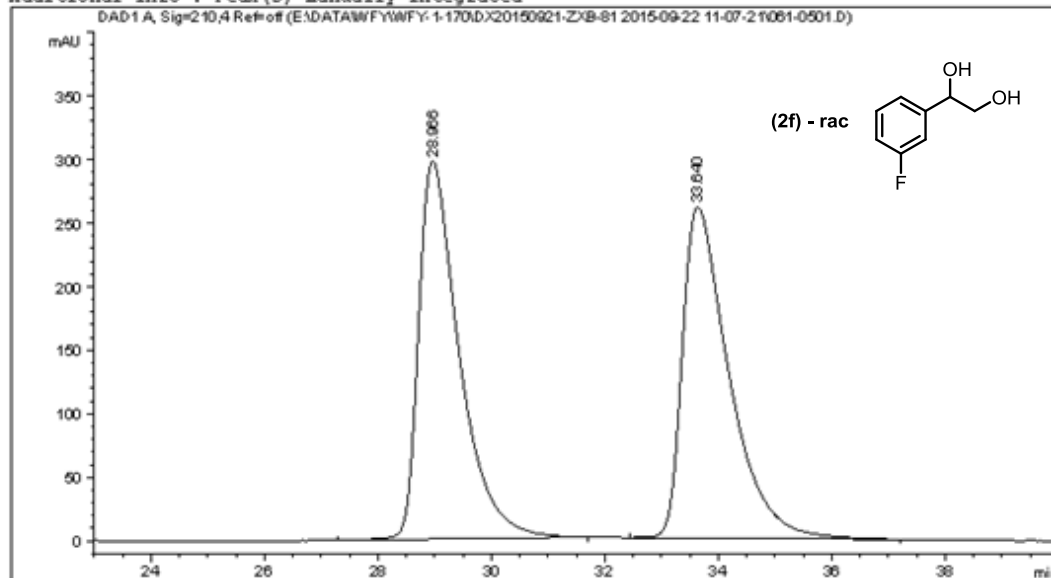

# Area Percent Report

```

Sorted By      :      Signal
Multiplier     :      1.0000
Dilution       :      1.0000
Do not use Multiplier & Dilution Factor with ISTDs

```

Signal 1: DAD1 A, Sig=210,4 Ref=off

| Peak # | RetTime [min] | Type | Width [min] | Area [mAU*s] | Height [mAU] | Area %  |
|--------|---------------|------|-------------|--------------|--------------|---------|
| 1      | 28.966        | BB   | 0.7436      | 1.47666e4    | 297.22147    | 49.8034 |
| 2      | 33.640        | BB   | 0.8449      | 1.48832e4    | 260.35419    | 50.1966 |

Totals : 2.96498e4 557.57565

\*\*\* End of Report \*\*\*

```

=====
Acq. Operator   : SYSTEM                      Seq. Line :    5
Acq. Instrument : 1260HPLC-DAD                Location  : Vial 64
Injection Date  : 11/10/2015 11:52:37 PM      Inj       :    1
                                           Inj Volume: 1.000 µl
Acq. Method     : E:\DATA\WVL\WVL-2-183-184\WVL-2-183-184 2015-11-10 20-57-01\DAD-0D-98-2-
                  -(1-2)1M-220NM-40MIN.M
Last changed    : 11/10/2015 8:57:01 PM by SYSTEM
Analysis Method : E:\DATA\WVL\WVL-2-183-184\WVL-2-183-184 2015-11-10 20-57-01\DAD-0D-98-2-
                  -(1-2)1M-220NM-40MIN.M (Sequence Method)
Last changed    : 12/13/2015 2:58:39 PM by SYSTEM
                  (modified after loading)
Additional Info : Peak(s) manually integrated
DAD1 A, Sig=220,4 Ref=off (E:\DATA\WVL\WVL-2-183-184\WVL-2-183-184 2015-11-10 20-57-01\064-0501.D)
=====

```

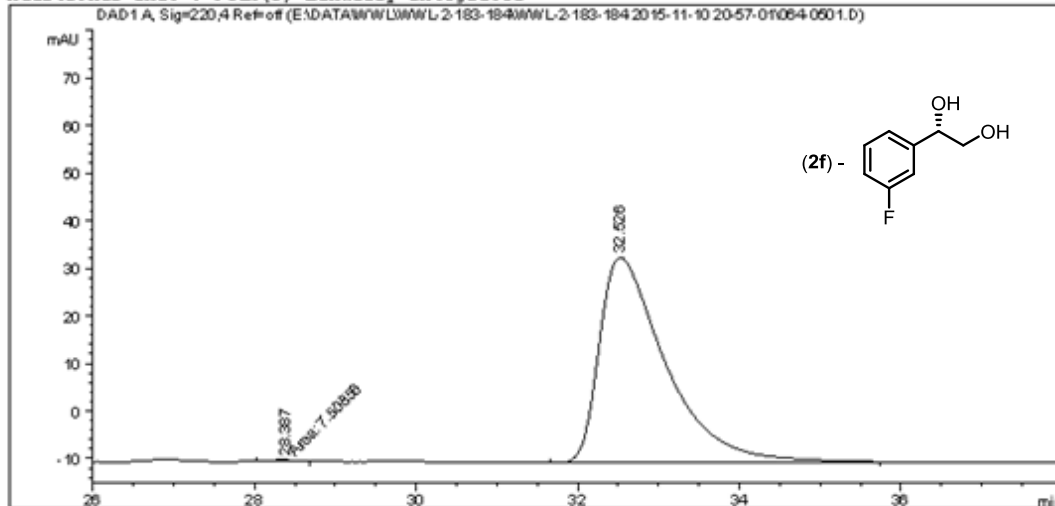

# Area Percent Report

```

Sorted By      :      Signal
Multiplier     :      1.0000
Dilution       :      1.0000
Do not use Multiplier & Dilution Factor with ISTDs

```

Signal 1: DAD1 A, Sig=220,4 Ref=off

| Peak # | RetTime [min] | Type | Width [min] | Area [mAU*s] | Height [mAU] | Area %  |
|--------|---------------|------|-------------|--------------|--------------|---------|
| 1      | 28.387        | MM   | 0.4681      | 7.50856      | 2.67333e-1   | 0.3045  |
| 2      | 32.526        | BB   | 0.8184      | 2458.47510   | 43.17194     | 99.6955 |

Totals : 2465.98366 43.43928

\*\*\* End of Report \*\*\*

```
=====
Acq. Operator   : SYSTEM                      Seq. Line :   18
Acq. Instrument : 1260HPLC-DAD                Location  : Vial 62
Injection Date  : 5/31/2015 9:48:04 PM        Inj       :    1
                                           Inj Volume: 5.000 µl
Acq. Method     : E:\DATA\YJF\YJF-2-75\YJF-2-75-DAD-0D-95-5-1 2015-05-31 16-06-23\DAD-0DH-
98-2-1NL-50MIN(1-2).M
Last changed    : 5/31/2015 4:09:31 PM by SYSTEM
Analysis Method : E:\DATA\YJF\YJF-2-75\YJF-2-75-DAD-0D-95-5-1 2015-05-31 16-06-23\DAD-0DH-
98-2-1NL-50MIN(1-2).M (Sequence Method)
Last changed    : 12/9/2015 8:21:25 PM by SYSTEM
                  (modified after loading)
Additional Info : Peak(s) manually integrated
DAD1 C, Sig=210,4 Ref=off(E:\DATA\YJF\YJF-2-75\YJF-2-75-DAD-0D-95-5-1 2015-05-31 16-06-23\062-1801.D)
```

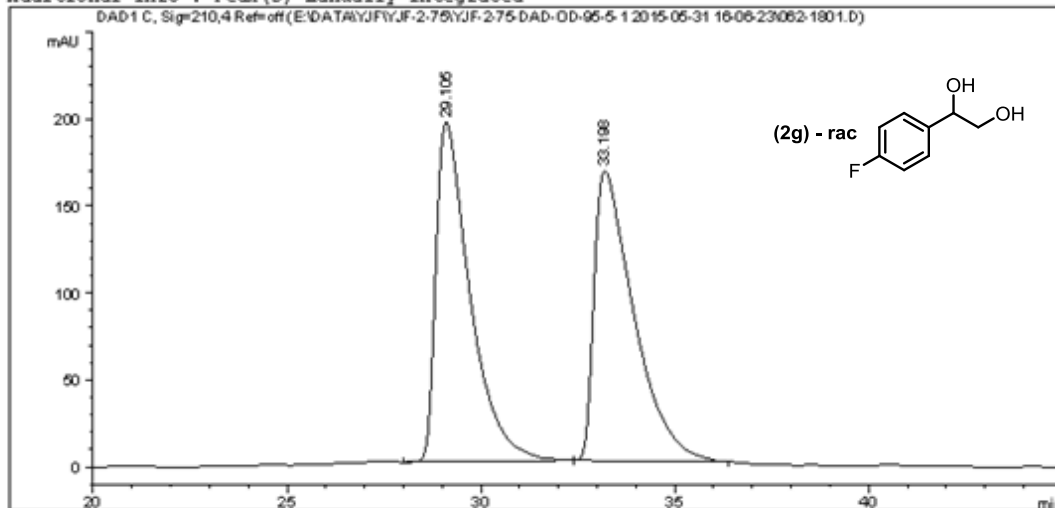

# Area Percent Report

```
Sorted By      :      Signal
Multiplier     :      1.0000
Dilution       :      1.0000
Do not use Multiplier & Dilution Factor with ISTDs
```

Signal 1: DAD1 C, Sig=210,4 Ref=off

| Peak # | RetTime [min] | Type | Width [min] | Area [mAU*s] | Height [mAU] | Area %  |
|--------|---------------|------|-------------|--------------|--------------|---------|
| 1      | 29.105        | BB   | 0.9052      | 1.19408e4    | 195.32858    | 50.1679 |
| 2      | 33.198        | BB   | 1.0139      | 1.18608e4    | 166.73166    | 49.8321 |

Totals : 2.38016e4 362.06024

\*\*\* End of Report \*\*\*

```
=====
Acq. Operator   : SYSTEM                      Seq. Line :    9
Acq. Instrument : 1260HPLC-DAD                Location  : Vial 8
Injection Date  : 11/14/2015 10:28:14 PM      Inj       :    1
                                           Inj Volume: 1.000 µl
Acq. Method     : E:\DATA\WVL\WVL-2-185\WVL-2-185 2015-11-14 16-04-27\
DAD-OD(1-2)-98-2-1.
                                           OML-205-250NM-40MIN.M
Last changed    : 11/14/2015 4:04:27 PM by SYSTEM
Analysis Method : E:\DATA\WVL\WVL-2-185\WVL-2-185 2015-11-14 16-04-27\
DAD-OD(1-2)-98-2-1.
                                           OML-205-250NM-40MIN.M (Sequence Method)
Last changed    : 12/15/2015 10:23:15 AM by SYSTEM
                                           (modified after loading)
Additional Info : Peak(s) manually integrated
=====
```

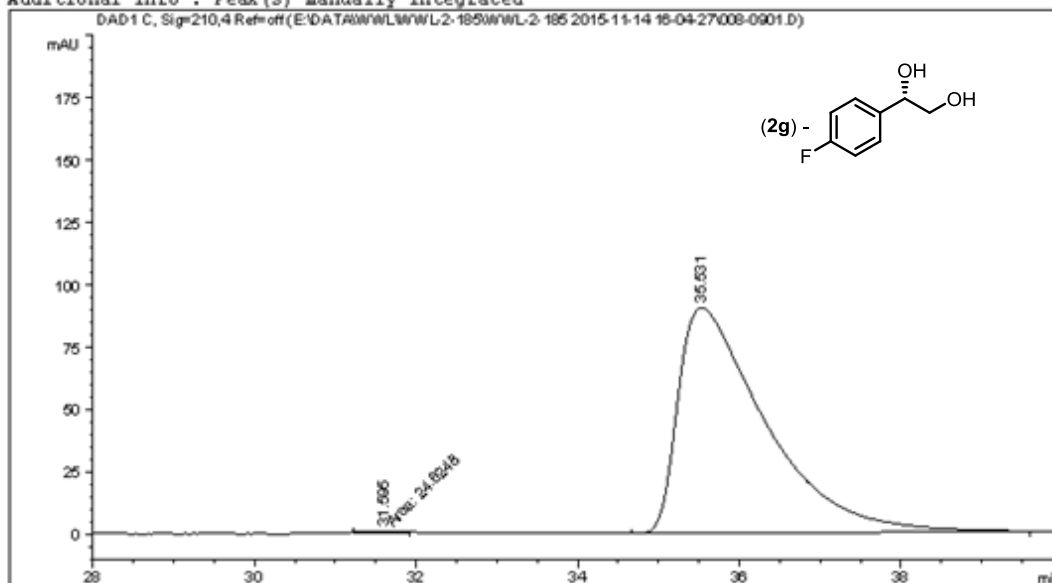

# Area Percent Report

```
Sorted By      : Signal
Multiplier     : 1.0000
Dilution       : 1.0000
Do not use Multiplier & Dilution Factor with ISTDs
```

Signal 1: DAD1 C, Sig=210,4 Ref=off

| Peak # | RetTime [min] | Type | Width [min] | Area [mAU*s] | Height [mAU] | Area %  |
|--------|---------------|------|-------------|--------------|--------------|---------|
| 1      | 31.595        | MM   | 0.5584      | 24.62478     | 7.35022e-1   | 0.3609  |
| 2      | 35.531        | BB   | 1.0188      | 6799.45313   | 90.47634     | 99.6391 |

Totals : 6824.07790 91.21136

\*\*\* End of Report \*\*\*

Data File E:\DATA\WVL\XY-1-23\XY-1-23 2015-12-12 13-39-51\044-0601.D  
Sample Name: WVL-2-o-cl--diol-rac

```
=====
Acq. Operator   : SYSTEM                      Seq. Line :    6
Acq. Instrument : 1260HPLC-DAD                Location  : Vial 44
Injection Date  : 12/12/2015 3:23:59 PM       Inj       :    1
                                           Inj Volume: 1.000 µl
Acq. Method     : E:\DATA\WVL\XY-1-23\XY-1-23 2015-12-12 13-39-51\DAD-0D(1-2)-98-2-1.OML-
205-250NM-60MIN.M
Last changed    : 12/12/2015 3:21:25 PM by SYSTEM
Analysis Method : E:\DATA\WVL\XY-1-23\XY-1-23 2015-12-12 13-39-51\DAD-0D(1-2)-98-2-1.OML-
205-250NM-60MIN.M (Sequence Method)
Last changed    : 12/12/2015 8:48:08 PM by SYSTEM
(modified after loading)
Additional Info : Peak(s) manually integrated
=====
```

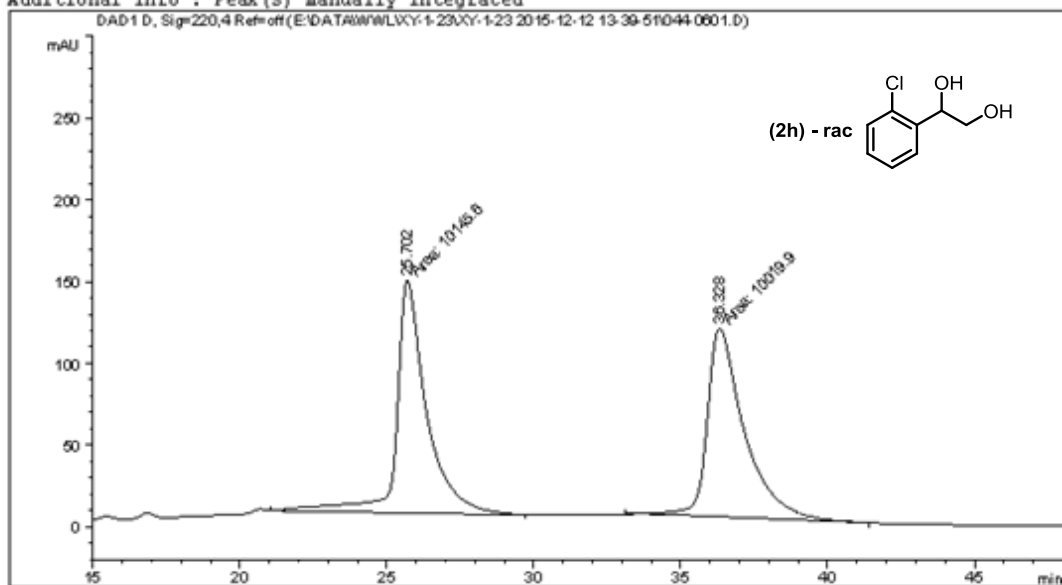

# Area Percent Report

```
Sorted By      : Signal
Multiplier     : 1.0000
Dilution      : 1.0000
Do not use Multiplier & Dilution Factor with ISTDs
```

Signal 1: DAD1 D, Sig=220,4 Ref=off

| Peak # | RetTime [min] | Type | Width [min] | Area [mAU*s] | Height [mAU] | Area %  |
|--------|---------------|------|-------------|--------------|--------------|---------|
| 1      | 25.702        | MM   | 1.1883      | 1.01456e4    | 142.29950    | 50.3117 |
| 2      | 36.328        | MM   | 1.4506      | 1.00199e4    | 115.12132    | 49.6883 |

Totals : 2.01654e4 257.42082

\*\*\* End of Report \*\*\*

```
=====
Acq. Operator   : SYSTEM                      Seq. Line :    8
Acq. Instrument : 1260HPLC-DAD                Location  : Vial 25
Injection Date  : 11/21/2015 1:29:00 AM        Inj       :    1
                                           Inj Volume: 1.000 µl
Acq. Method     : E:\DATA\WWL\WWL-2-193\WWL-2-193 2015-11-20 22-05-02\DAD-OD (1-2)-98-2-1.
                                           OML-205-250NM-50MIN.M
Last changed    : 11/20/2015 10:05:02 PM by SYSTEM
Analysis Method : E:\DATA\WWL\WWL-2-193\WWL-2-193 2015-11-20 22-05-02\DAD-OD (1-2)-98-2-1.
                                           OML-205-250NM-50MIN.M (Sequence Method)
Last changed    : 12/15/2015 10:34:37 AM by SYSTEM
                                           (modified after loading)
Additional Info : Peak(s) manually integrated
=====
```

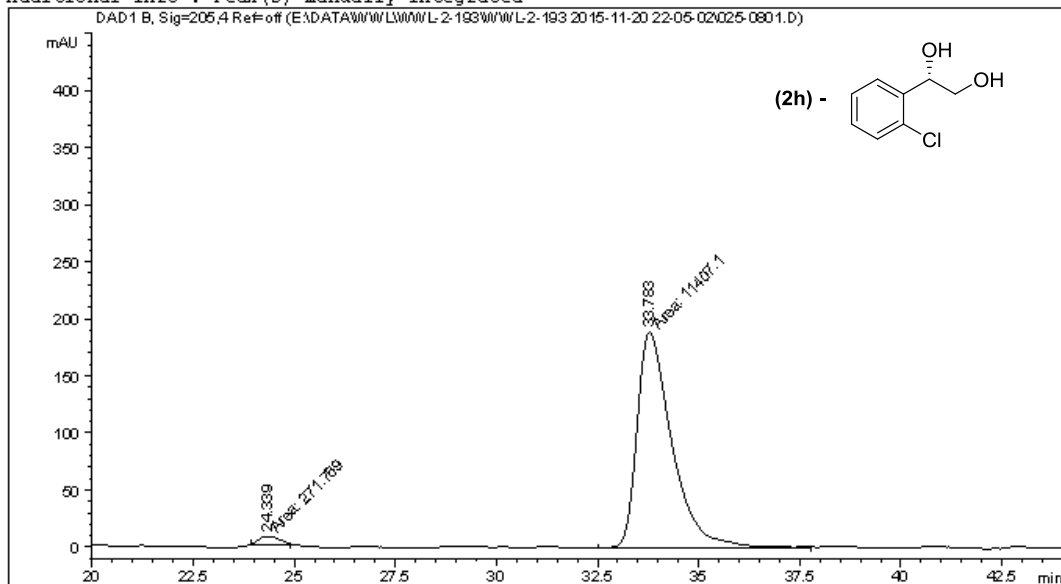

Area Percent Report

```
Sorted By      :      Signal
Multiplier     :      1.0000
Dilution       :      1.0000
Do not use Multiplier & Dilution Factor with ISTDs
```

Signal 1: DAD1 B, Sig=205,4 Ref=off

| Peak # | RetTime [min] | Type | Width [min] | Area [mAU*s] | Height [mAU] | Area %  |
|--------|---------------|------|-------------|--------------|--------------|---------|
| 1      | 24.339        | MM   | 0.5992      | 271.76947    | 7.55986      | 2.3270  |
| 2      | 33.783        | MM   | 1.0035      | 1.14071e4    | 189.45425    | 97.6730 |

Totals : 1.16789e4 197.01411

\*\*\* End of Report \*\*\*



```
=====
Acq. Operator   : SYSTEM                      Seq. Line :    7
Acq. Instrument : 1260HPLC-DAD                Location  : Vial 75
Injection Date  : 12/8/2015 11:37:37 PM       Inj       :    1
                                           Inj Volume: 1.000 µl
Acq. Method     : E:\DATA\WVL\XY-20151208-20\XY-20151208-20(0D) 2015-12-08 19:45-04\DAD-0D
                                           (1-2)-98-2-1.OML-205-250NM-50MIN.M
Last changed    : 12/8/2015 9:36:56 PM by SYSTEM
Analysis Method : E:\DATA\WVL\XY-20151208-20\XY-20151208-20(0D) 2015-12-08 19:45-04\DAD-0D
                                           (1-2)-98-2-1.OML-205-250NM-50MIN.M (Sequence Method)
Last changed    : 12/11/2015 10:00:02 AM by SYSTEM
                                           (modified after loading)
Additional Info : Peak(s) manually integrated
=====
```

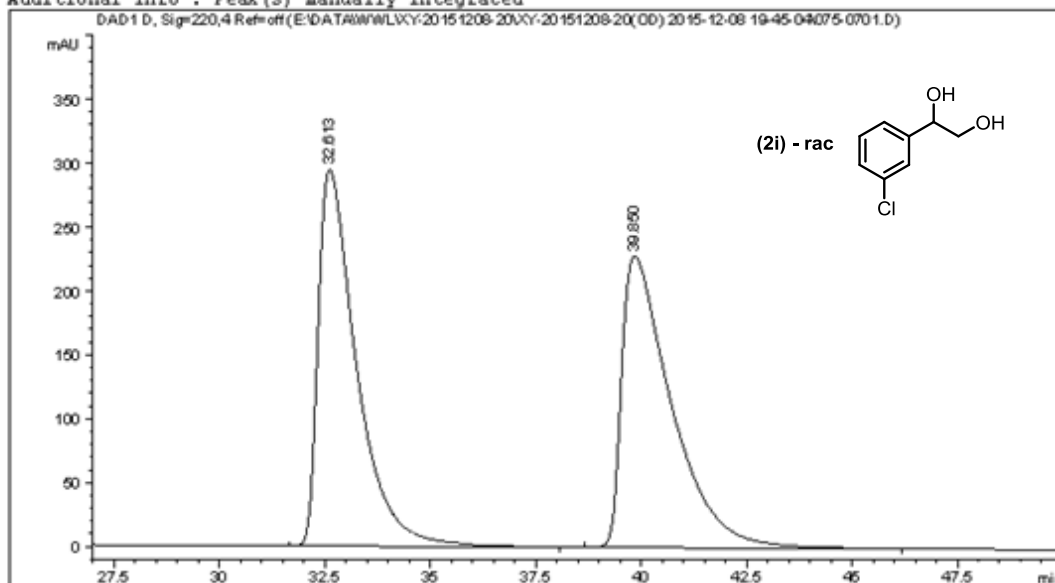

Area Percent Report

```
Sorted By      : Signal
Multiplier     : 1.0000
Dilution       : 1.0000
Do not use Multiplier & Dilution Factor with ISTDs
```

Signal 1: DAD1 D, Sig=220,4 Ref=off

| Peak # | RetTime [min] | Type | Width [min] | Area [mAU*s] | Height [mAU] | Area %  |
|--------|---------------|------|-------------|--------------|--------------|---------|
| 1      | 32.613        | BB   | 0.9388      | 1.86265e4    | 294.94156    | 49.8364 |
| 2      | 39.850        | BB   | 1.1878      | 1.87488e4    | 227.90480    | 50.1636 |

Totals : 3.73753e4 522.84636

\*\*\* End of Report \*\*\*

```
=====
Acq. Operator   : SYSTEM                      Seq. Line :    8
Acq. Instrument : 1260HPLC-DAD                Location  : Vial 76
Injection Date  : 12/9/2015 12:28:31 AM       Inj       :    1
                                           Inj Volume: 1.000 µl
Acq. Method     : E:\DATA\WVL\XY-20151208-20\XY-20151208-20(0D) 2015-12-08 19:45:04\DAD-0D
                                           (1-2)-98-2-1.0ML-205-250NM-50MIN.M
Last changed    : 12/8/2015 9:36:56 PM by SYSTEM
Analysis Method : E:\DATA\WVL\XY-20151208-20\XY-20151208-20(0D) 2015-12-08 19:45:04\DAD-0D
                                           (1-2)-98-2-1.0ML-205-250NM-50MIN.M (Sequence Method)
Last changed    : 12/13/2015 3:54:56 PM by SYSTEM
                                           (modified after loading)
Additional Info : Peak(s) manually integrated
```

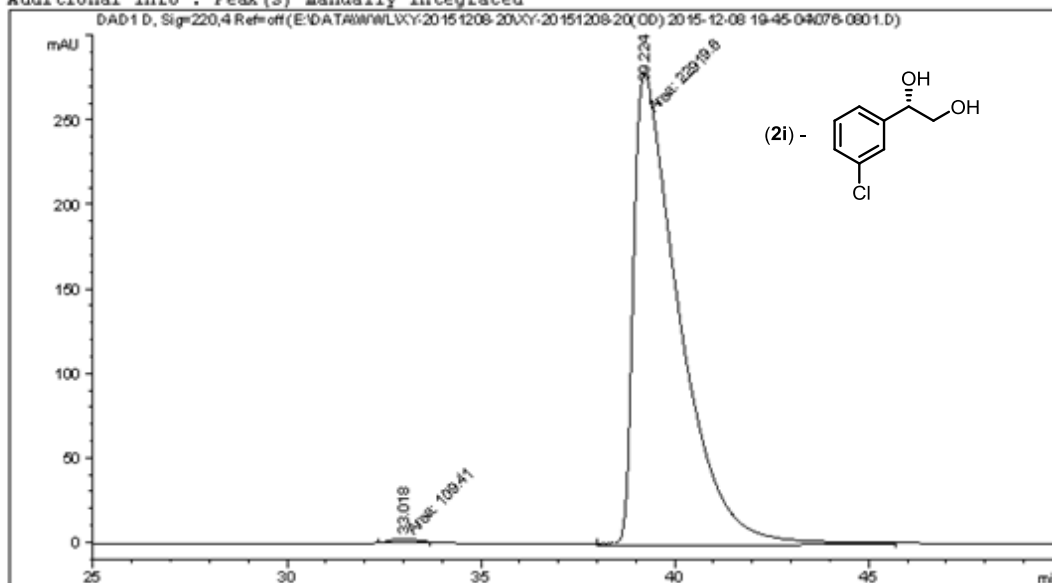

# Area Percent Report

```
Sorted By      : Signal
Multiplier     : 1.0000
Dilution       : 1.0000
Do not use Multiplier & Dilution Factor with ISTDs
```

Signal 1: DAD1 D, Sig=220,4 Ref=off

| Peak # | RetTime [min] | Type | Width [min] | Area [mAU*s] | Height [mAU] | Area %  |
|--------|---------------|------|-------------|--------------|--------------|---------|
| 1      | 33.018        | MM   | 0.7659      | 109.41030    | 2.38079      | 0.4751  |
| 2      | 39.224        | MM   | 1.3679      | 2.29196e4    | 279.26505    | 99.5249 |

Totals : 2.30290e4 281.64583

\*\*\* End of Report \*\*\*

```
=====
Acq. Operator   : SYSTEM                      Seq. Line :    4
Acq. Instrument : 1260HPLC-DAD                Location  : Vial 66
Injection Date  : 12/28/2015 11:22:12 PM      Inj       :    1
                                           Inj Volume: 1.000 µl
Acq. Method     : E:\DATA\WWL\WWL-SAIFEN-CF3-DIOL-RAC\WWL-2-SAIFEN-DICF3-DIOL-RAC-1 2015-
12-28 21-52-26\DAD-OD(1-2)-98-2-1.OML-205-250NM-60MIN.M
Last changed    : 12/28/2015 10:19:13 PM by SYSTEM
Analysis Method : E:\DATA\WWL\WWL-SAIFEN-CF3-DIOL-RAC\WWL-2-SAIFEN-DICF3-DIOL-RAC-1 2015-
12-28 21-52-26\DAD-OD(1-2)-98-2-1.OML-205-250NM-60MIN.M (Sequence Method
)
Last changed    : 12/29/2015 9:30:34 AM by SYSTEM
(modified after loading)
Additional Info  : Peak(s) manually integrated
=====
```

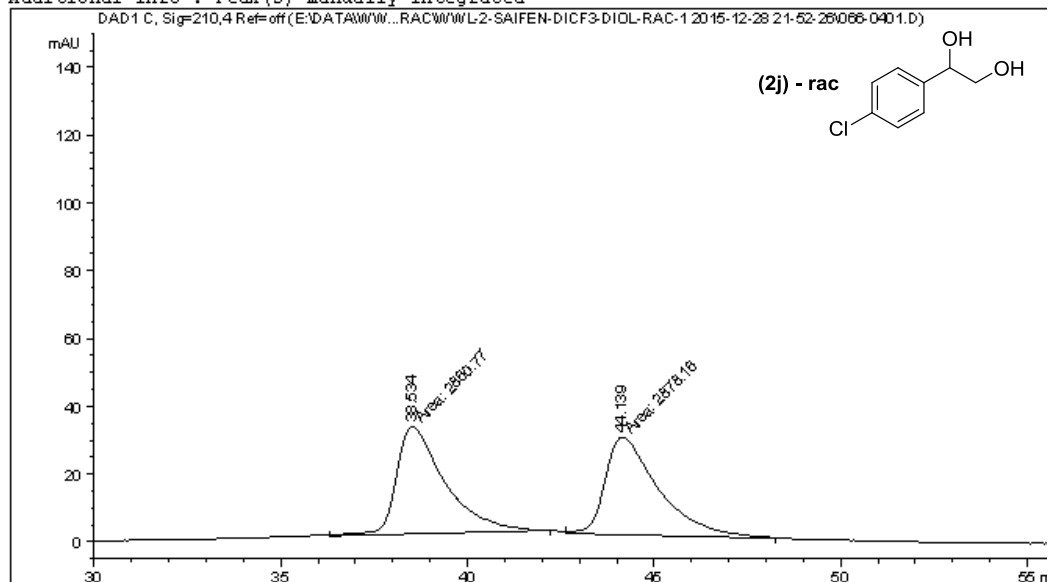

Area Percent Report

```
Sorted By      :      Signal
Multiplier     :      1.0000
Dilution       :      1.0000
Do not use Multiplier & Dilution Factor with ISTDs
```

Signal 1: DAD1 C, Sig=210,4 Ref=off

| Peak # | RetTime [min] | Type | Width [min] | Area [mAU*s] | Height [mAU] | Area %  |
|--------|---------------|------|-------------|--------------|--------------|---------|
| 1      | 38.534        | MM   | 1.5068      | 2860.77344   | 31.64202     | 49.8485 |
| 2      | 44.139        | MM   | 1.6673      | 2878.15674   | 28.77144     | 50.1515 |

Totals : 5738.93018 60.41346

```
=====
Acq. Operator   : SYSTEM                      Seq. Line :   13
Acq. Instrument : 1260HPLC-DAD                Location  : Vial 70
Injection Date  : 11/11/2015 5:22:36 AM        Inj       :    1
                                           Inj Volume: 1.000 µl
Acq. Method     : E:\DATA\WVL\WVL-2-183-184\WVL-2-183-184 2015-11-10 20-57-01\DAD-0D-98-2-
                  - (1-2)1M-220NM-50MIN.M
Last changed    : 11/10/2015 8:57:02 PM by SYSTEM
Analysis Method : E:\DATA\WVL\WVL-2-183-184\WVL-2-183-184 2015-11-10 20-57-01\DAD-0D-98-2-
                  - (1-2)1M-220NM-50MIN.M (Sequence Method)
Last changed    : 12/13/2015 3:05:50 PM by SYSTEM
                  (modified after loading)
Additional Info : Peak(s) manually integrated
DAD1 A, Sig=220,4 Ref=off (E:\DATA\WVL\WVL-2-183-184\WVL-2-183-184 2015-11-10 20-57-01\070-1301.D)
```

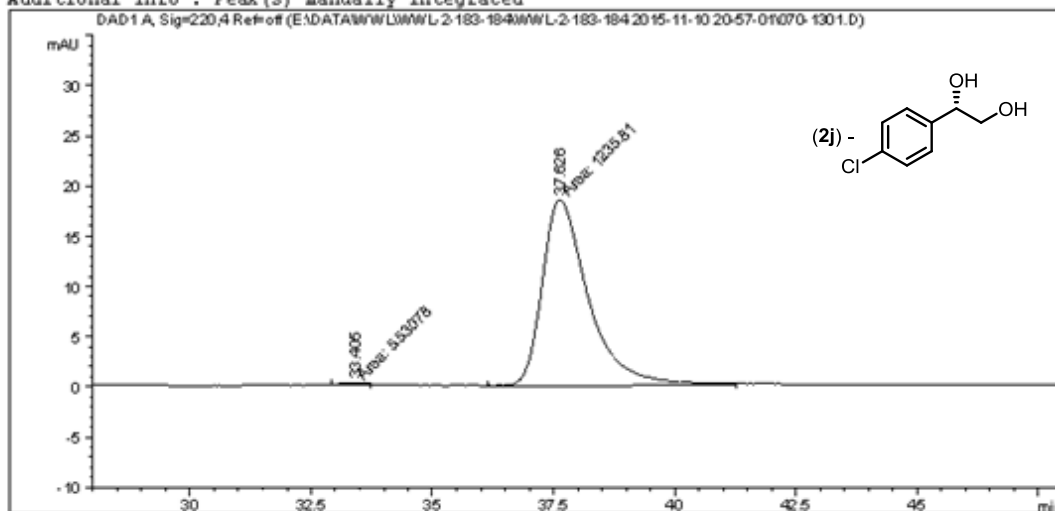

# Area Percent Report

```
Sorted By      :      Signal
Multiplier     :      1.0000
Dilution       :      1.0000
Do not use Multiplier & Dilution Factor with ISTDs
```

Signal 1: DAD1 A, Sig=220,4 Ref=off

| Peak # | RetTime [min] | Type | Width [min] | Area [mAU*s] | Height [mAU] | Area %  |
|--------|---------------|------|-------------|--------------|--------------|---------|
| 1      | 33.405        | MM   | 0.6085      | 5.53078      | 1.51494e-1   | 0.4455  |
| 2      | 37.626        | MM   | 1.1096      | 1235.81067   | 18.56190     | 99.5545 |

Totals : 1241.34145 18.71339

\*\*\* End of Report \*\*\*

```
=====
Acq. Operator   : SYSTEM                      Seq. Line :   11
Acq. Instrument : 1260HPLC-DAD                Location  : Vial 63
Injection Date  : 12/18/2015 5:02:42 PM       Inj       :    1
                                           Inj Volume: 1.000 µl
Acq. Method     : E:\DATA\LXX\0-BR-BZ\20151218 2015-12-18 10-53-42\DAD-0D (1-2)-98-2-1.0ML-
                  205-250NM-70MIN.M
Last changed    : 12/18/2015 11:42:07 AM by SYSTEM
Analysis Method : E:\DATA\LXX\0-BR-BZ\20151218 2015-12-18 10-53-42\DAD-0D (1-2)-98-2-1.0ML-
                  205-250NM-70MIN.M (Sequence Method)
Last changed    : 12/19/2015 2:32:45 PM by SYSTEM
                  (modified after loading)
Additional Info : Peak(s) manually integrated
=====
```

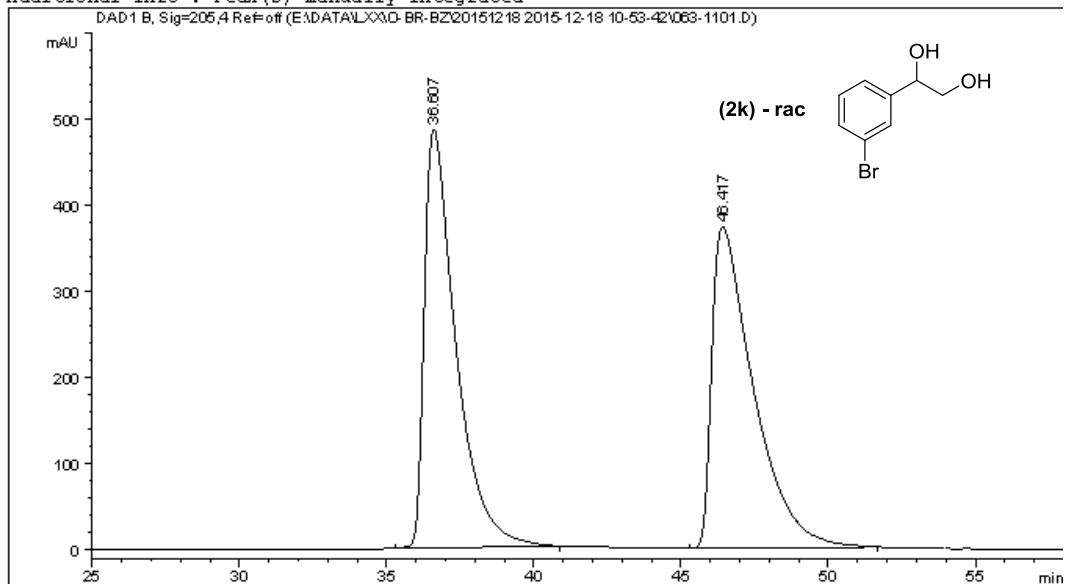

=====  
Area Percent Report  
=====

Sorted By : Signal  
Multiplier : 1.0000  
Dilution : 1.0000  
Do not use Multiplier & Dilution Factor with ISTDs

Signal 1: DAD1 B, Sig=205,4 Ref=off

| Peak # | RetTime [min] | Type | Width [min] | Area [mAU*s] | Height [mAU] | Area %  |
|--------|---------------|------|-------------|--------------|--------------|---------|
| 1      | 36.607        | BB   | 1.0250      | 3.62365e4    | 486.46805    | 49.7070 |
| 2      | 46.417        | BB   | 1.3081      | 3.66637e4    | 373.85541    | 50.2930 |

Totals : 7.29002e4 860.32346

=====  
\*\*\* End of Report \*\*\*

```
=====
Acq. Operator   : SYSTEM                      Seq. Line :   20
Acq. Instrument : 1260HPLC-DAD                Location  : Vial 82
Injection Date  : 12/24/2015 7:41:59 PM       Inj       :    1
                                           Inj Volume: 1.000 µl
Acq. Method     : E:\DATA\LXX\6-COOME\LXX-2-150S 2015-12-24 08-30-00\DAD-0D(1-2)-98-2-1.
                                           OML-205-250NM-60MIN.M
Last changed    : 12/24/2015 8:30:01 AM by SYSTEM
Analysis Method : E:\DATA\LXX\6-COOME\LXX-2-150S 2015-12-24 08-30-00\DAD-0D(1-2)-98-2-1.
                                           OML-205-250NM-60MIN.M (Sequence Method)
Last changed    : 12/25/2015 9:20:23 AM by SYSTEM
                                           (modified after loading)
Additional Info : Peak(s) manually integrated
=====
```

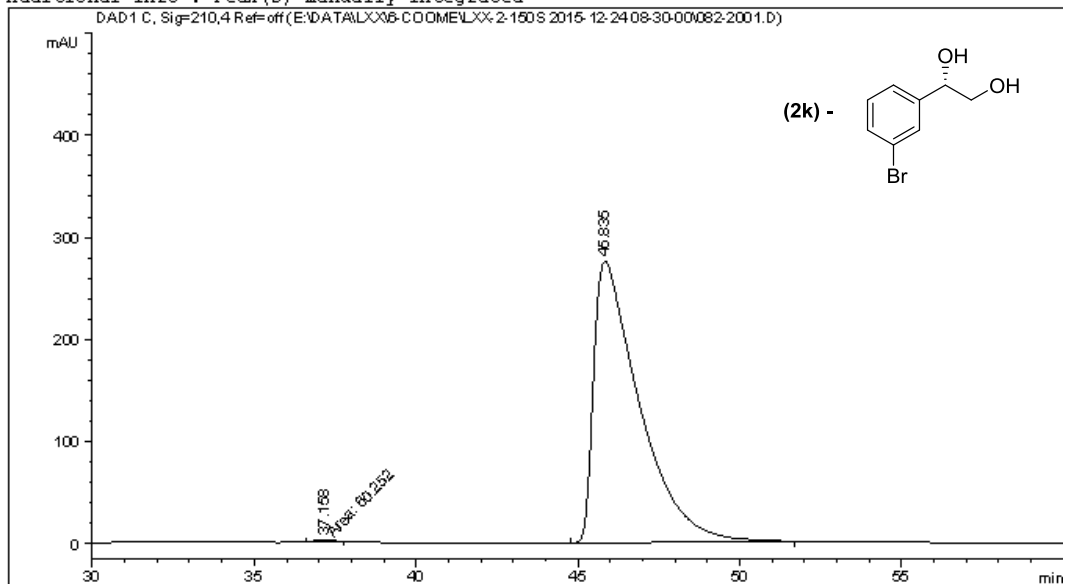

=====  
Area Percent Report  
=====

```
Sorted By      :      Signal
Multiplier     :      1.0000
Dilution       :      1.0000
Do not use Multiplier & Dilution Factor with ISTDs
```

Signal 1: DAD1 C, Sig=210,4 Ref=off

| Peak # | RetTime [min] | Type | Width [min] | Area [mAU*s] | Height [mAU] | Area %  |
|--------|---------------|------|-------------|--------------|--------------|---------|
| 1      | 37.158        | MM   | 0.7118      | 60.25197     | 1.41084      | 0.2220  |
| 2      | 45.835        | BB   | 1.3407      | 2.70799e4    | 275.99332    | 99.7780 |

Totals :                    2.71402e4    277.40416

=====  
\*\*\* End of Report \*\*\*

=====

|                 |                                                                                                              |            |            |
|-----------------|--------------------------------------------------------------------------------------------------------------|------------|------------|
| Acq. Operator   | : SYSTEM                                                                                                     | Seq. Line  | : 9        |
| Acq. Instrument | : 1260HPLC-DAD                                                                                               | Location   | : Vial 47  |
| Injection Date  | : 12/12/2015 6:00:43 PM                                                                                      | Inj        | : 1        |
|                 |                                                                                                              | Inj Volume | : 1.000 µl |
| Acq. Method     | : E:\DATA\WVL\XY-1-23\XY-1-23 2015-12-12 13:39:51\DAD-0D(1-2)-98-2-1.OML-205-250NM-60MIN.M                   |            |            |
| Last changed    | : 12/12/2015 1:39:51 PM by SYSTEM                                                                            |            |            |
| Analysis Method | : E:\DATA\WVL\XY-1-23\XY-1-23 2015-12-12 13:39:51\DAD-0D(1-2)-98-2-1.OML-205-250NM-60MIN.M (Sequence Method) |            |            |
| Last changed    | : 12/12/2015 8:52:24 PM by SYSTEM<br>(modified after loading)                                                |            |            |

Additional Info : Peak(s) manually integrated

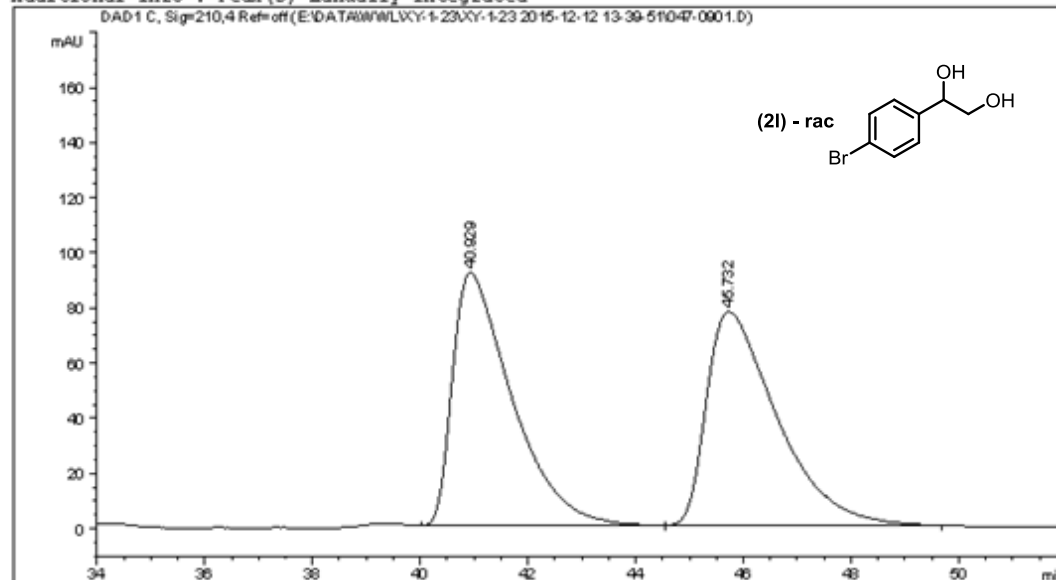

=====  
Area Percent Report  
=====

Sorted By : Signal  
Multiplier : 1.0000  
Dilution : 1.0000  
Do not use Multiplier & Dilution Factor with ISTDs

Signal 1: DAD1 C, Sig=210,4 Ref=off

| Peak # | RetTime [min] | Type | Width [min] | Area [mAU*s] | Height [mAU] | Area %  |
|--------|---------------|------|-------------|--------------|--------------|---------|
| 1      | 40.929        | BB   | 1.0949      | 7029.29102   | 91.64479     | 49.8686 |
| 2      | 45.732        | BB   | 1.2421      | 7066.34326   | 77.47694     | 50.1314 |

Totals : 1.40956e4 169.12173

=====  
\*\*\* End of Report \*\*\*

```
=====
Acq. Operator   : SYSTEM                      Seq. Line :   17
Acq. Instrument : 1260HPLC-DAD                Location  : Vial 46
Injection Date  : 12/15/2015 5:00:10 AM       Inj       :    1
                                           Inj Volume: 1.000 µl
Acq. Method     : E:\DATA\DX\ZXB-206\ZXB-206(RAC-OD) 2015-12-14 19-57-50\DAD-OD(1-2)-98-2-
                  1.OML-205-250NM-60MIN.M
Last changed    : 12/14/2015 8:13:47 PM by SYSTEM
Analysis Method : E:\DATA\DX\ZXB-206\ZXB-206(RAC-OD) 2015-12-14 19-57-50\DAD-OD(1-2)-98-2-
                  1.OML-205-250NM-60MIN.M (Sequence Method)
Last changed    : 12/15/2015 9:43:58 AM by SYSTEM
                  (modified after loading)
Additional Info : Peak(s) manually integrated
```

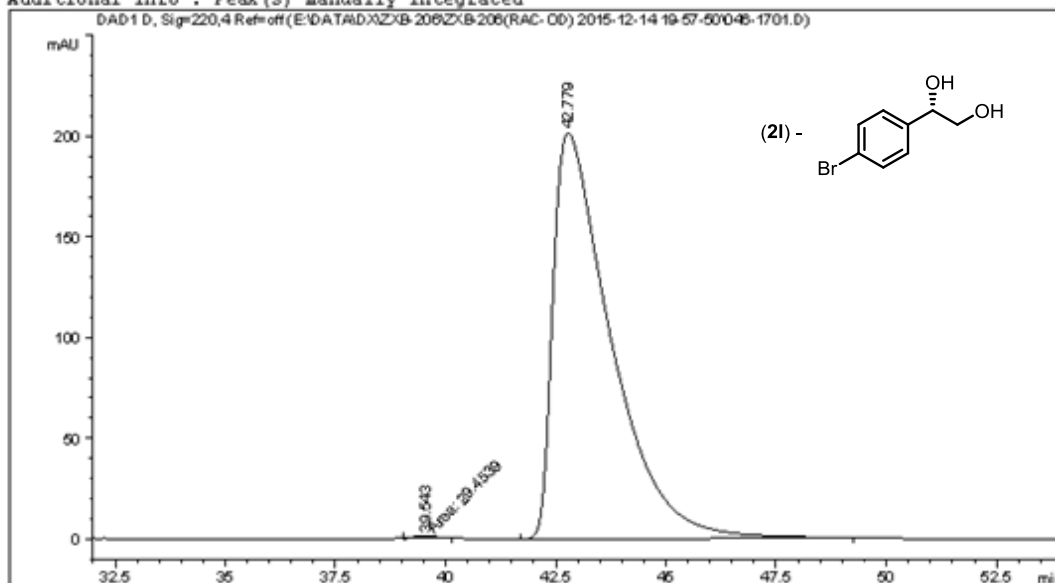

# Area Percent Report

```
Sorted By      : Signal
Multiplier     : 1.0000
Dilution       : 1.0000
Do not use Multiplier & Dilution Factor with ISTDs
```

Signal 1: DAD1 D, Sig=220,4 Ref=off

| Peak # | RetTime [min] | Type | Width [min] | Area [mAU*s] | Height [mAU] | Area %  |
|--------|---------------|------|-------------|--------------|--------------|---------|
| 1      | 39.543        | MM   | 0.6973      | 29.45387     | 7.03989e-1   | 0.1596  |
| 2      | 42.779        | BB   | 1.3032      | 1.84263e4    | 201.43111    | 99.8404 |

Totals : 1.84557e4 202.13510

\*\*\* End of Report \*\*\*



```
=====
Acq. Operator   : SYSTEM                      Seq. Line :   10
Acq. Instrument : 1260HPLC-DAD                Location  : Vial 88
Injection Date  : 5/31/2015 2:30:44 AM         Inj       :    1
                                           Inj Volume: 5.000 µl
Acq. Method     : E:\DATA\YC\YC-20150530\YC-RAC-0530 2015-05-30 21-53-45\
DAD-ODH-98-2-1ML-35MIN(1-2).M
Last changed    : 5/30/2015 10:38:28 PM by SYSTEM
Analysis Method : E:\DATA\YC\YC-20150530\YC-RAC-0530 2015-05-30 21-53-45\
DAD-ODH-98-2-1ML-35MIN(1-2).M (Sequence Method)
Last changed    : 12/9/2015 9:45:29 PM by SYSTEM
                  (modified after loading)
Additional Info : Peak(s) manually integrated
DAD1 C, Sig=210,4 Ref=off(E:\DATA\YC\YC-20150530\YC-RAC-0530 2015-05-30 21-53-45\088-1001.D)
=====
```

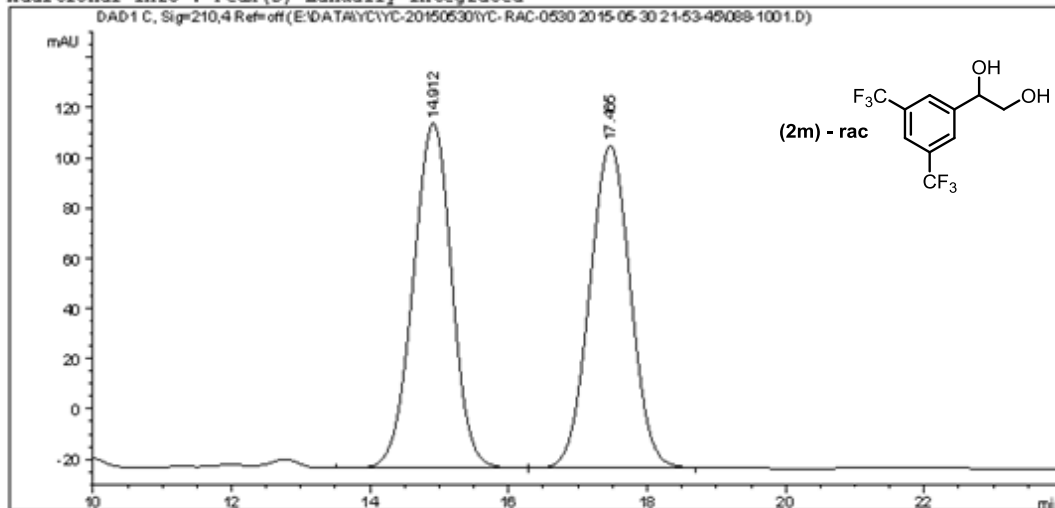

# Area Percent Report

```
Sorted By      :      Signal
Multiplier     :      1.0000
Dilution       :      1.0000
Do not use Multiplier & Dilution Factor with ISTDs
```

Signal 1: DAD1 C, Sig=210,4 Ref=off

| Peak # | RetTime [min] | Type | Width [min] | Area [mAU*s] | Height [mAU] | Area %  |
|--------|---------------|------|-------------|--------------|--------------|---------|
| 1      | 14.912        | BB   | 0.6045      | 5326.47266   | 137.34102    | 50.3844 |
| 2      | 17.465        | BB   | 0.6408      | 5245.19385   | 128.33156    | 49.6156 |

Totals : 1.05717e4 265.67258

\*\*\* End of Report \*\*\*

Data File E:\DATA\WWL\WWL-2-183-184\WWL-2-183-184 2015-11-10 20-57-01\071-1401.D  
Sample Name: ww1-2-183-11

```
=====
Acq. Operator   : SYSTEM                      Seq. Line :   14
Acq. Instrument : 1260HPLC-DAD                Location  : Vial 71
Injection Date  : 11/11/2015 6:13:32 AM        Inj       :    1
                                           Inj Volume: 1.000 µl
Acq. Method     : E:\DATA\WWL\WWL-2-183-184\WWL-2-183-184 2015-11-10 20-57-01\DAD-OD-98-2-
                  - (1-2)1M-220NM-50MIN.M
Last changed    : 11/10/2015 8:57:02 PM by SYSTEM
Analysis Method : E:\DATA\WWL\WWL-2-183-184\WWL-2-183-184 2015-11-10 20-57-01\DAD-OD-98-2-
                  - (1-2)1M-220NM-50MIN.M (Sequence Method)
Last changed    : 1/12/2016 10:40:35 AM by SYSTEM
                  (modified after loading)
Additional Info : Peak(s) manually integrated
=====
```

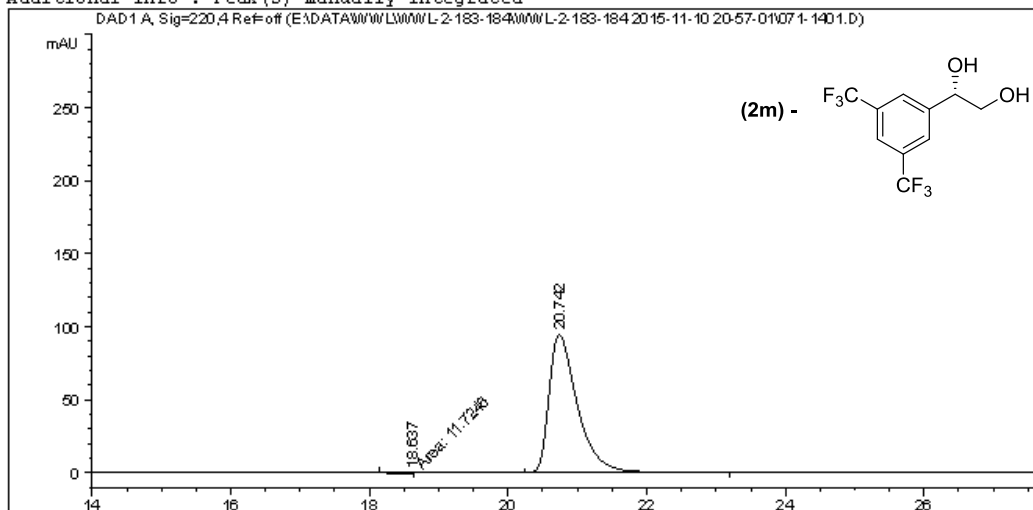

# Area Percent Report

```
Sorted By      :      Signal
Multiplier     :      1.0000
Dilution       :      1.0000
Do not use Multiplier & Dilution Factor with ISTDs
```

Signal 1: DAD1 A, Sig=220,4 Ref=off

| Peak # | RetTime [min] | Type | Width [min] | Area [mAU*s] | Height [mAU] | Area %  |
|--------|---------------|------|-------------|--------------|--------------|---------|
| 1      | 18.637        | MM   | 0.3426      | 11.72463     | 5.70442e-1   | 0.4352  |
| 2      | 20.742        | BB   | 0.4275      | 2682.45239   | 94.39999     | 99.5648 |

Totals : 2694.17702 94.97044

\*\*\* End of Report \*\*\*

Data File E:\DATA\WVL\WVL-185RAC\WVL-2-185RACS 2015-11-12 14-23-48\003-0501.D  
Sample Name: WVL-NAI-RAC

```
=====
Acq. Operator   : SYSTEM                      Seq. Line :    5
Acq. Instrument : 1260HPLC-DAD                Location  : Vial 3
Injection Date  : 11/12/2015 4:39:33 PM        Inj       :    1
                                           Inj Volume: 1.000 µl
Acq. Method     : E:\DATA\WVL\WVL-185RAC\WVL-2-185RACS 2015-11-12 14-23-48\
DAD-OD(1-2)-70-30-0.5ML-ALLNM-40MIN.M
Last changed    : 11/12/2015 2:23:48 PM by SYSTEM
Analysis Method : E:\DATA\WVL\WVL-185RAC\WVL-2-185RACS 2015-11-12 14-23-48\
DAD-OD(1-2)-70-30-0.5ML-ALLNM-40MIN.M (Sequence Method)
Last changed    : 12/11/2015 4:04:59 PM by SYSTEM
(modified after loading)
Additional Info  : Peak(s) manually integrated
=====
```

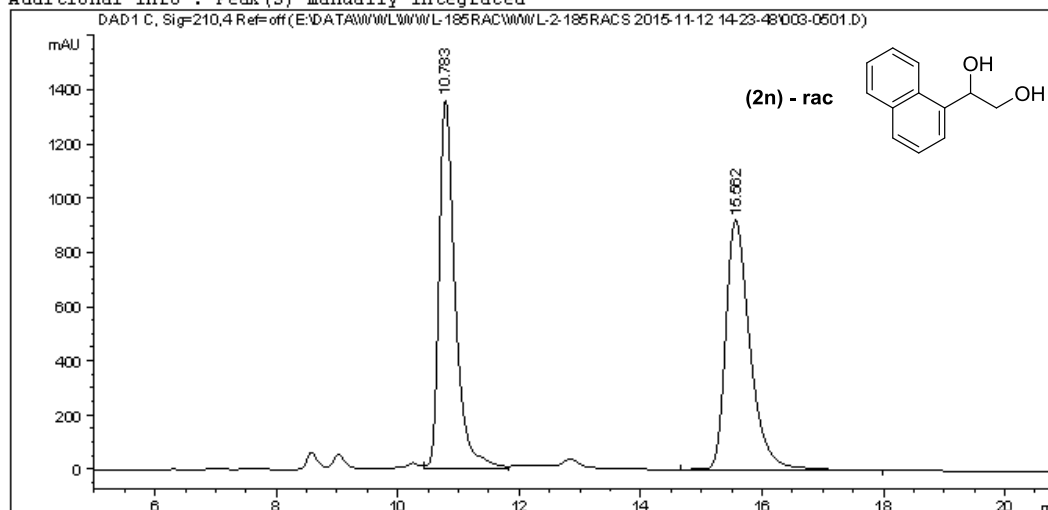

# Area Percent Report

```
Sorted By      :      Signal
Multiplier     :      1.0000
Dilution       :      1.0000
Do not use Multiplier & Dilution Factor with ISTDs
```

Signal 1: DAD1 C, Sig=210,4 Ref=off

| Peak # | RetTime [min] | Type | Width [min] | Area [mAU*s] | Height [mAU] | Area %  |
|--------|---------------|------|-------------|--------------|--------------|---------|
| 1      | 10.783        | VV   | 0.2765      | 2.49964e4    | 1359.38037   | 49.4576 |
| 2      | 15.562        | BB   | 0.4220      | 2.55446e4    | 919.91034    | 50.5424 |

Totals : 5.05410e4 2279.29071

\*\*\* End of Report \*\*\*

```
=====
Acq. Operator   : SYSTEM                      Seq. Line :   29
Acq. Instrument : 1260HPLC-DAD                Location  : Vial 89
Injection Date  : 12/24/2015 11:55:19 PM      Inj       :    1
                                           Inj Volume: 1.000 µl
Acq. Method     : E:\DATA\LXX\6-COOME\LXX-2-150S 2015-12-24 08-30-00\
                    SML-205-250NM-20MIN.M
Last changed    : 12/24/2015 8:30:02 AM by SYSTEM
Analysis Method : E:\DATA\LXX\6-COOME\LXX-2-150S 2015-12-24 08-30-00\
                    SML-205-250NM-20MIN.M (Sequence Method)
Last changed    : 12/25/2015 9:54:57 AM by SYSTEM
                    (modified after loading)
Additional Info  : Peak(s) manually integrated
=====
```

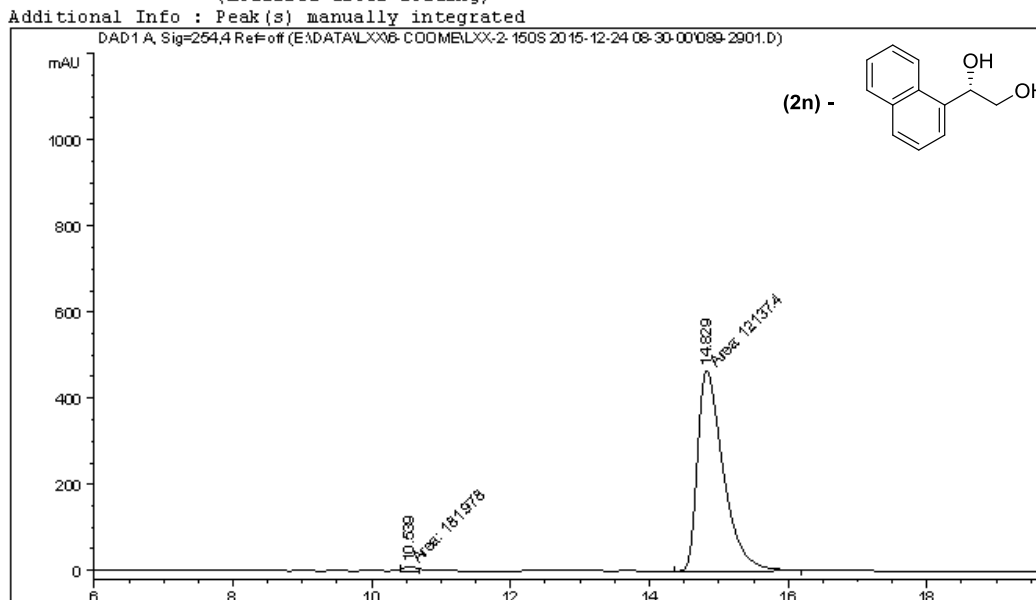

# Area Percent Report

```
=====
Sorted By       : Signal
Multiplier      : 1.0000
Dilution        : 1.0000
Do not use Multiplier & Dilution Factor with ISTDs
=====
```

Signal 1: DAD1 A, Sig=254,4 Ref=off

| Peak # | RetTime [min] | Type | Width [min] | Area [mAU*s] | Height [mAU] | Area %  |
|--------|---------------|------|-------------|--------------|--------------|---------|
| 1      | 10.539        | MM   | 0.2247      | 181.97768    | 13.49828     | 1.4772  |
| 2      | 14.829        | MM   | 0.4325      | 1.21374e4    | 467.76807    | 98.5228 |

Totals : 1.23194e4 481.26634

\*\*\* End of Report \*\*\*

=====

|                 |                                                              |            |            |
|-----------------|--------------------------------------------------------------|------------|------------|
| Acq. Operator   | : SYSTEM                                                     | Seq. Line  | : 14       |
| Acq. Instrument | : 1260HPLC-DAD                                               | Location   | : Vial 50  |
| Injection Date  | : 12/12/2015 9:04:11 PM                                      | Inj        | : 1        |
|                 |                                                              | Inj Volume | : 1.000 µl |
| Acq. Method     | : E:\DATA\WUL\XY-1-23\XY-1-23 2015-12-12 13-39-51\050-1401.D |            |            |
|                 | ALLNH-40MIN.M                                                |            |            |
| Last changed    | : 12/12/2015 9:31:32 PM by SYSTEM                            |            |            |
|                 | (modified after loading)                                     |            |            |
| Analysis Method | : C:\CHEM32\2\METHODS\DEF_LC.M                               |            |            |
| Last changed    | : 12/12/2015 9:44:20 PM by SYSTEM                            |            |            |
|                 | (modified after loading)                                     |            |            |

=====

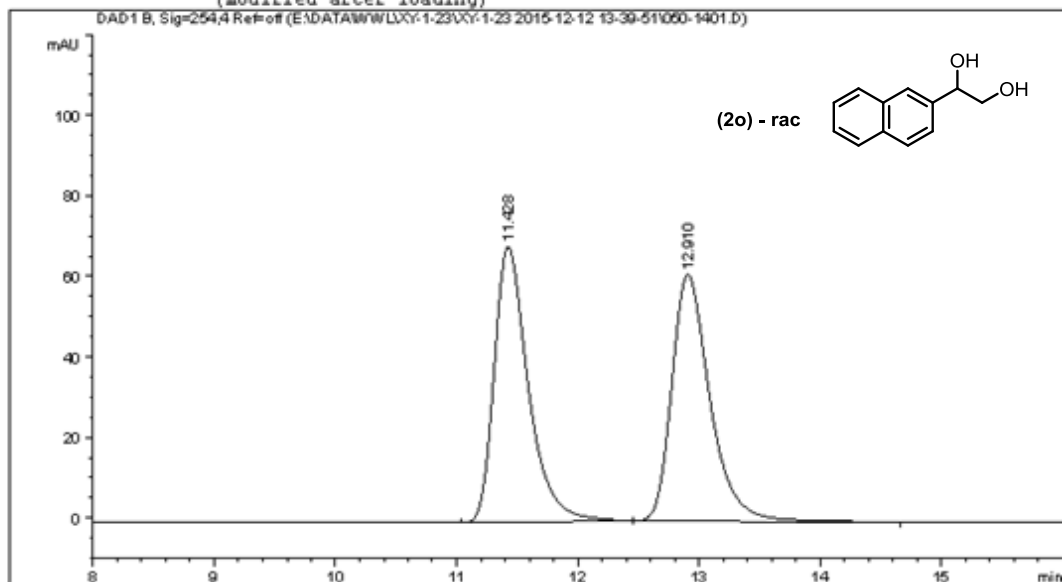

=====  
Area Percent Report  
=====

Sorted By : Signal  
Multiplier : 1.0000  
Dilution : 1.0000  
Do not use Multiplier & Dilution Factor with ISTDs

Signal 1: DAD1 B, Sig=254,4 Ref=off

| Peak # | RetTime [min] | Type | Width [min] | Area [mAU*s] | Height [mAU] | Area %  |
|--------|---------------|------|-------------|--------------|--------------|---------|
| 1      | 11.428        | BB   | 0.2963      | 1337.25781   | 68.33035     | 49.9171 |
| 2      | 12.910        | BB   | 0.3339      | 1341.69885   | 61.17166     | 50.0829 |

Totals : 2678.95667 129.50200

=====  
\*\*\* End of Report \*\*\*

```
=====
Acq. Operator   : SYSTEM                      Seq. Line :   15
Acq. Instrument : 1260HPLC-DAD                Location  : Vial 29
Injection Date  : 11/21/2015 4:37:38 AM        Inj       :    1
                                           Inj Volume: 1.000 µl
Acq. Method     : E:\DATA\WVL\WVL-2-193\WVL-2-193 2015-11-20 22-05-02\029-1501.D
                                           SML-205-250NM-20MIN.M
Last changed    : 11/20/2015 10:05:03 PM by SYSTEM
Analysis Method : E:\DATA\WVL\WVL-2-193\WVL-2-193 2015-11-20 22-05-02\029-1501.D
                                           SML-205-250NM-20MIN.M (Sequence Method)
Last changed    : 12/13/2015 3:45:04 PM by SYSTEM
                                           (modified after loading)
Additional Info : Peak(s) manually integrated
=====
```

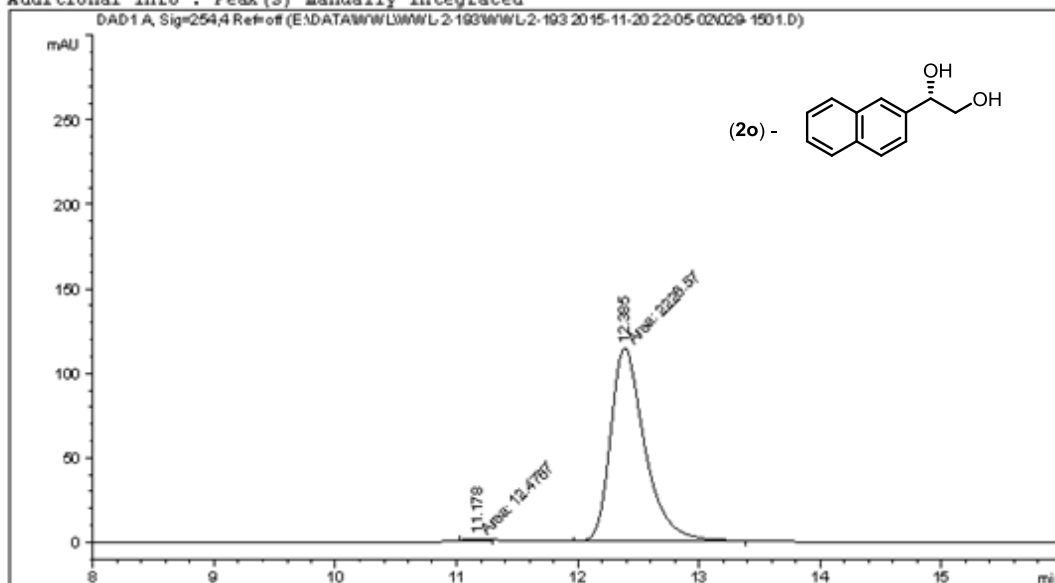

# Area Percent Report

```
Sorted By      : Signal
Multiplier     : 1.0000
Dilution       : 1.0000
Do not use Multiplier & Dilution Factor with ISTDs
```

Signal 1: DAD1 A, Sig=254.4 Ref=off

| Peak # | RetTime [min] | Type | Width [min] | Area [mAU*s] | Height [mAU] | Area %  |
|--------|---------------|------|-------------|--------------|--------------|---------|
| 1      | 11.178        | MM   | 0.1897      | 12.47672     | 1.09637      | 0.5572  |
| 2      | 12.385        | MM   | 0.3249      | 2226.56763   | 114.23113    | 99.4428 |

Totals : 2239.04434 115.32750

\*\*\* End of Report \*\*\*

```
=====
Acq. Operator   : SYSTEM                      Seq. Line :    8
Acq. Instrument : 1260HPLC-DAD                Location  : Vial 63
Injection Date  : 9/22/2015 2:35:52 PM        Inj       :    1
                                           Inj Volume: 1.000 µl
Acq. Method     : E:\DATA\WFY\WFY-1-170\DX20150921-ZXB-81 2015-09-22 11-07-21\DAD-0D(1-2)-
95-5-0.8ML-210NM-254NM-50MIN.M
Last changed    : 9/22/2015 11:24:41 AM by SYSTEM
Analysis Method : E:\DATA\WFY\WFY-1-170\DX20150921-ZXB-81 2015-09-22 11-07-21\DAD-0D(1-2)-
95-5-0.8ML-210NM-254NM-50MIN.M (Sequence Method)
Last changed    : 12/11/2015 10:46:41 AM by SYSTEM
(modified after loading)
Additional Info : Peak(s) manually integrated
DAD1 A, Sig=230,4 Ref=off (E:\DATA\WFY\WFY-1-170\DX20150921-ZXB-81 2015-09-22 11-07-21\063-0801.D)
=====
```

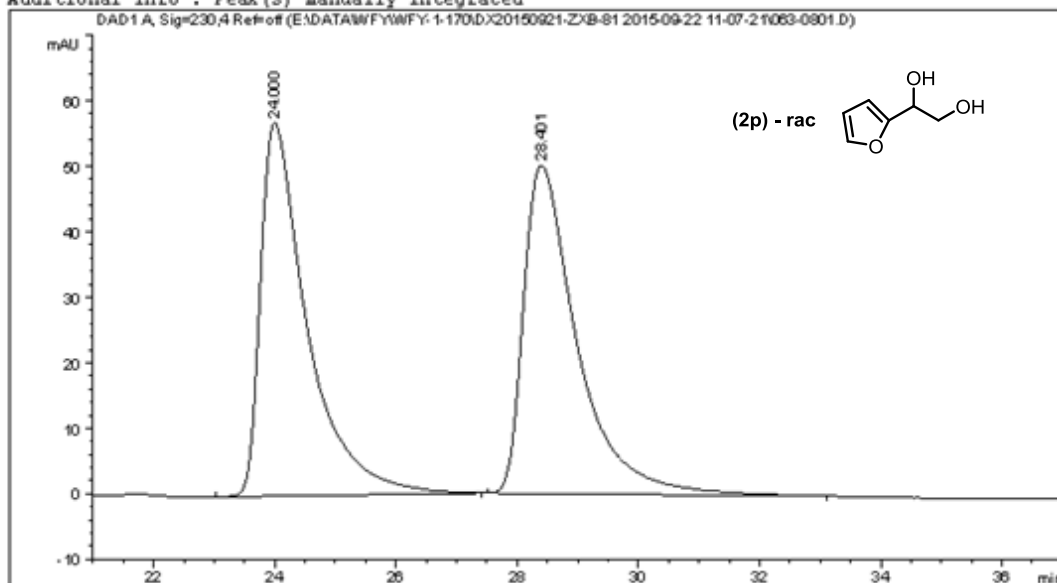

# Area Percent Report

```
Sorted By      : Signal
Multiplier     : 1.0000
Dilution       : 1.0000
Do not use Multiplier & Dilution Factor with ISTDs
```

Signal 1: DAD1 A, Sig=230,4 Ref=off

| Peak # | RetTime [min] | Type | Width [min] | Area [mAU*s] | Height [mAU] | Area %  |
|--------|---------------|------|-------------|--------------|--------------|---------|
| 1      | 24.000        | BB   | 0.7753      | 3055.60278   | 57.00809     | 49.8095 |
| 2      | 28.401        | BB   | 0.9044      | 3078.96948   | 50.14202     | 50.1905 |

Totals : 6134.57227 107.15011

\*\*\* End of Report \*\*\*

```
=====
Acq. Operator   : SYSTEM                      Seq. Line :   24
Acq. Instrument : 1260HPLC-DAD                Location  : Vial 50
Injection Date  : 12/15/2015 7:56:56 AM       Inj       :    1
                                           Inj Volume: 1.000 µl
Acq. Method     : E:\DATA\DX\ZXB-206\ZXB-206(RAC-OD) 2015-12-14 19-57-50\DAD-OD (1-2)-95-5-
                  0.8ML-210NM-254NM-50MIN.M
Last changed    : 12/14/2015 8:14:44 PM by SYSTEM
Analysis Method : E:\DATA\DX\ZXB-206\ZXB-206(RAC-OD) 2015-12-14 19-57-50\DAD-OD (1-2)-95-5-
                  0.8ML-210NM-254NM-50MIN.M (Sequence Method)
Last changed    : 12/15/2015 9:35:55 AM by SYSTEM
                  (modified after loading)
Additional Info : Peak(s) manually integrated
DAD1 A, Sig=230,4 Ref=off(E:\DATA\DX\ZXB-206\ZXB-206(RAC-OD) 2015-12-14 19-57-50\050-2401.D)
```

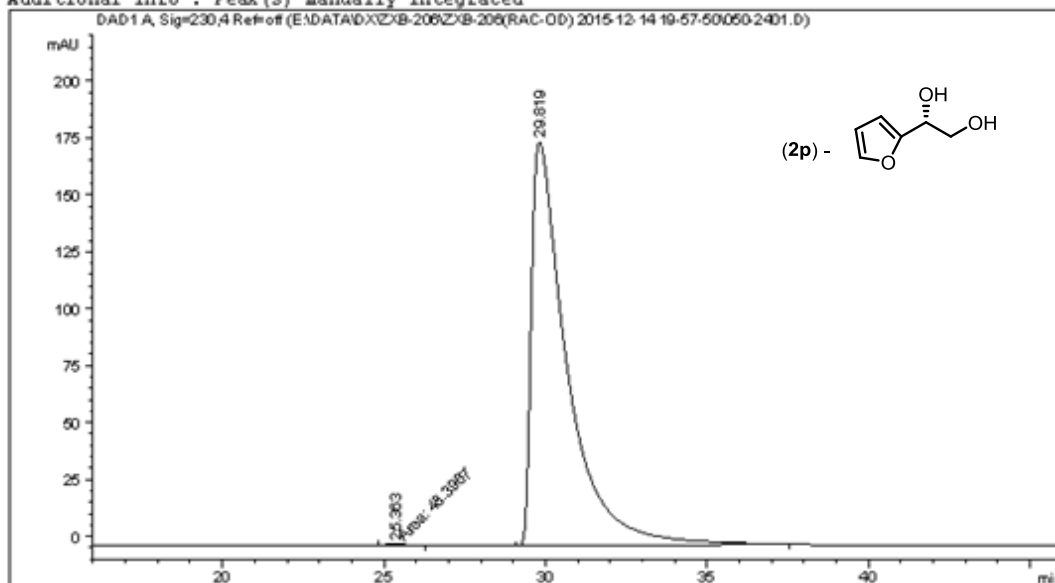

# Area Percent Report

```
Sorted By      : Signal
Multiplier     : 1.0000
Dilution       : 1.0000
Do not use Multiplier & Dilution Factor with ISTDs
```

Signal 1: DAD1 A, Sig=230,4 Ref=off

| Peak # | RetTime [min] | Type | Width [min] | Area [mAU*s] | Height [mAU] | Area %  |
|--------|---------------|------|-------------|--------------|--------------|---------|
| 1      | 25.363        | MM   | 1.1004      | 48.39669     | 7.32993e-1   | 0.3545  |
| 2      | 29.819        | BB   | 1.0627      | 1.36036e4    | 177.39224    | 99.6455 |

Totals : 1.36520e4 178.12524

\*\*\* End of Report \*\*\*



```
=====
Acq. Operator   : SYSTEM                      Seq. Line :   37
Acq. Instrument : 1260HPLC-DAD                Location  : Vial 69
Injection Date  : 5/30/2015 8:36:24 AM         Inj       :    1
                                           Inj Volume: 5.000 µl
Acq. Method     : E:\DATA\LP\LP20150529\LP20150529-1 2015-05-29 19-00-52\DAD-ODH-95-5-1ML-
                  30MIN(1-2).M
Last changed    : 5/30/2015 8:57:11 AM by SYSTEM
                  (modified after loading)
Analysis Method : E:\DATA\LP\LP20150529\LP20150529-1 2015-05-29 19-00-52\DAD-ODH-95-5-1ML-
                  30MIN(1-2).M (Sequence Method)
Last changed    : 1/16/2016 3:54:56 PM by SYSTEM
                  (modified after loading)
Additional Info : Peak(s) manually integrated
=====
```

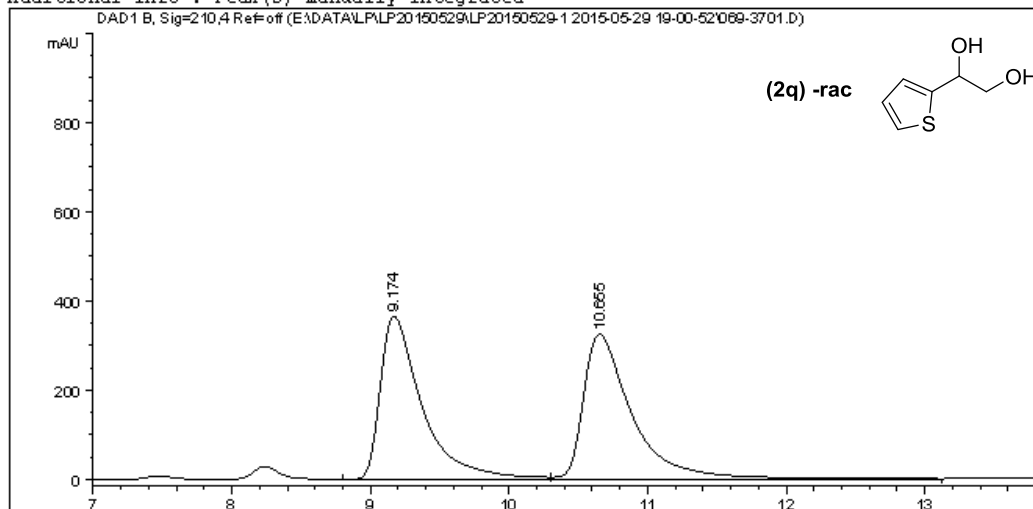

=====  
Area Percent Report  
=====

Sorted By : Signal  
Multiplier : 1.0000  
Dilution : 1.0000  
Do not use Multiplier & Dilution Factor with ISTDs

Signal 1: DAD1 B, Sig=210,4 Ref=off

| Peak # | RetTime [min] | Type | Width [min] | Area [mAU*s] | Height [mAU] | Area %  |
|--------|---------------|------|-------------|--------------|--------------|---------|
| 1      | 9.174         | BV   | 0.3086      | 7663.20947   | 365.43793    | 49.2618 |
| 2      | 10.655        | VB   | 0.3598      | 7892.88867   | 324.47595    | 50.7382 |

Totals : 1.55561e4 689.91388

=====  
\*\*\* End of Report \*\*\*

```
=====
Acq. Operator   : SYSTEM                      Seq. Line :    2
Acq. Instrument : 1260HPLC-DAD                Location  : Vial 11
Injection Date  : 10/5/2015 10:21:57 AM       Inj       :    1
                                           Inj Volume: 5.000 µl
Acq. Method     : E:\DATA\YJF\YJF-2-167\YJF-2-167RE-DAD-OD-95-5-1 2015-10-05 10-00-06\DAD-
                  OD(1-2)-95-5-1ML-220NM-254NM-20MIN.M
Last changed    : 10/5/2015 10:00:06 AM by SYSTEM
Analysis Method : E:\DATA\YJF\YJF-2-167\YJF-2-167RE-DAD-OD-95-5-1 2015-10-05 10-00-06\DAD-
                  OD(1-2)-95-5-1ML-220NM-254NM-20MIN.M (Sequence Method)
Last changed    : 1/15/2016 10:43:43 PM by SYSTEM
                  (modified after loading)
Additional Info : Peak(s) manually integrated
=====
```

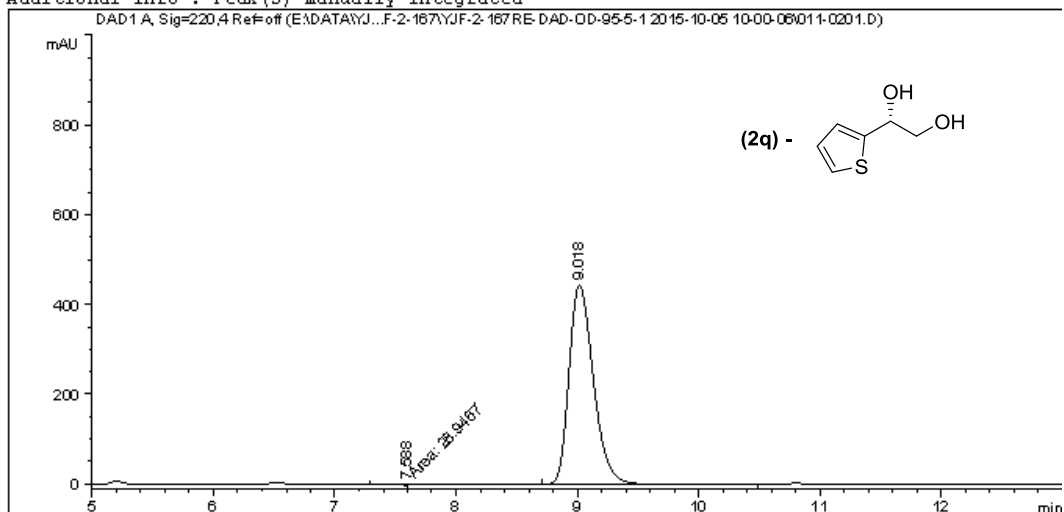

Area Percent Report

```
Sorted By      : Signal
Multiplier     : 1.0000
Dilution       : 1.0000
Do not use Multiplier & Dilution Factor with ISTDs
```

Signal 1: DAD1 A, Sig=220,4 Ref=off

| Peak # | RetTime [min] | Type | Width [min] | Area [mAU*s] | Height [mAU] | Area %  |
|--------|---------------|------|-------------|--------------|--------------|---------|
| 1      | 7.588         | MM   | 0.2018      | 28.94666     | 2.39117      | 0.4627  |
| 2      | 9.018         | VB   | 0.2177      | 6227.20752   | 443.84637    | 99.5373 |

Totals : 6256.15418 446.23755

\*\*\* End of Report \*\*\*

```
=====
Acq. Operator   : SYSTEM                      Seq. Line :    6
Acq. Instrument : 1260HPLC-DAD                Location  : Vial 81
Injection Date  : 12/2/2015 6:49:23 PM         Inj       :    1
                                           Inj Volume: 1.000 µl
Acq. Method     : E:\DATA\WVL\XY-20151202-17\XY-20151202-17 2015-12-02 15-57-33\DAD-0D(1-2
                  )-98-2-1.OML-205-250NM-50MIN.M
Last changed    : 12/2/2015 4:33:35 PM by SYSTEM
Analysis Method : E:\DATA\WVL\XY-20151202-17\XY-20151202-17 2015-12-02 15-57-33\DAD-0D(1-2
                  )-98-2-1.OML-205-250NM-50MIN.M (Sequence Method)
Last changed    : 12/30/2015 12:39:51 PM by SYSTEM
                  (modified after loading)
Additional Info : Peak(s) manually integrated
=====
```

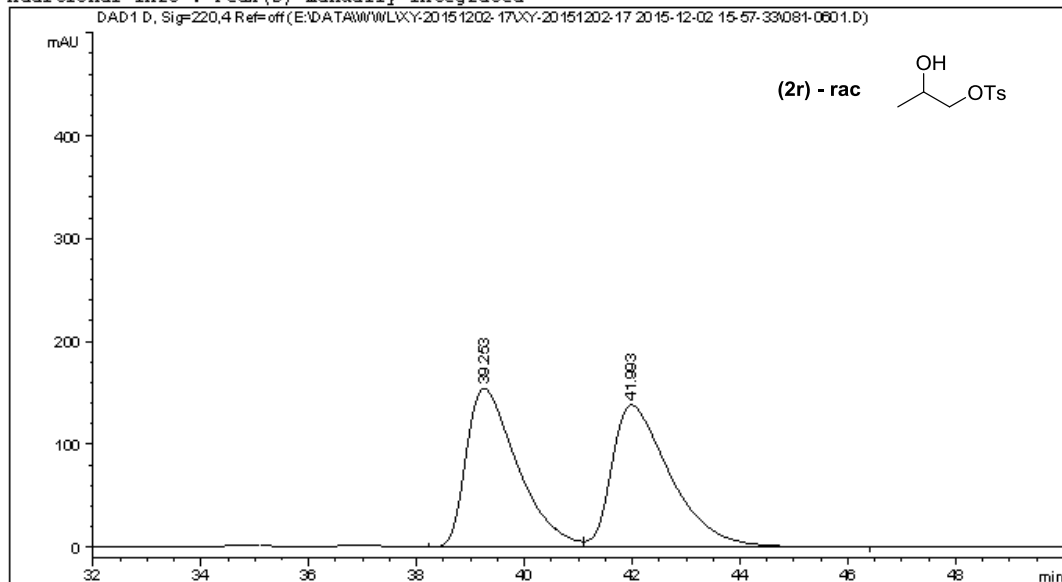

```
=====
                          Area Percent Report
=====
Sorted By      :      Signal
Multiplier     :      1.0000
Dilution       :      1.0000
Do not use Multiplier & Dilution Factor with ISTDs
```

Signal 1: DAD1 D, Sig=220,4 Ref=off

| Peak # | RetTime [min] | Type | Width [min] | Area [mAU*s] | Height [mAU] | Area %  |
|--------|---------------|------|-------------|--------------|--------------|---------|
| 1      | 39.253        | BV   | 0.9643      | 1.01686e4    | 154.40909    | 49.3577 |
| 2      | 41.993        | VB   | 1.0858      | 1.04333e4    | 138.03203    | 50.6423 |

Totals : 2.06019e4 292.44112

```
=====
*** End of Report ***
=====
```

```
=====
Acq. Operator   : SYSTEM                      Seq. Line :    2
Acq. Instrument : 1260HPLC-DAD                Location  : Vial 83
Injection Date  : 12/4/2015 9:20:51 PM        Inj       :    1
                                           Inj Volume: 1.000 µl
Acq. Method     : E:\DATA\WWL\WWL-2-199-GUANGHUO\WWL-2-199-GUANGHUO 2015-12-04 21-03-10
                  \DAD-OD(1-2)-98-2-1.OML-205-250NM-50MIN.M
Last changed    : 12/4/2015 9:03:11 PM by SYSTEM
Analysis Method : E:\DATA\WWL\WWL-2-199-GUANGHUO\WWL-2-199-GUANGHUO 2015-12-04 21-03-10
                  \DAD-OD(1-2)-98-2-1.OML-205-250NM-50MIN.M (Sequence Method)
Last changed    : 12/19/2015 2:58:09 PM by SYSTEM
                  (modified after loading)
Additional Info : Peak(s) manually integrated
=====
```

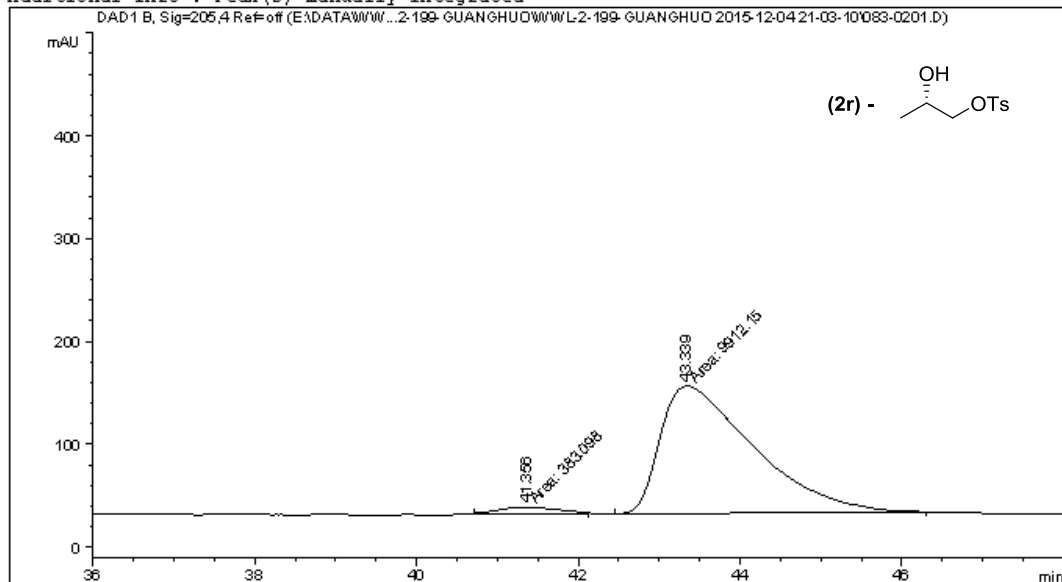

# Area Percent Report

```
Sorted By      : Signal
Multiplier     : 1.0000
Dilution       : 1.0000
Do not use Multiplier & Dilution Factor with ISTDs
```

Signal 1: DAD1 B, Sig=205,4 Ref=off

| Peak # | RetTime [min] | Type | Width [min] | Area [mAU*s] | Height [mAU] | Area %  |
|--------|---------------|------|-------------|--------------|--------------|---------|
| 1      | 41.356        | MM   | 0.9203      | 383.09811    | 6.93803      | 3.7211  |
| 2      | 43.339        | MM   | 1.3354      | 9912.14844   | 123.71206    | 96.2789 |

Totals : 1.02952e4 130.65009

\*\*\* End of Report \*\*\*

```
=====
Acq. Operator   : SYSTEM                      Seq. Line :    7
Acq. Instrument : 1260HPLC-DAD                Location  : Vial 82
Injection Date  : 12/2/2015 7:40:15 PM        Inj       :    1
                                           Inj Volume: 1.000 µl
Acq. Method     : E:\DATA\WWL\XY-20151202-17\XY-20151202-17 2015-12-02 15:57:33\DAD-0D(1-2
                  )-98-2-1.0ML-205-250NM-50MIN.M
Last changed    : 12/2/2015 4:33:35 PM by SYSTEM
Analysis Method : E:\DATA\WWL\XY-20151202-17\XY-20151202-17 2015-12-02 15:57:33\DAD-0D(1-2
                  )-98-2-1.0ML-205-250NM-50MIN.M (Sequence Method)
Last changed    : 1/21/2016 1:07:25 PM by SYSTEM
                  (modified after loading)
Additional Info : Peak(s) manually integrated
=====
```

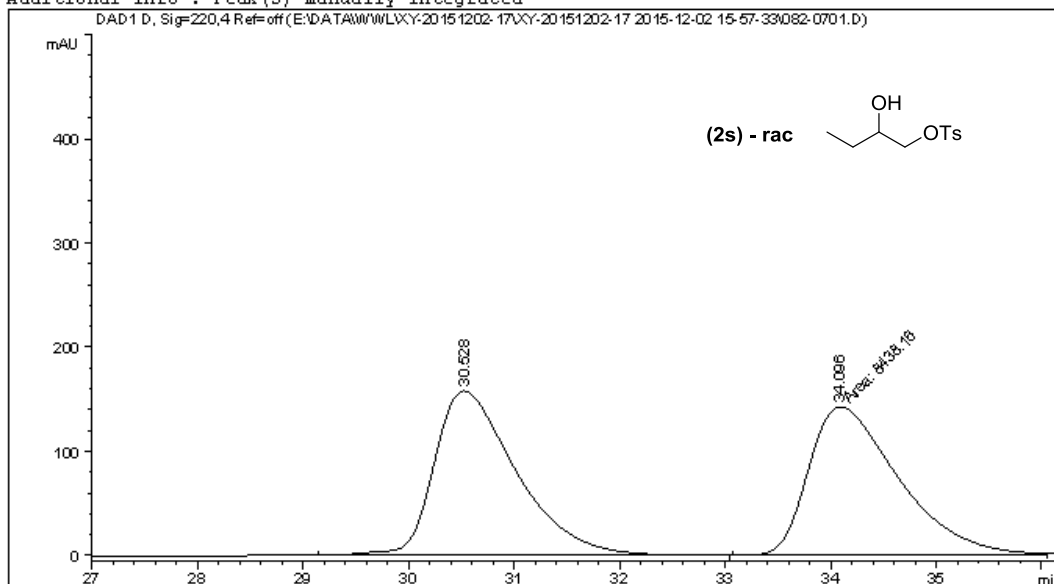

# Area Percent Report

```
Sorted By      :      Signal
Multiplier     :      1.0000
Dilution       :      1.0000
Do not use Multiplier & Dilution Factor with ISTDs
```

Signal 1: DAD1 D, Sig=220,4 Ref=off

| Peak # | RetTime [min] | Type | Width [min] | Area [mAU*s] | Height [mAU] | Area %  |
|--------|---------------|------|-------------|--------------|--------------|---------|
| 1      | 30.528        | BB   | 0.8075      | 8512.81738   | 157.75905    | 50.2202 |
| 2      | 34.096        | MM   | 0.9872      | 8438.16406   | 142.45729    | 49.7798 |

Totals : 1.69510e4 300.21634

\*\*\* End of Report \*\*\*

```
=====
Acq. Operator   : SYSTEM                      Seq. Line :    6
Acq. Instrument : 1260HPLC-DAD                Location  : Vial 5
Injection Date  : 11/14/2015 7:45:28 PM       Inj       :    1
                                           Inj Volume: 1.000 µl
Acq. Method     : E:\DATA\WVL\WVL-2-185\WVL-2-185 2015-11-14 16-04-27\
DAD-OD (1-2)-98-2-1.
                                           OML-205-250NM-50MIN.M
Last changed    : 11/14/2015 4:04:27 PM by SYSTEM
Analysis Method : E:\DATA\WVL\WVL-2-185\WVL-2-185 2015-11-14 16-04-27\
DAD-OD (1-2)-98-2-1.
                                           OML-205-250NM-50MIN.M (Sequence Method)
Last changed    : 1/17/2016 6:23:31 PM by SYSTEM
                                           (modified after loading)
Additional Info : Peak(s) manually integrated
=====
```

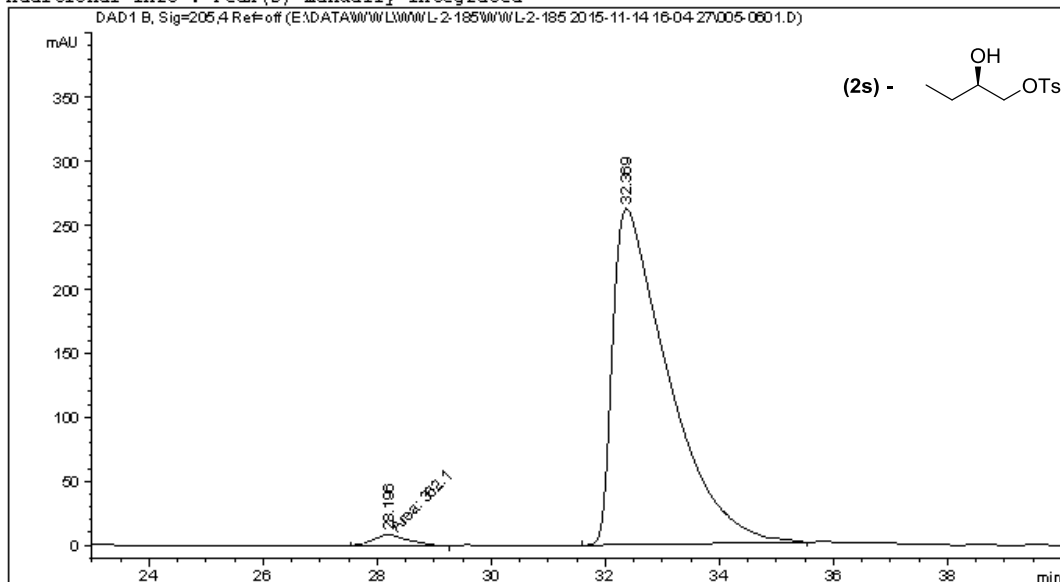

Area Percent Report

```
Sorted By      : Signal
Multiplier     : 1.0000
Dilution       : 1.0000
Do not use Multiplier & Dilution Factor with ISTDs
```

Signal 1: DAD1 B, Sig=205,4 Ref=off

| Peak # | RetTime [min] | Type | Width [min] | Area [mAU*s] | Height [mAU] | Area %  |
|--------|---------------|------|-------------|--------------|--------------|---------|
| 1      | 28.196        | MM   | 0.7101      | 362.09982    | 8.49826      | 1.9979  |
| 2      | 32.369        | BB   | 0.9328      | 1.77618e4    | 262.70511    | 98.0021 |

Totals : 1.81239e4 271.20337

\*\*\* End of Report \*\*\*

## IV. NMR spectra

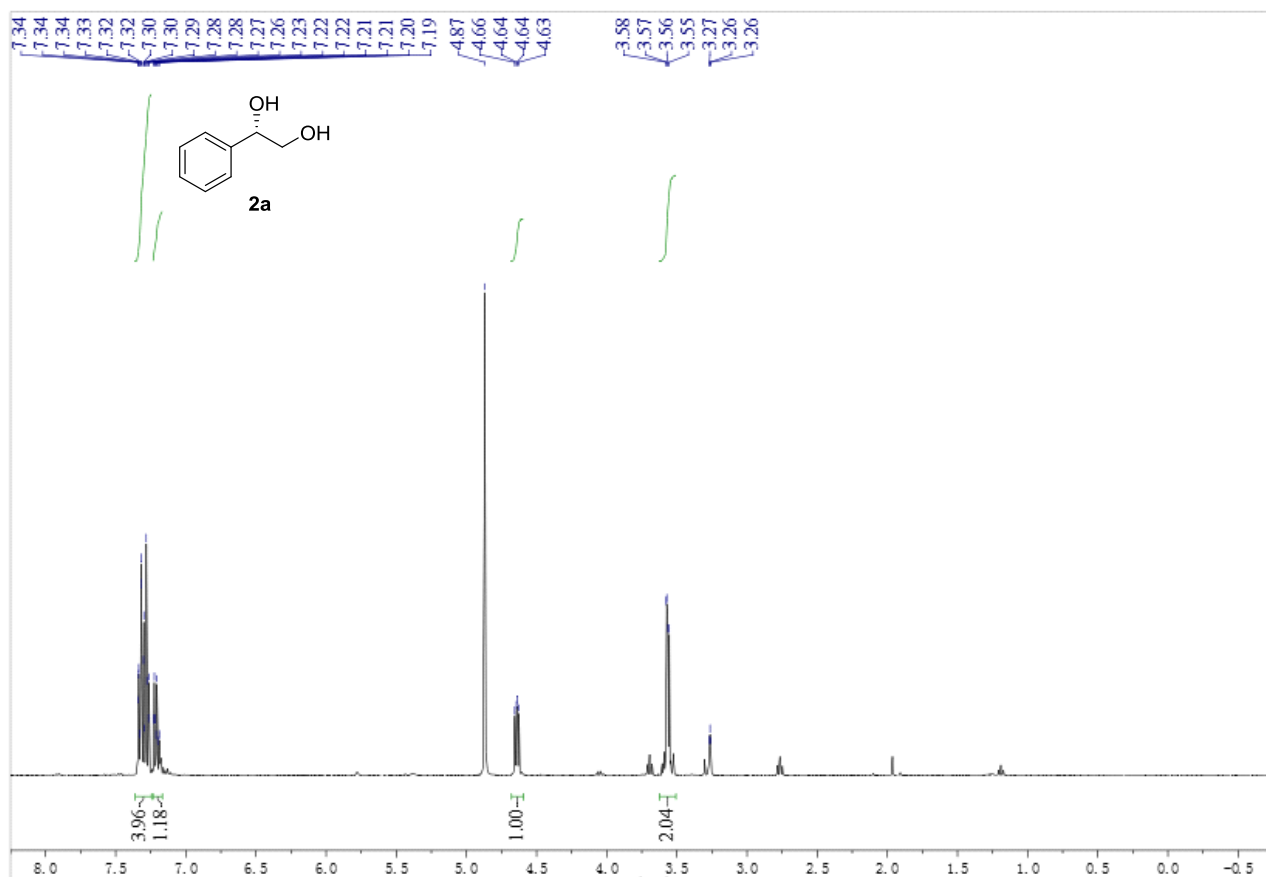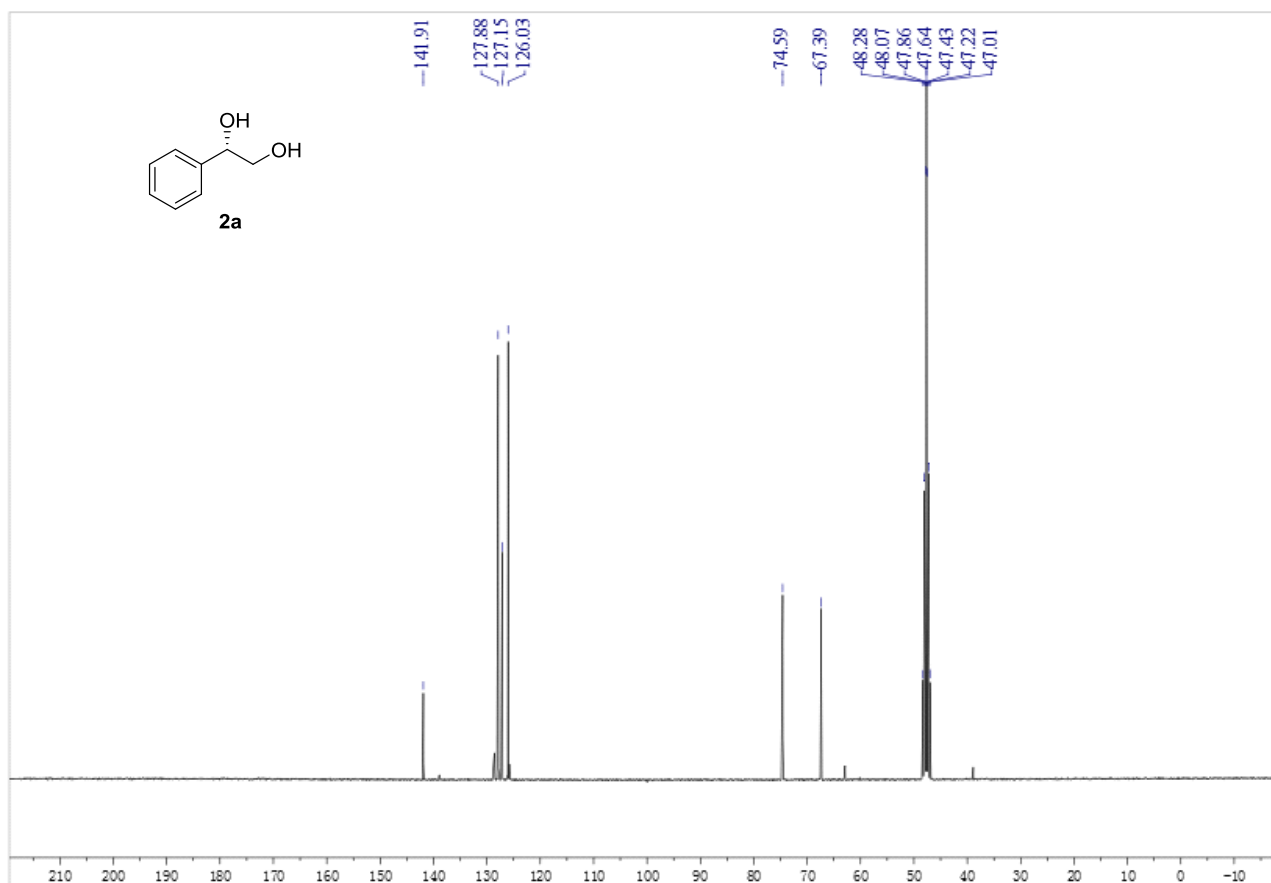

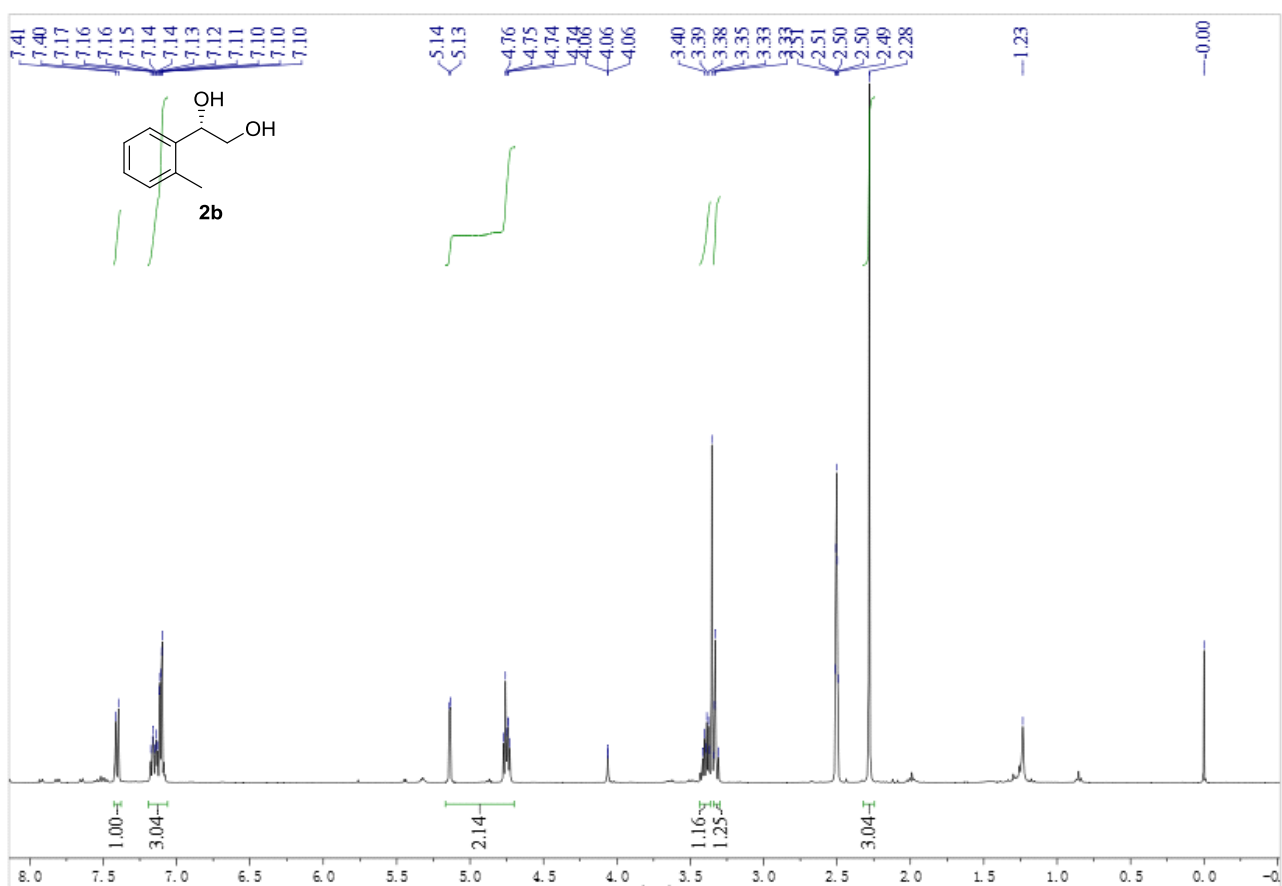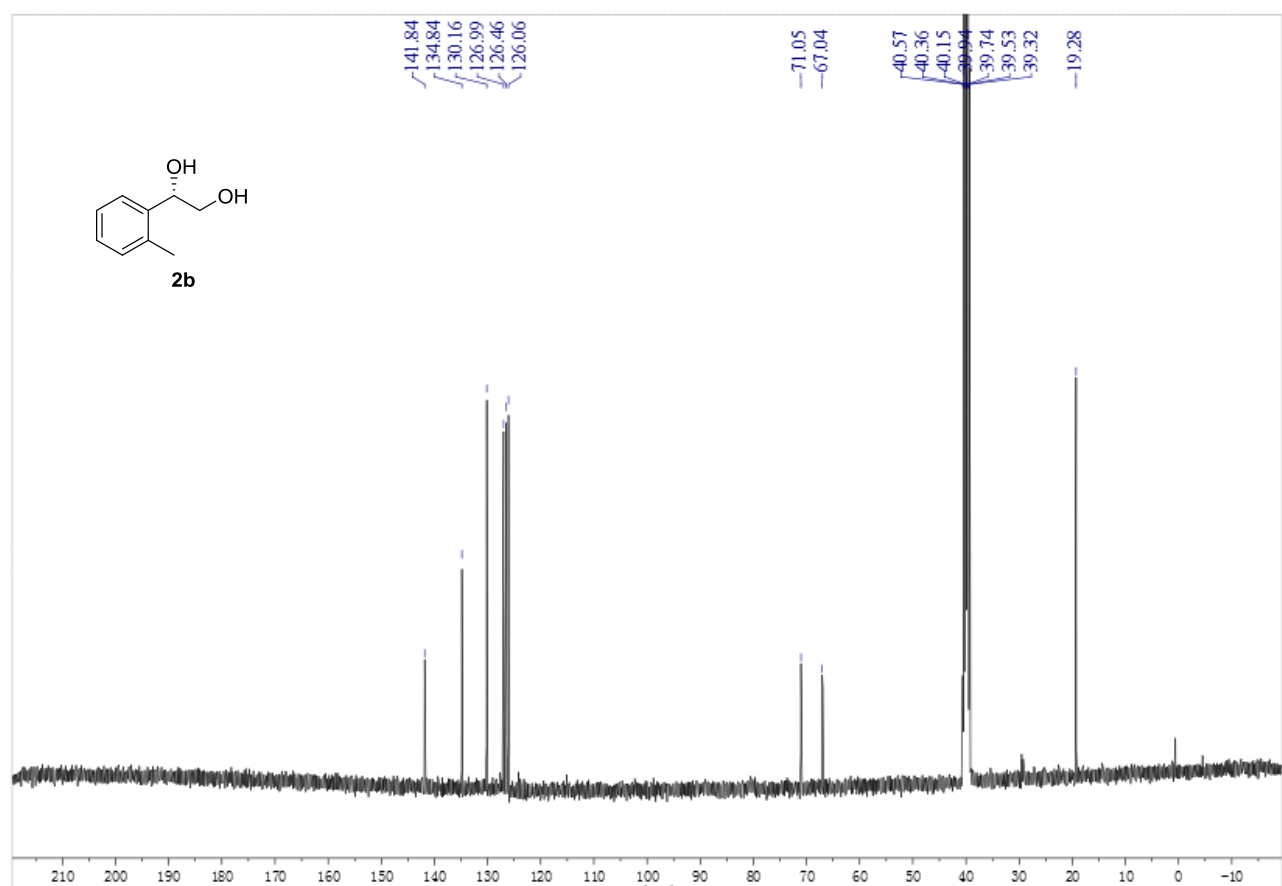



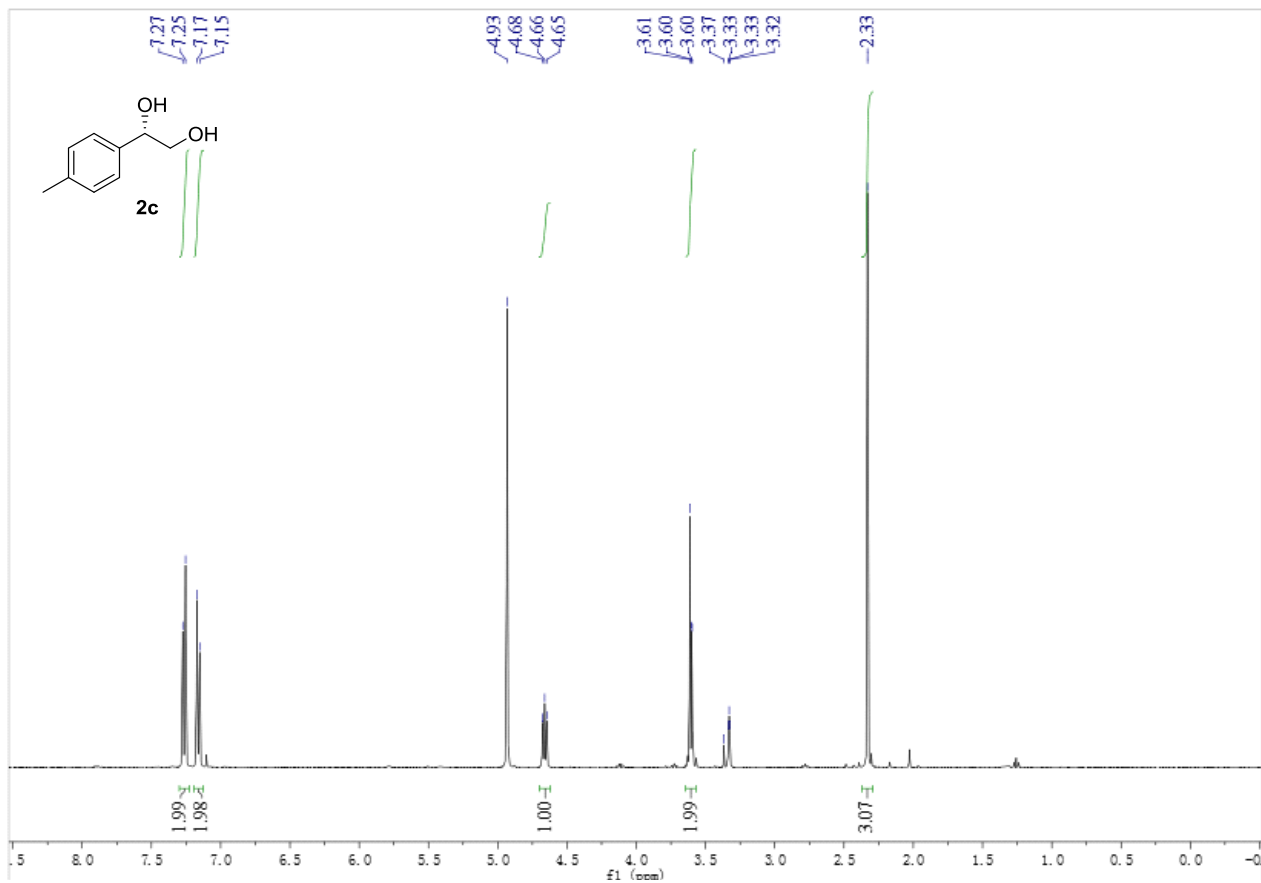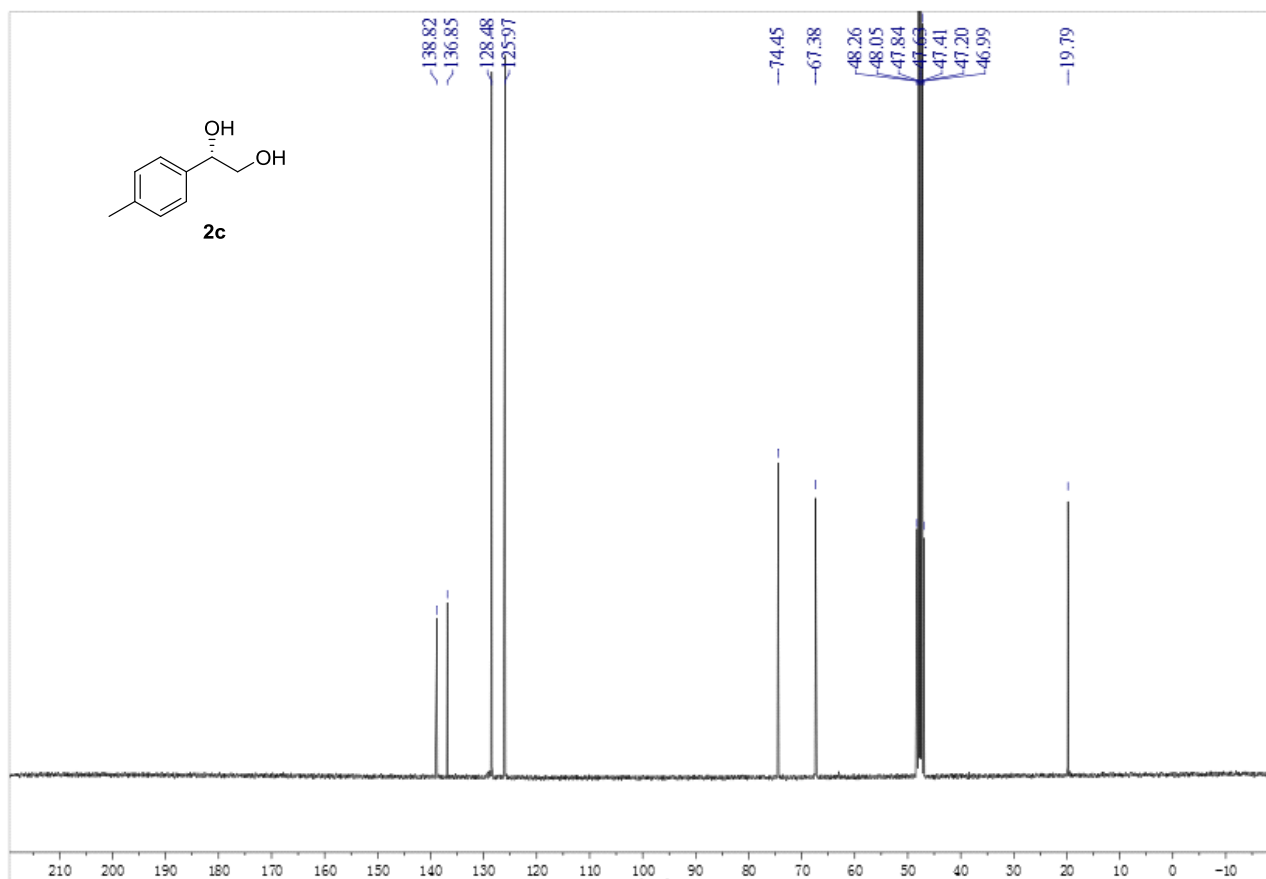

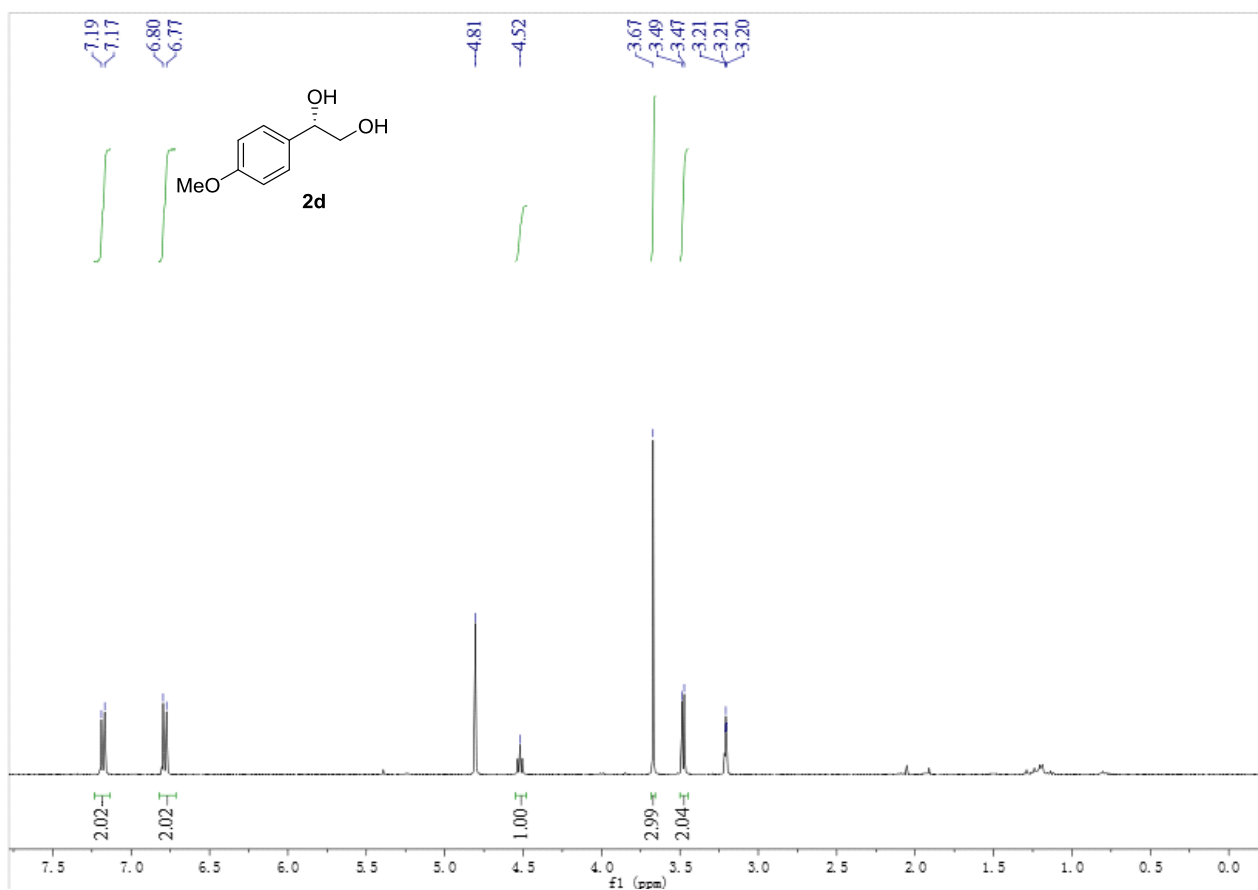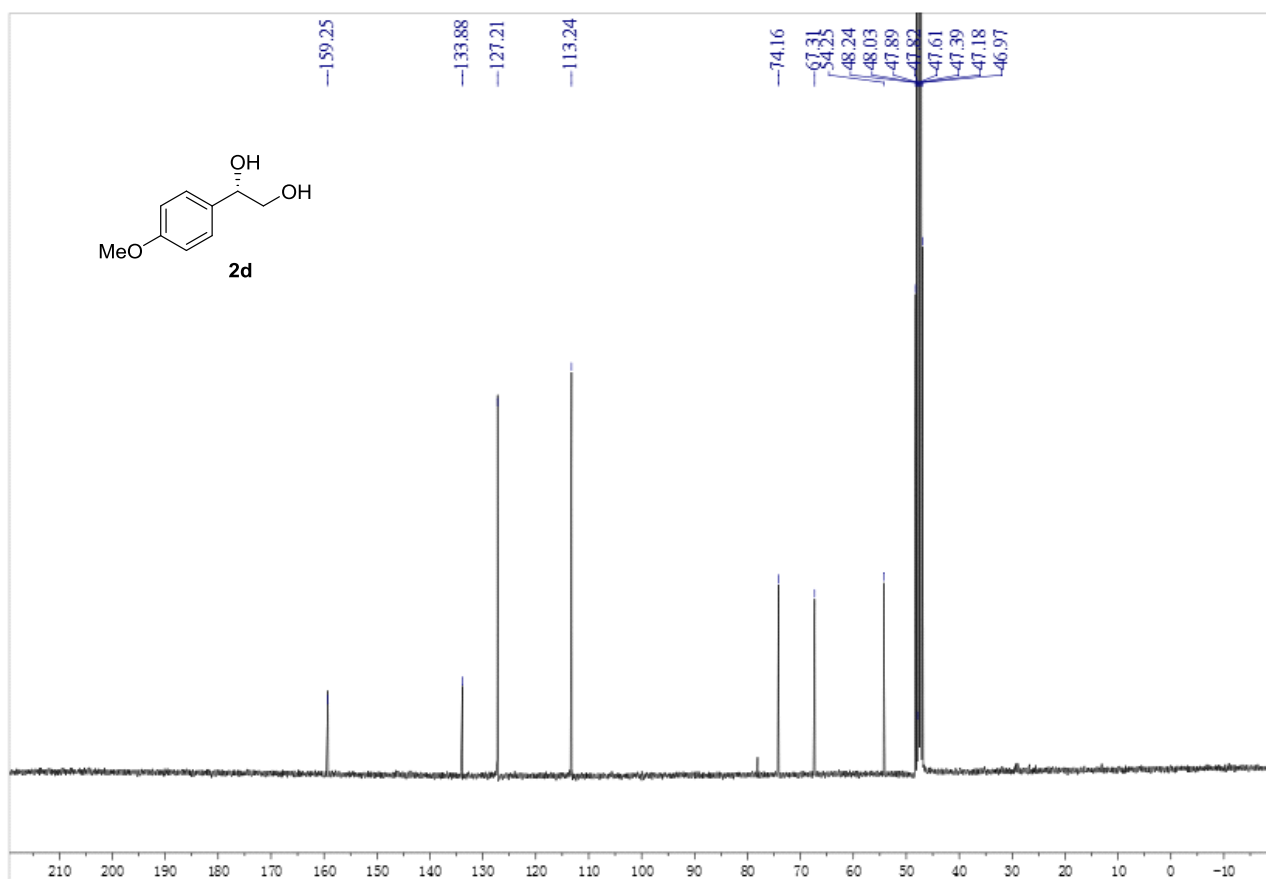

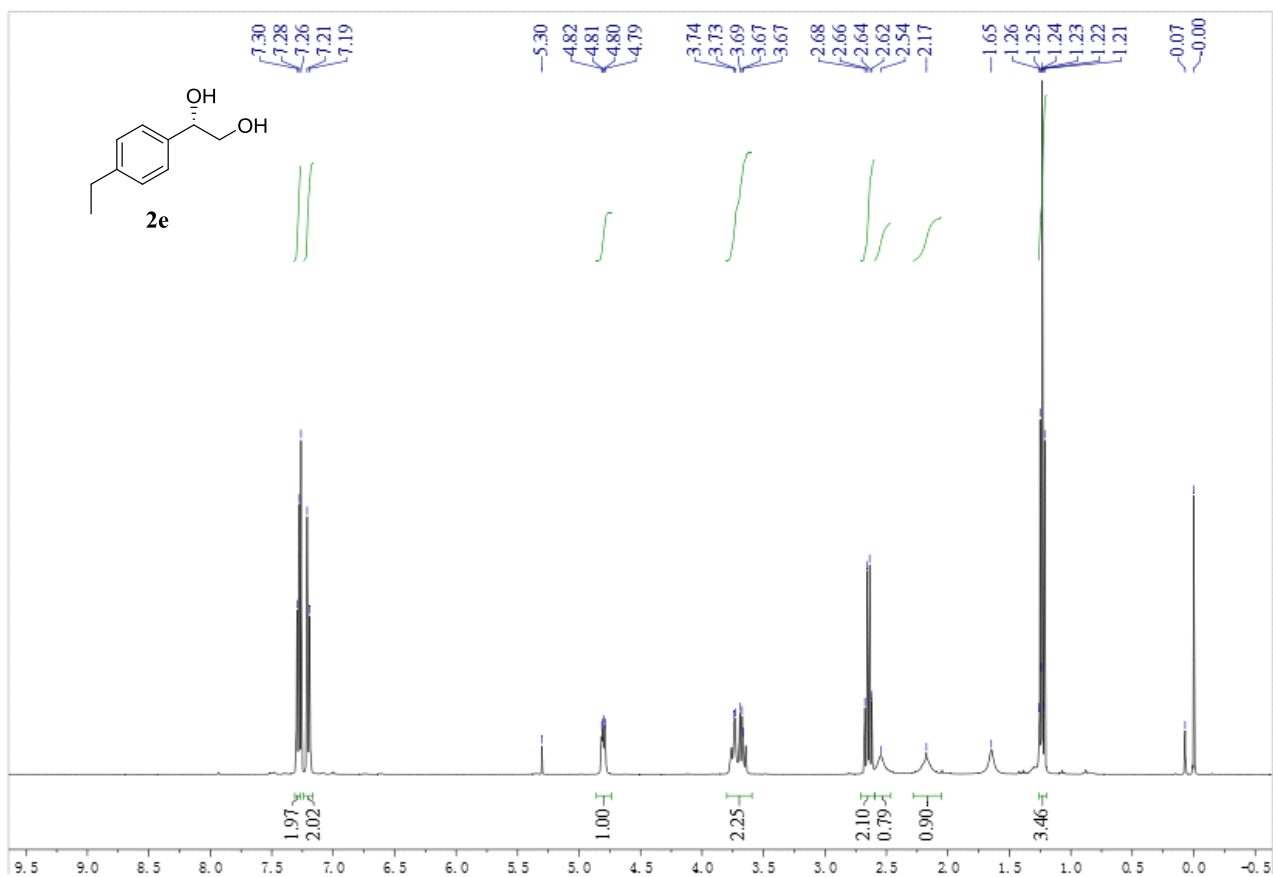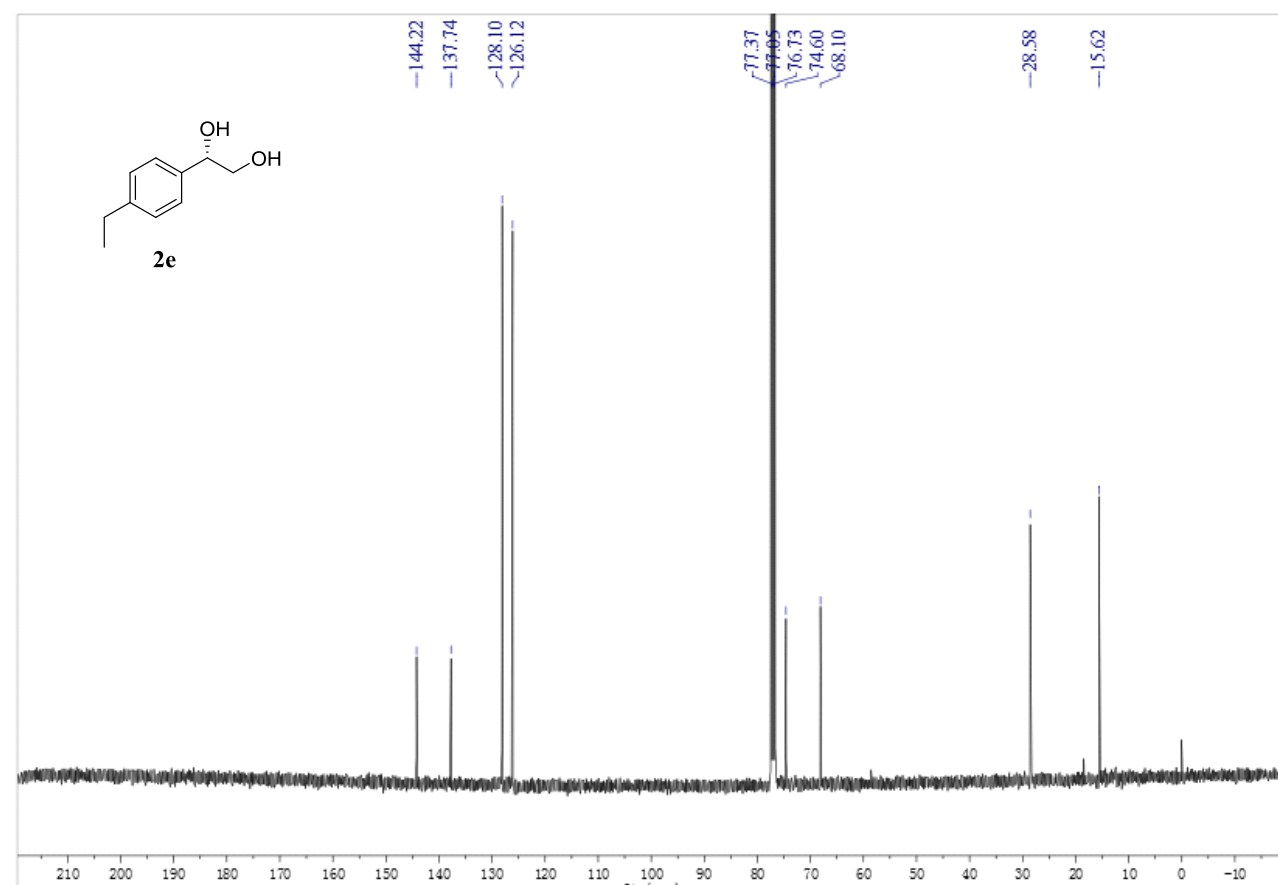

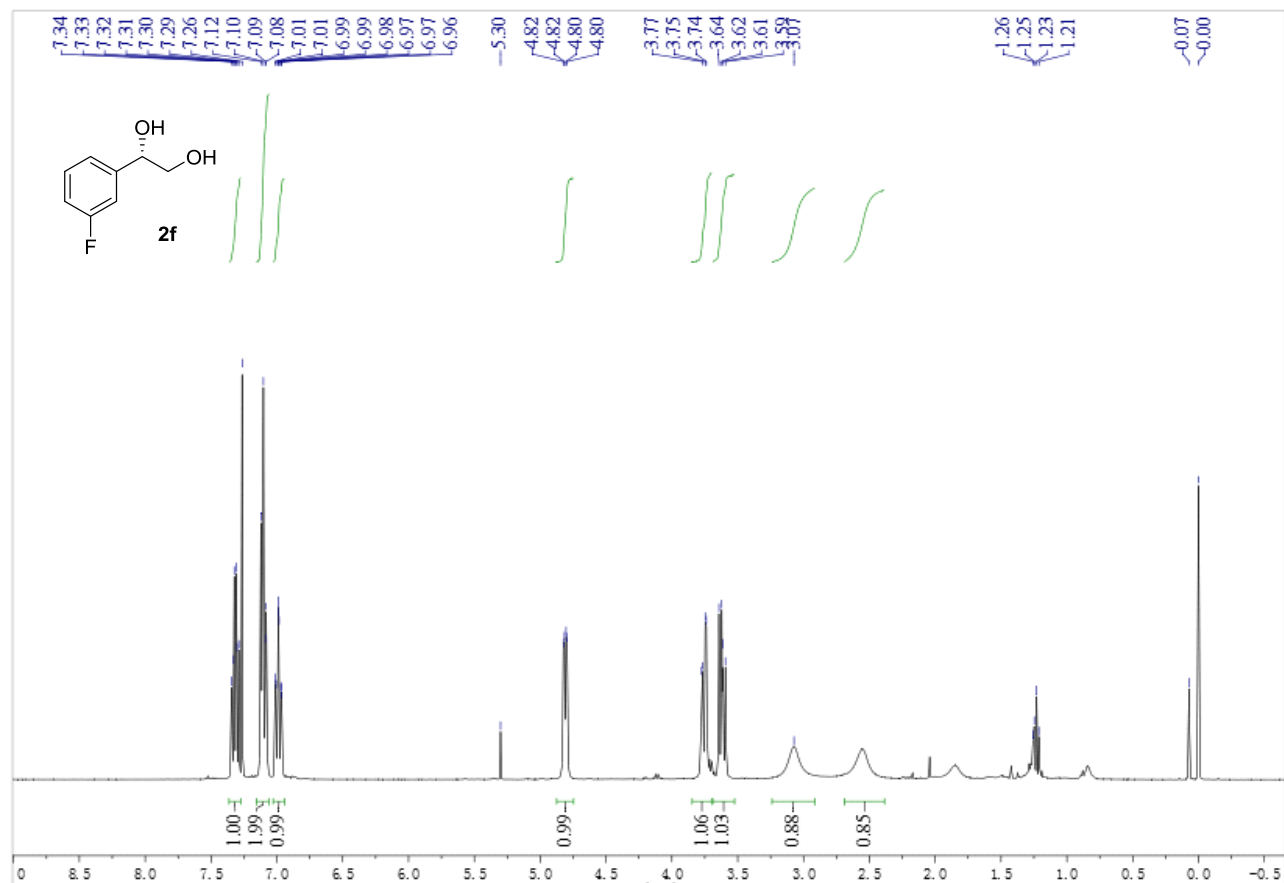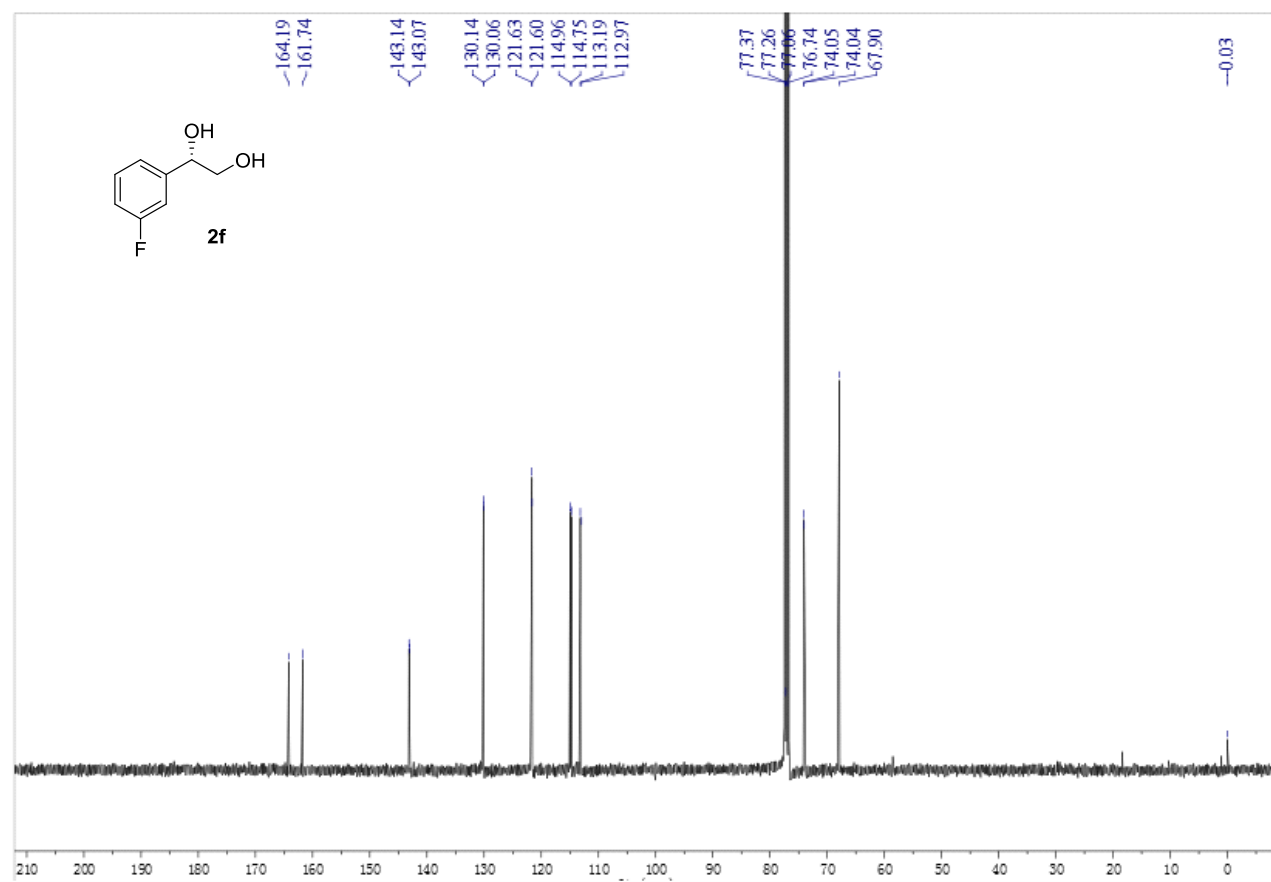

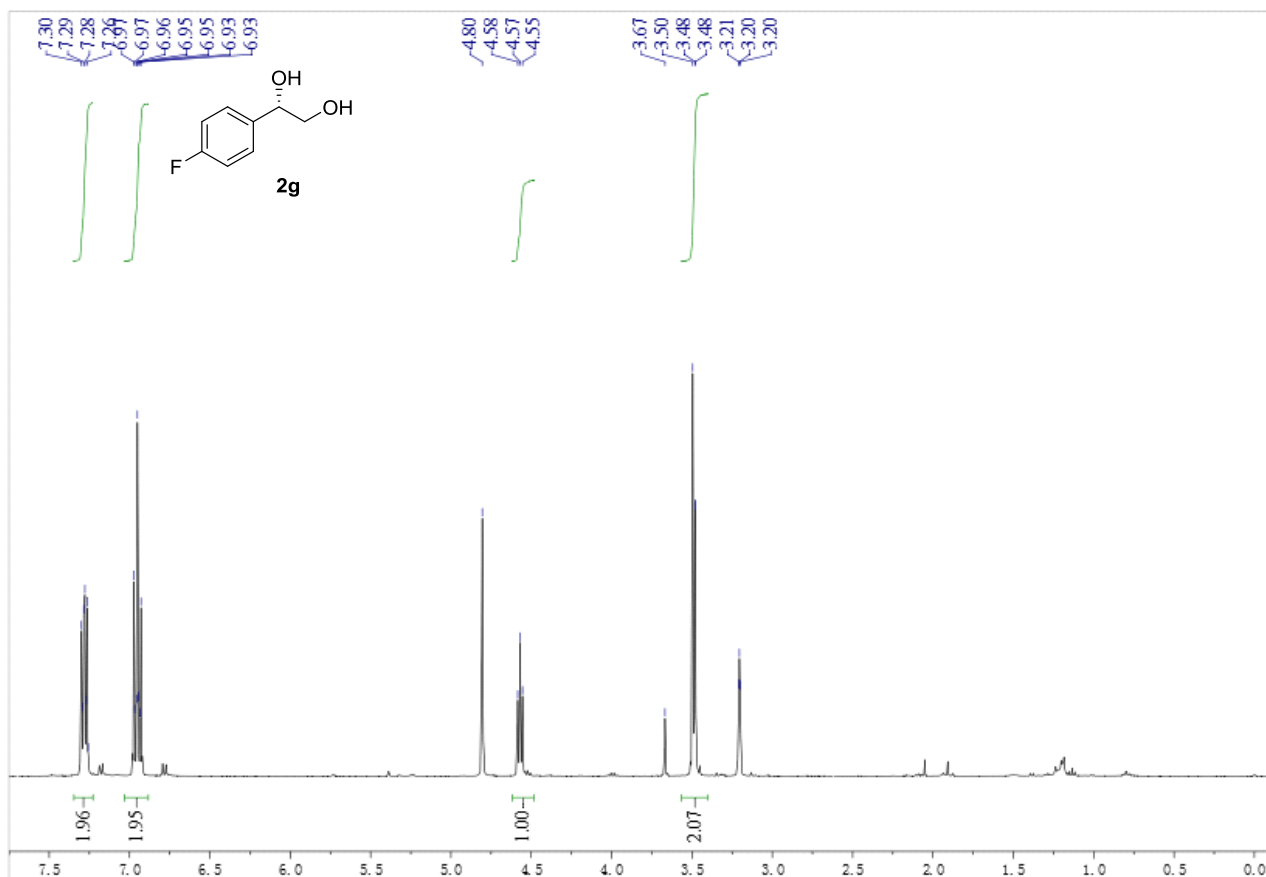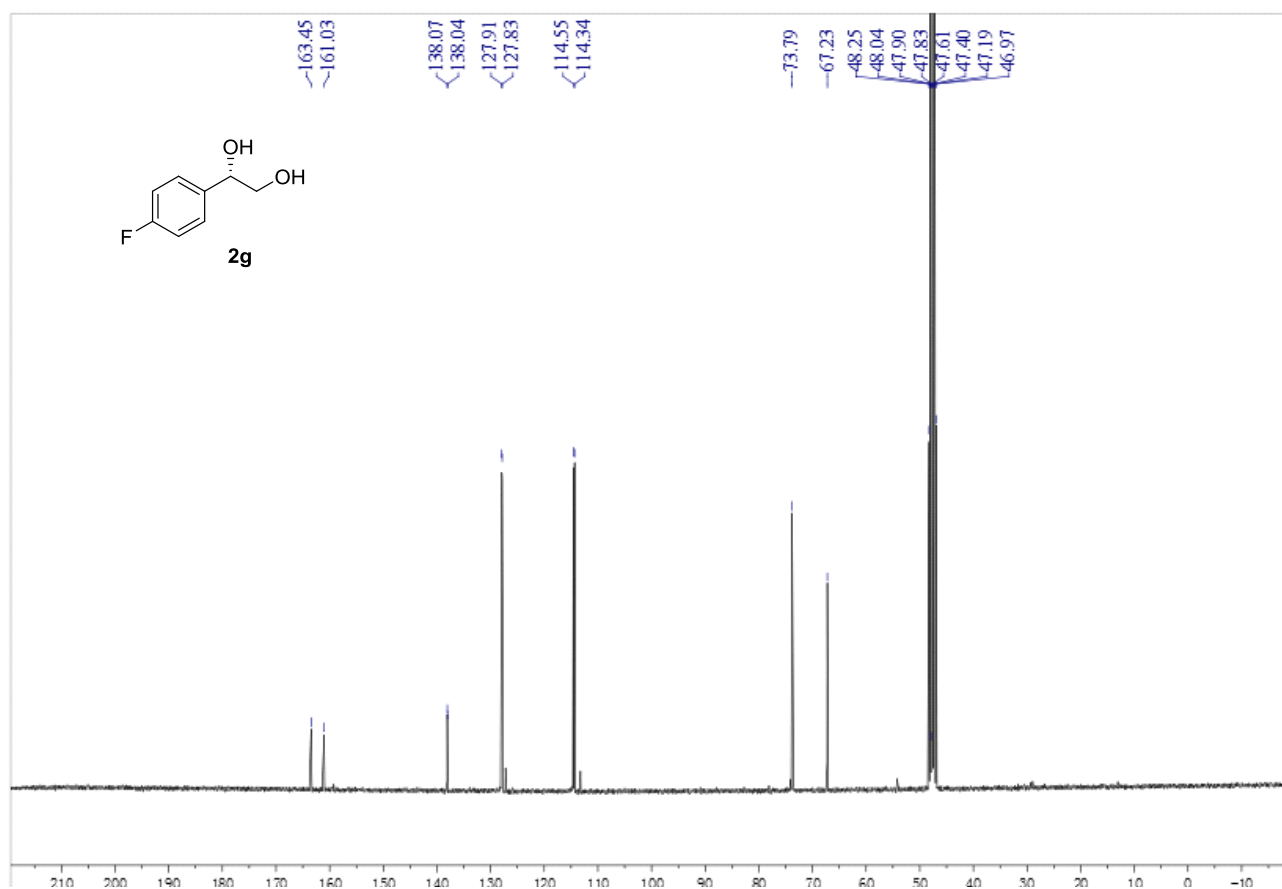

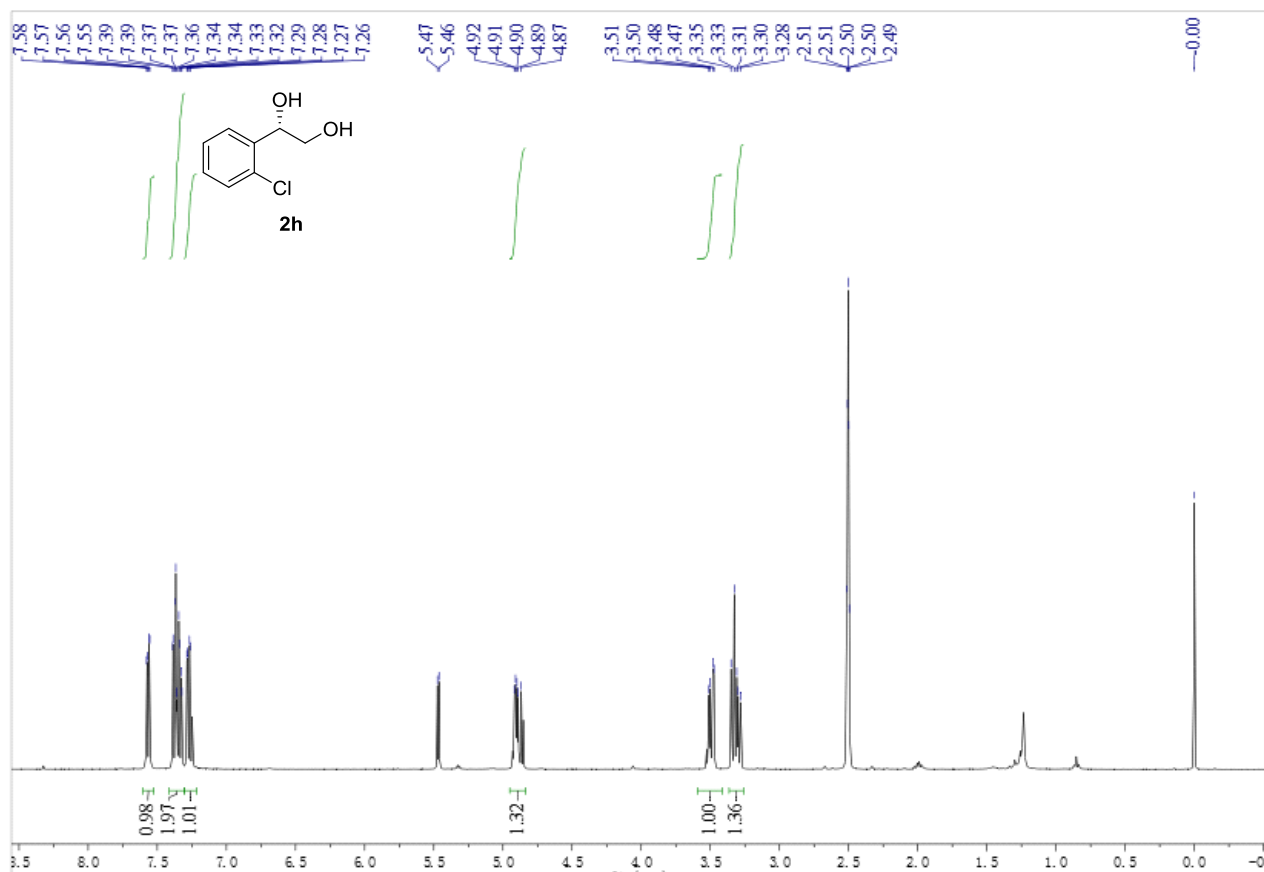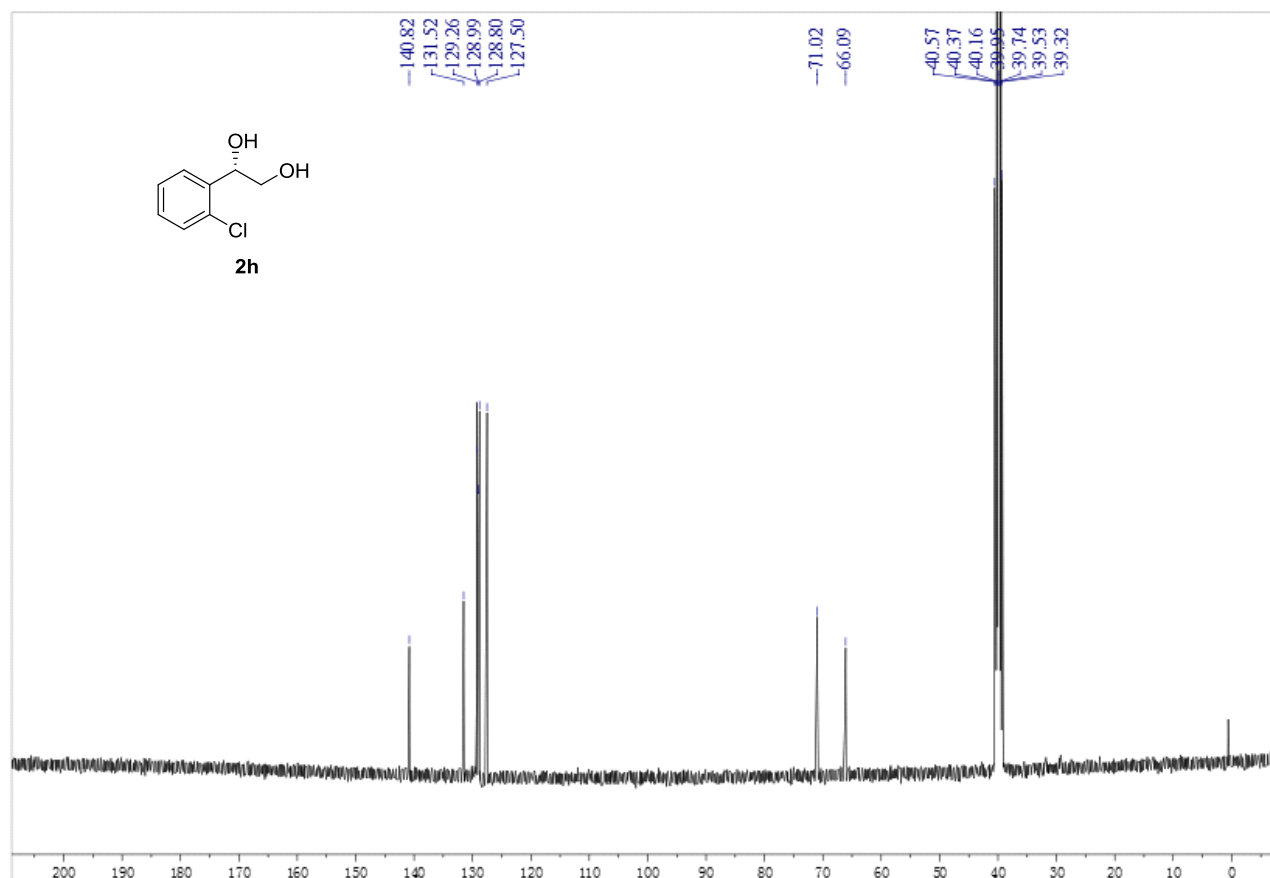

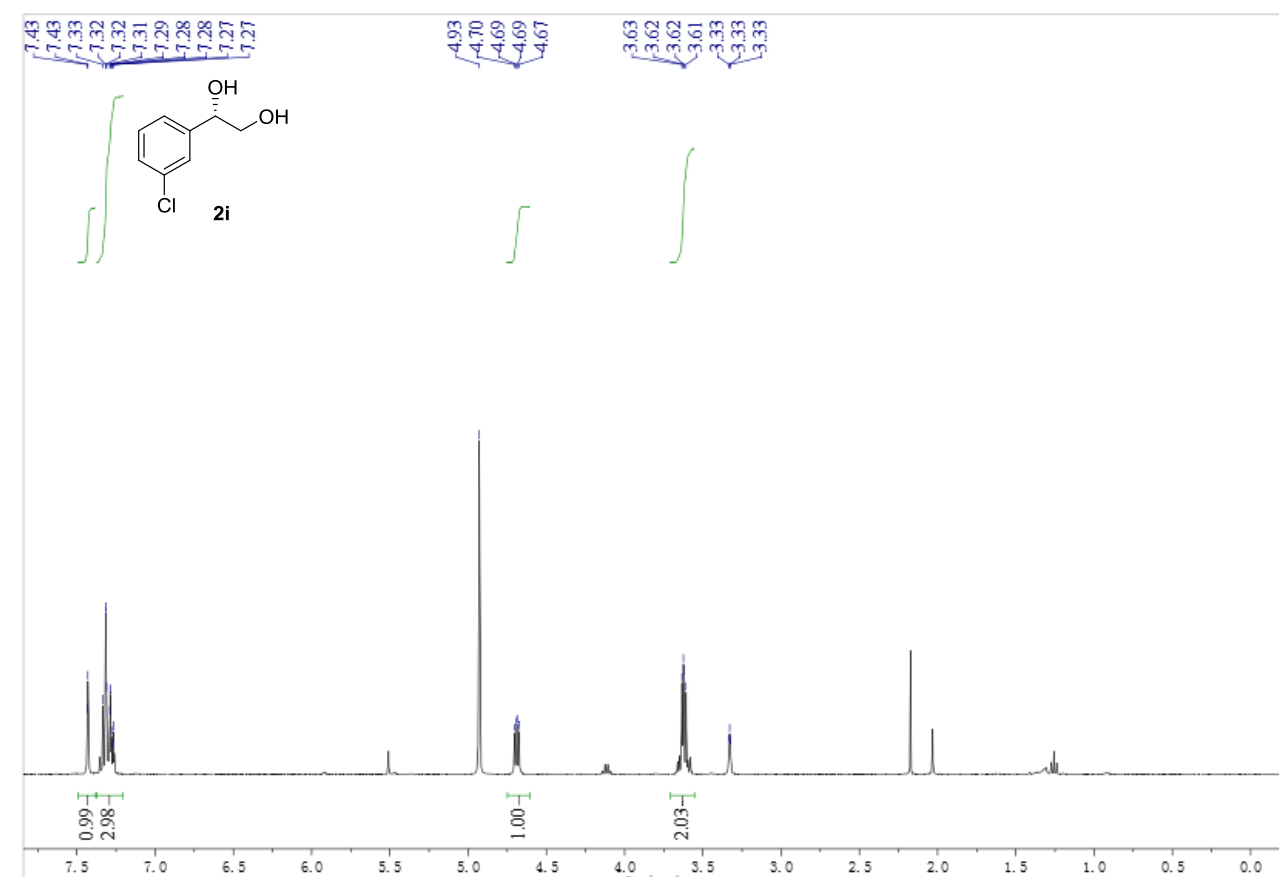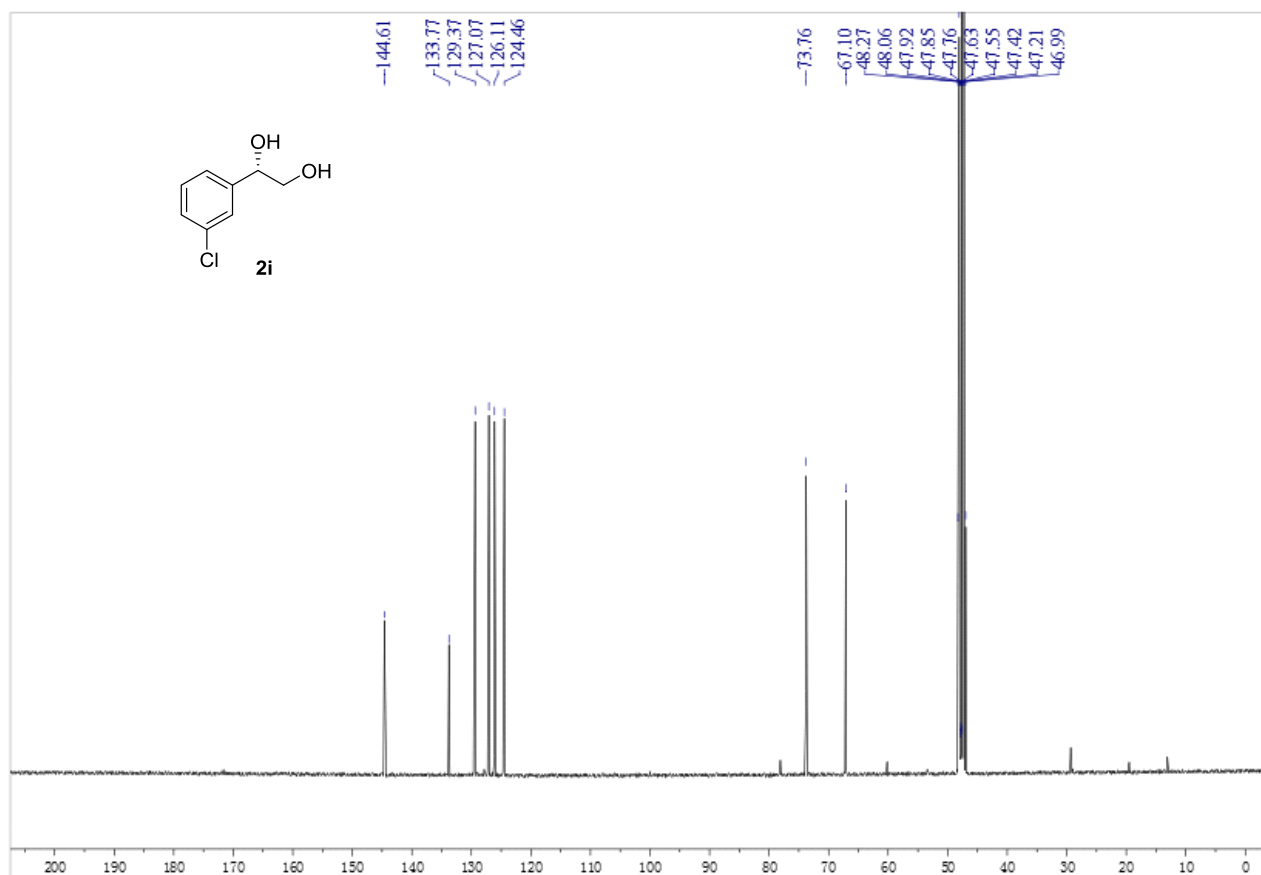

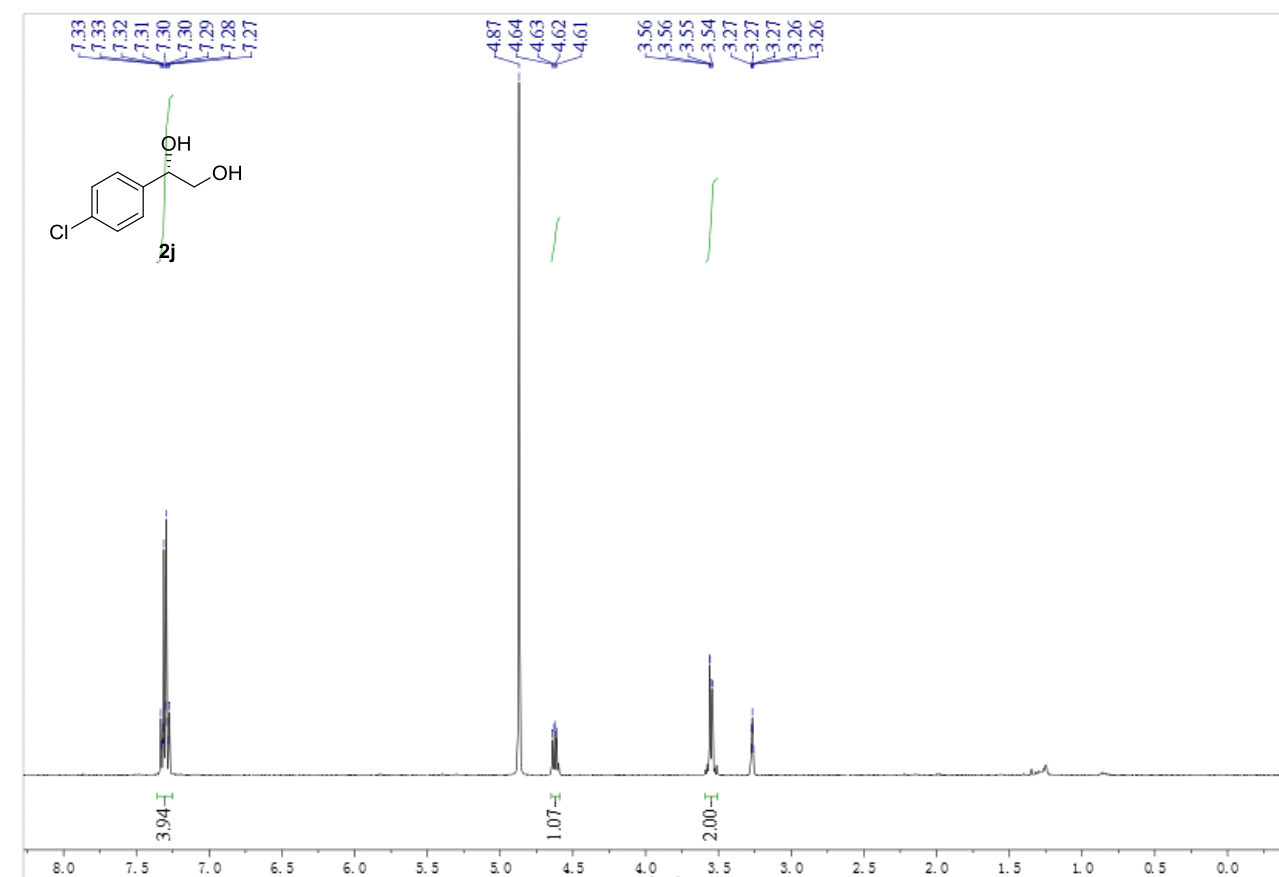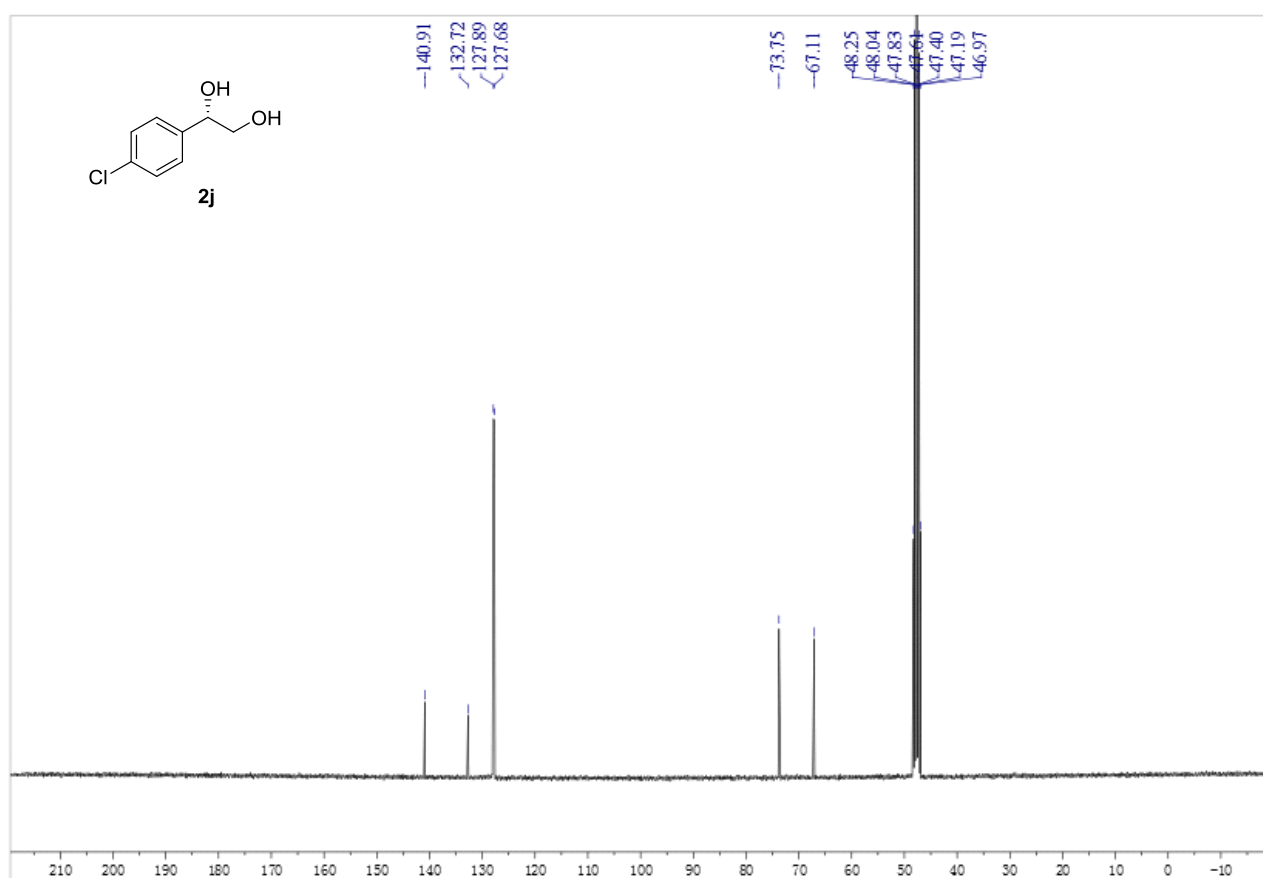



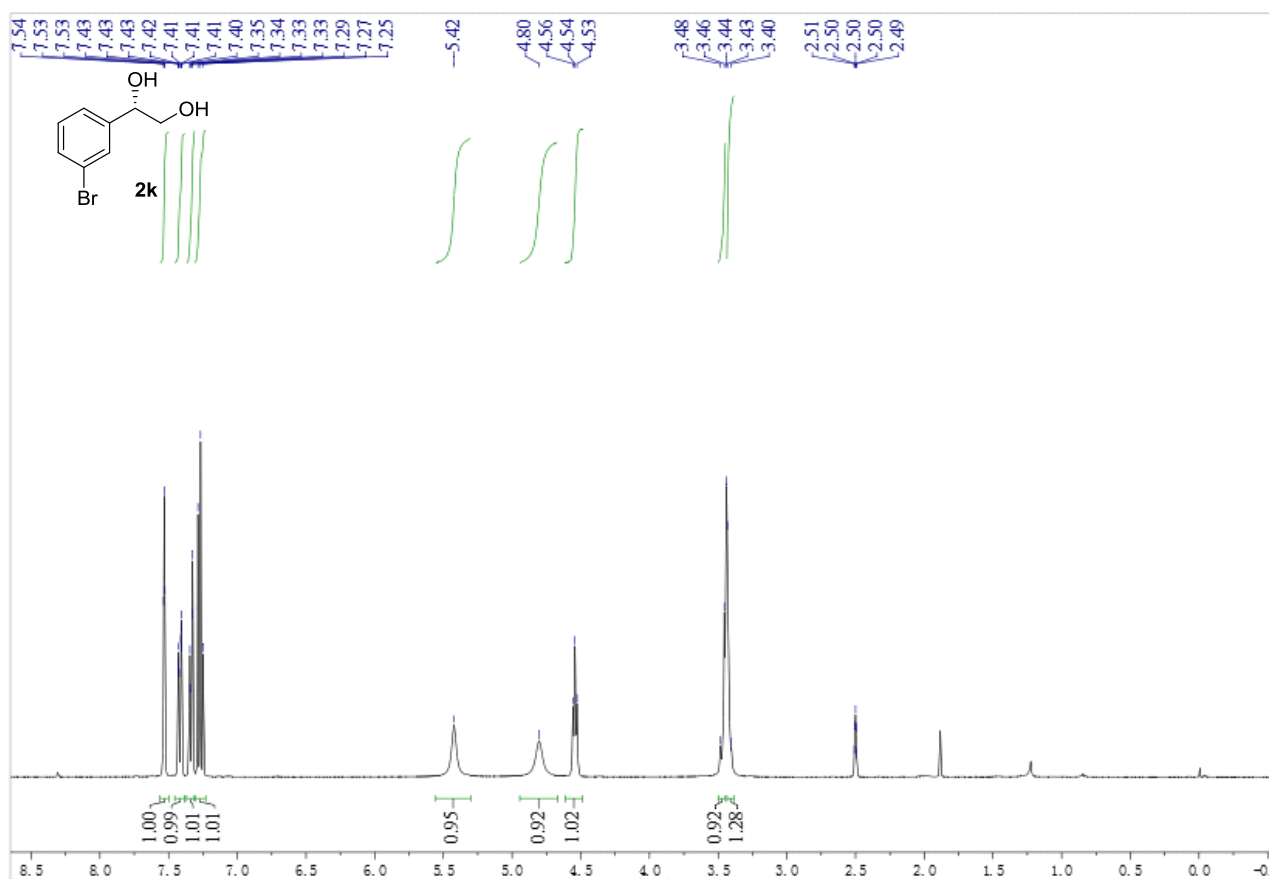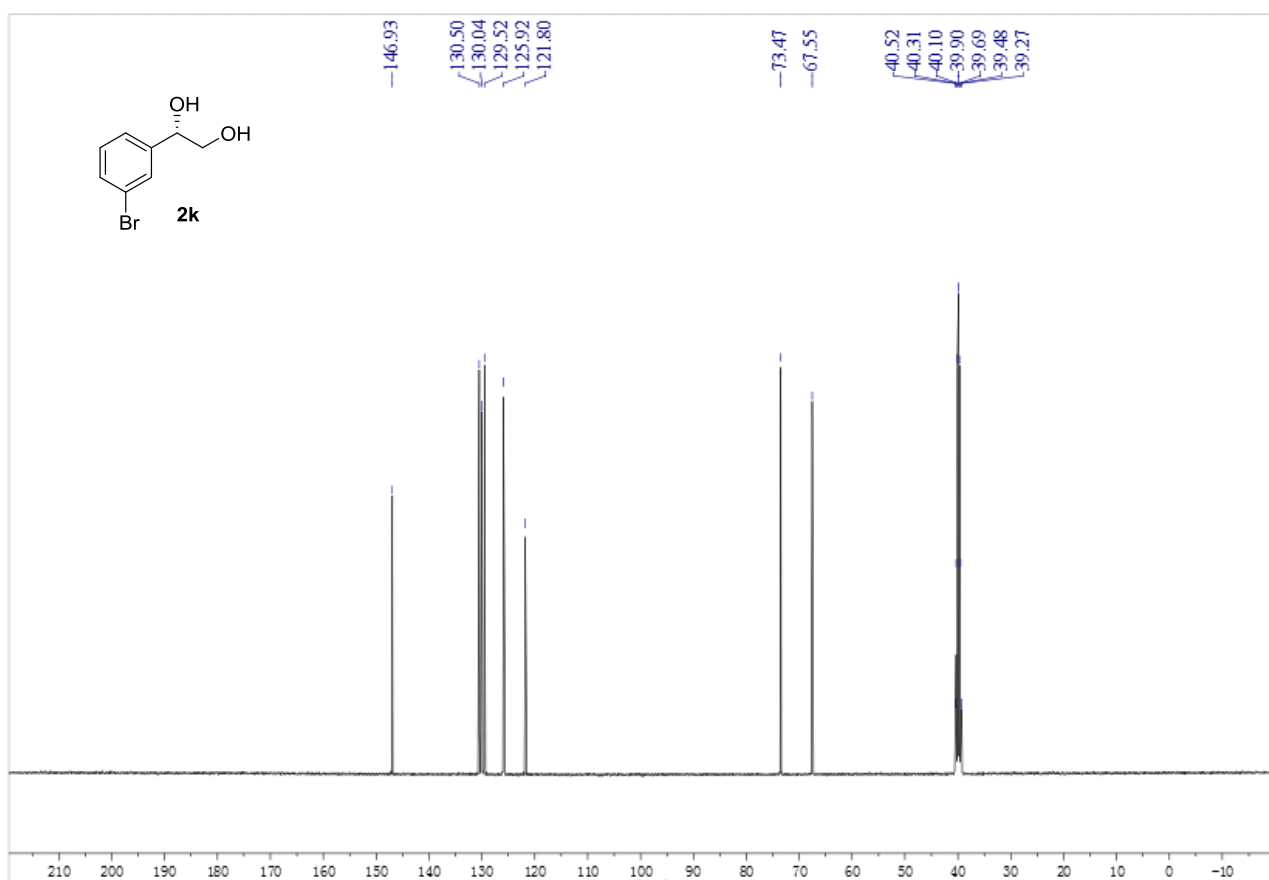

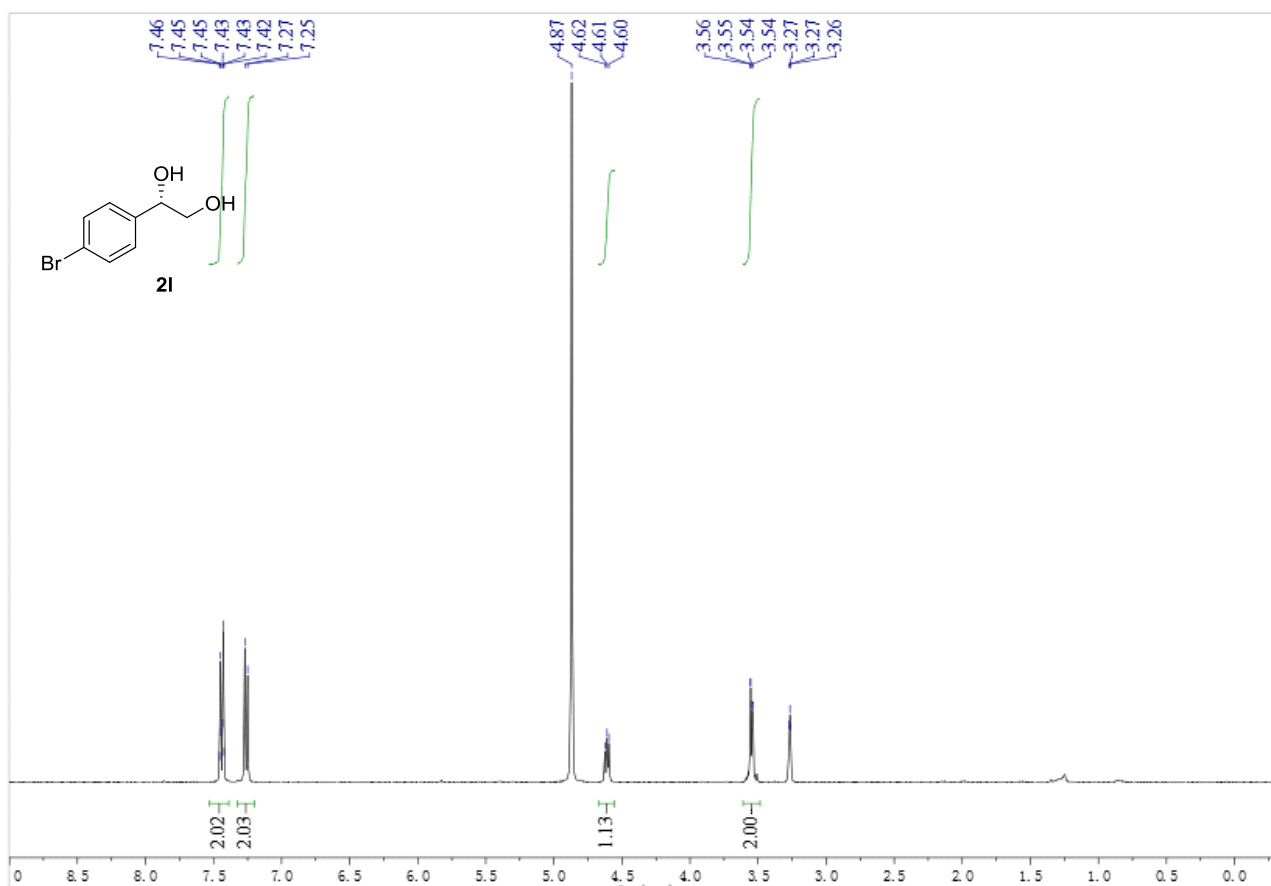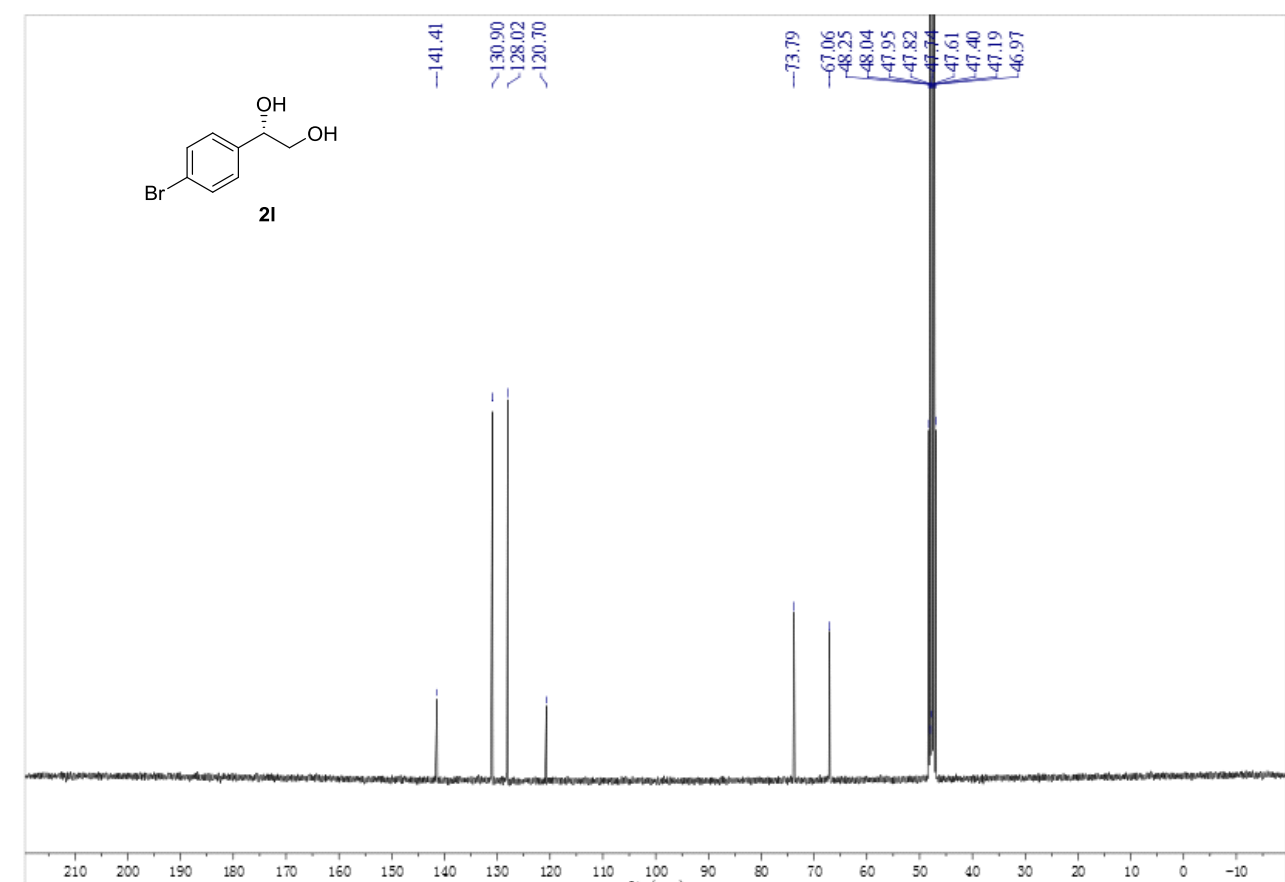

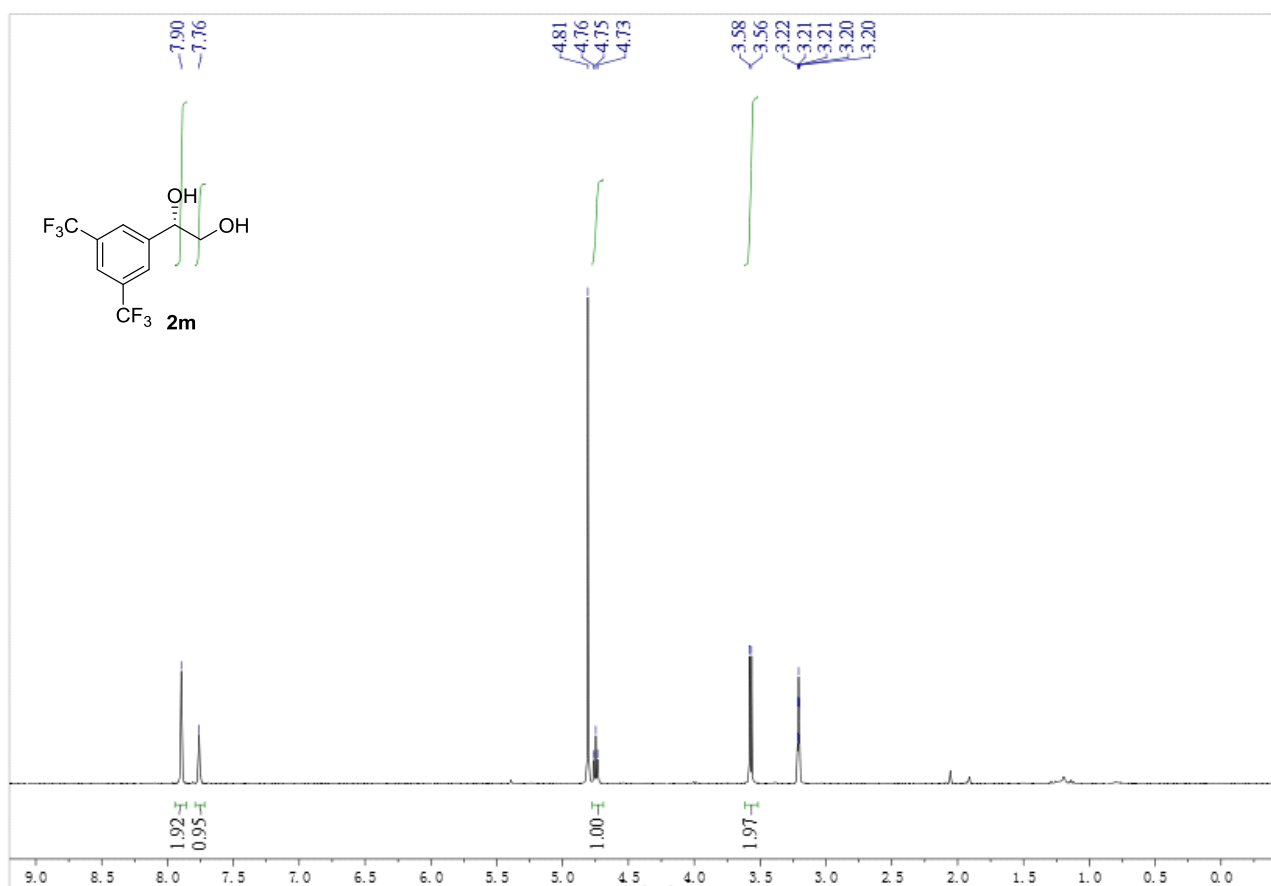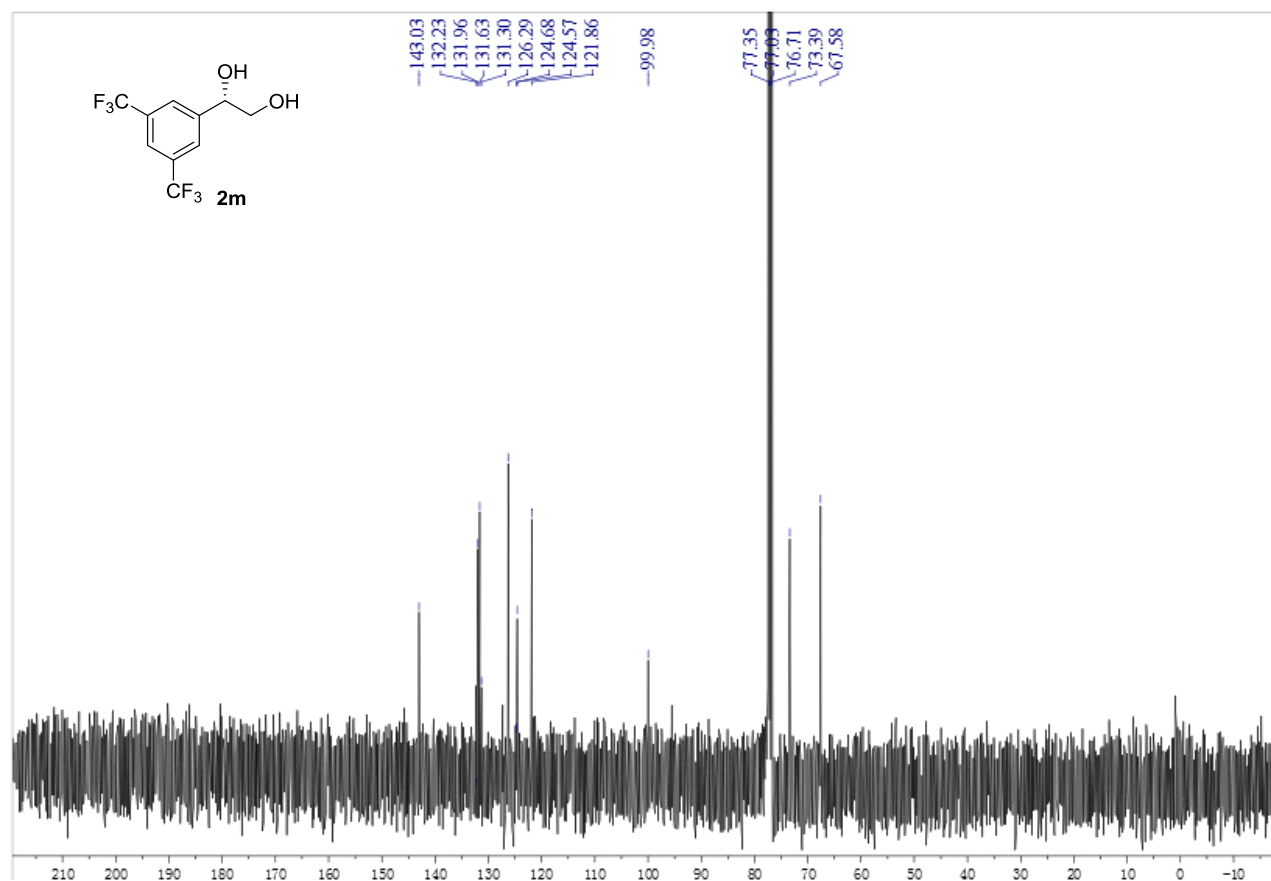

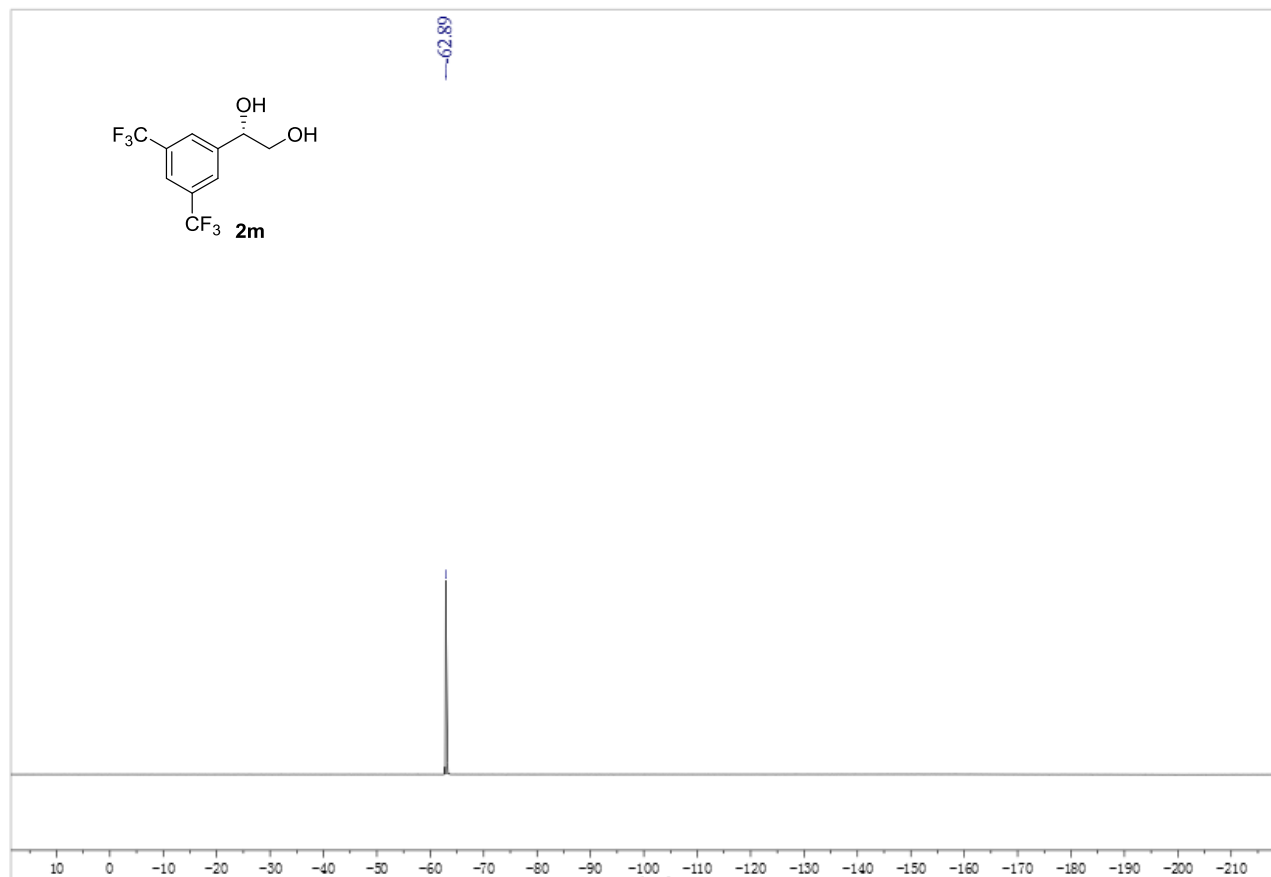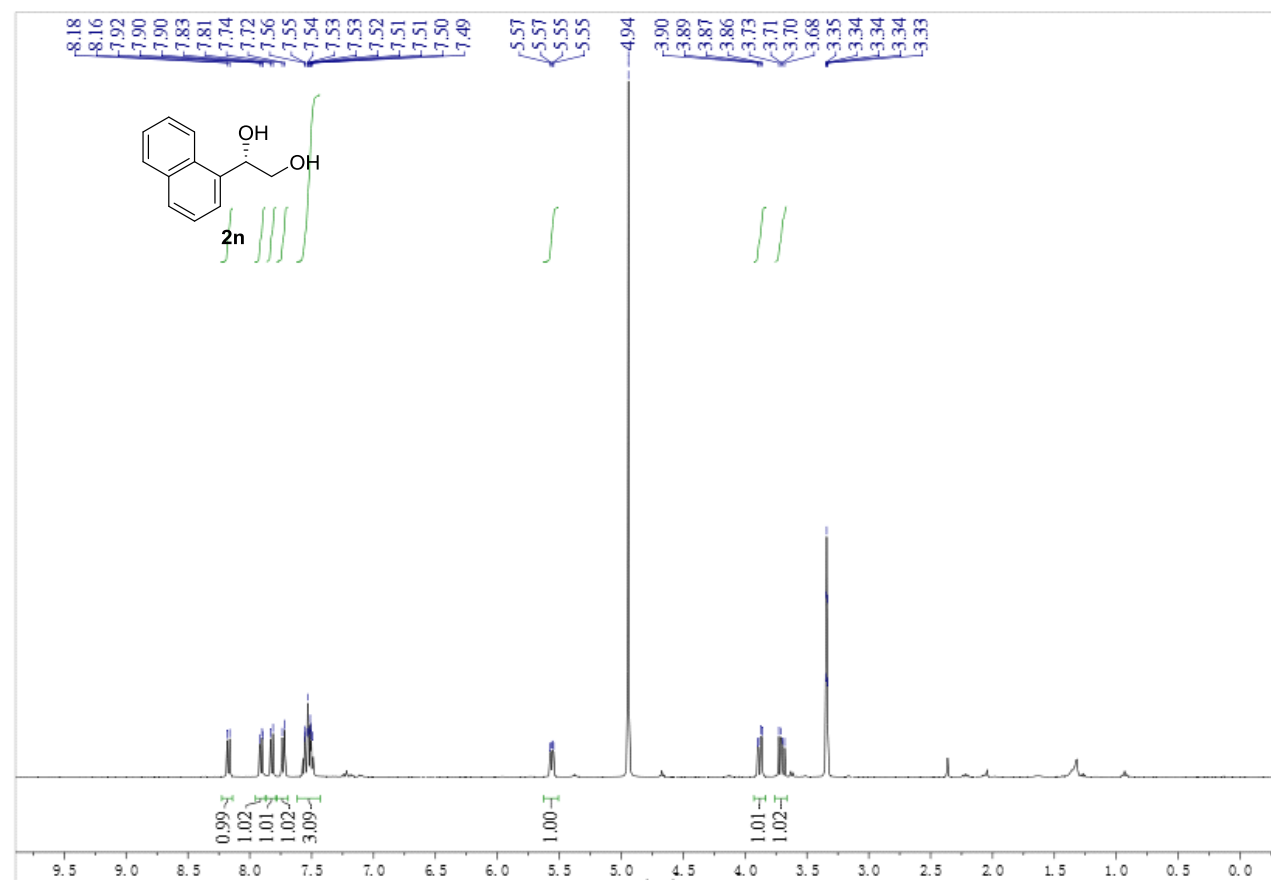

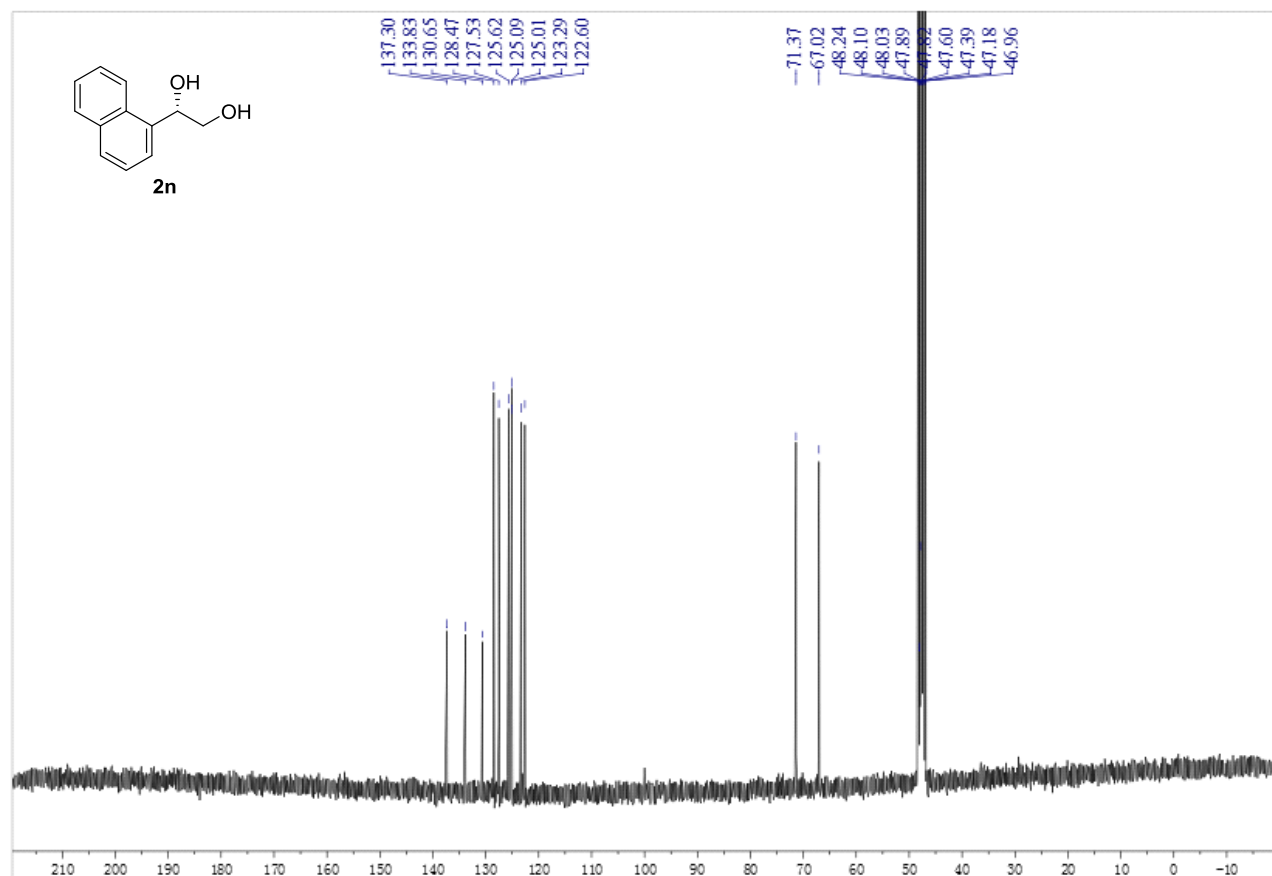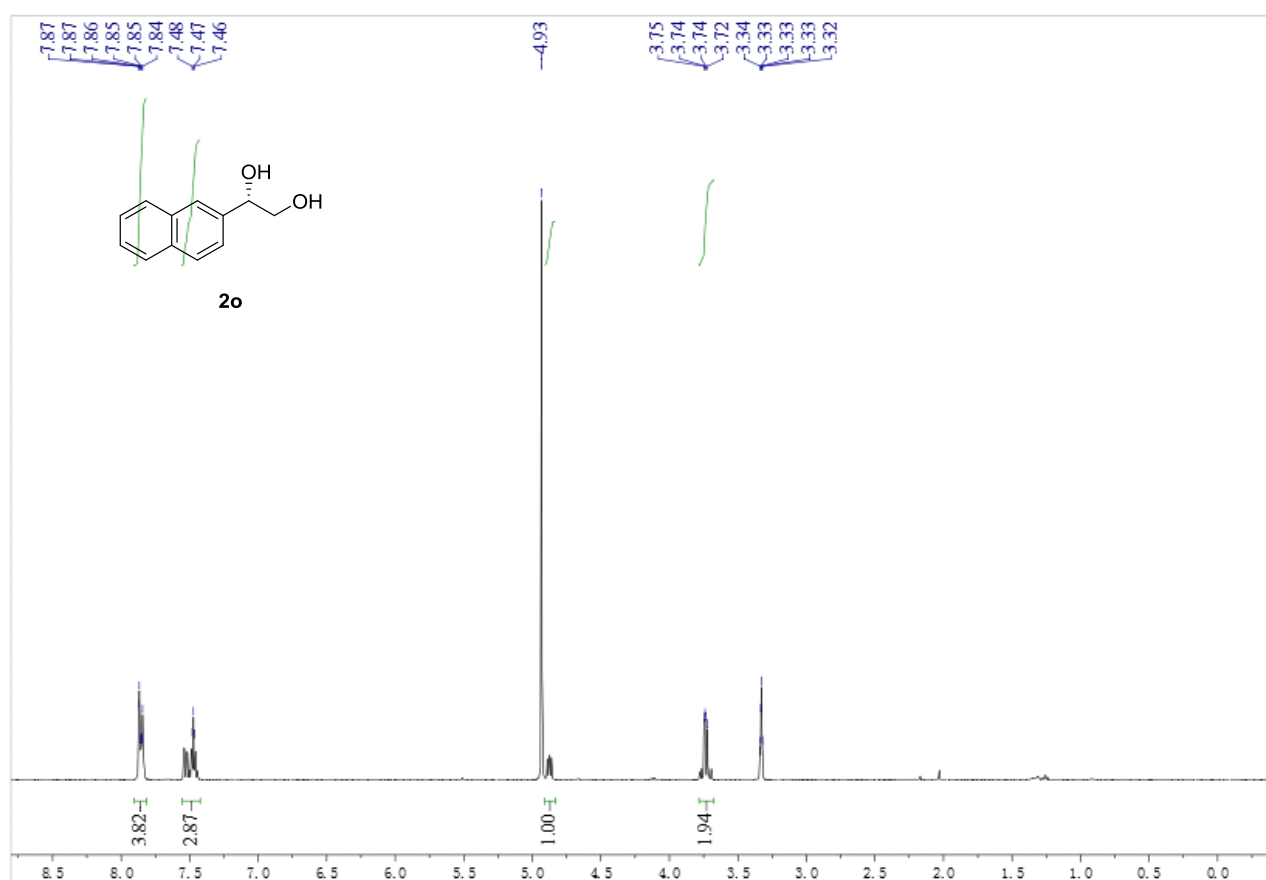

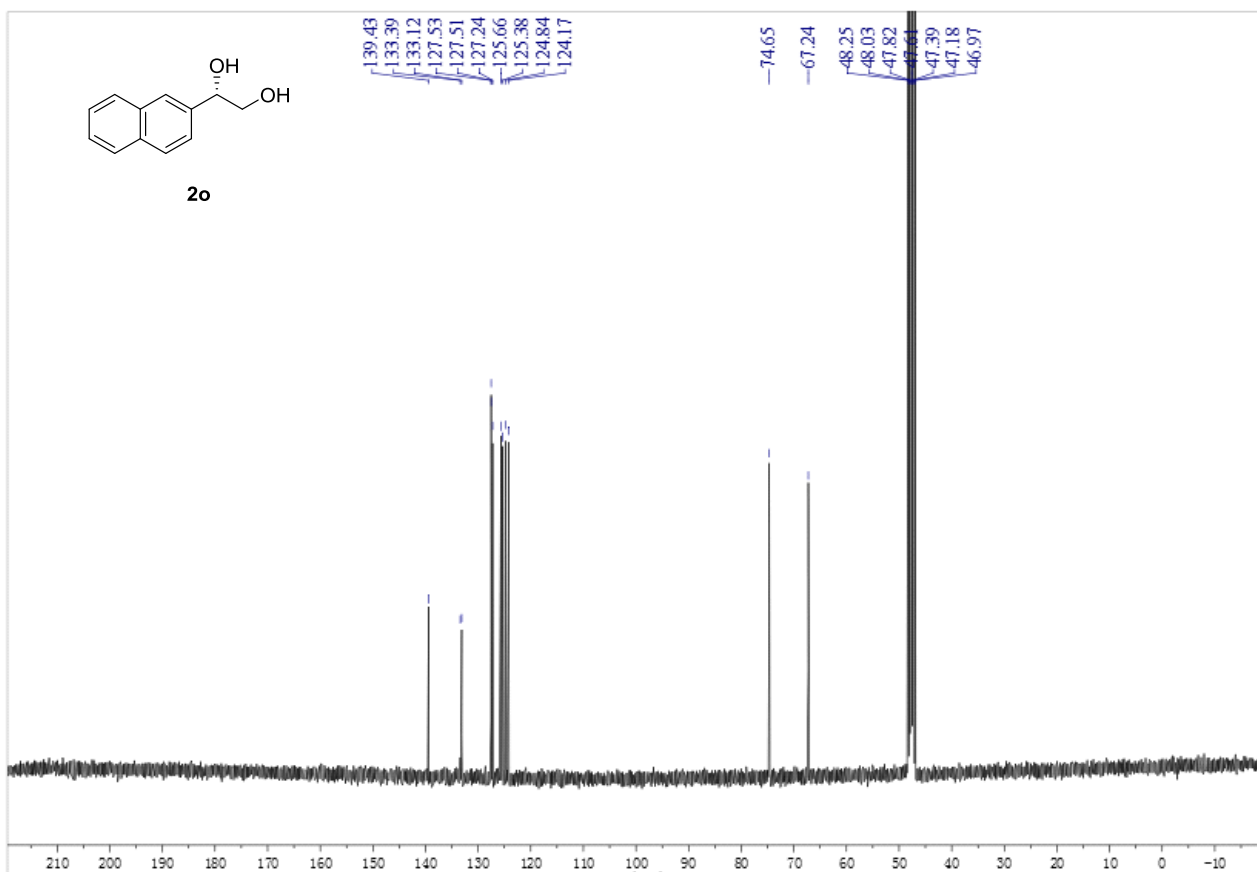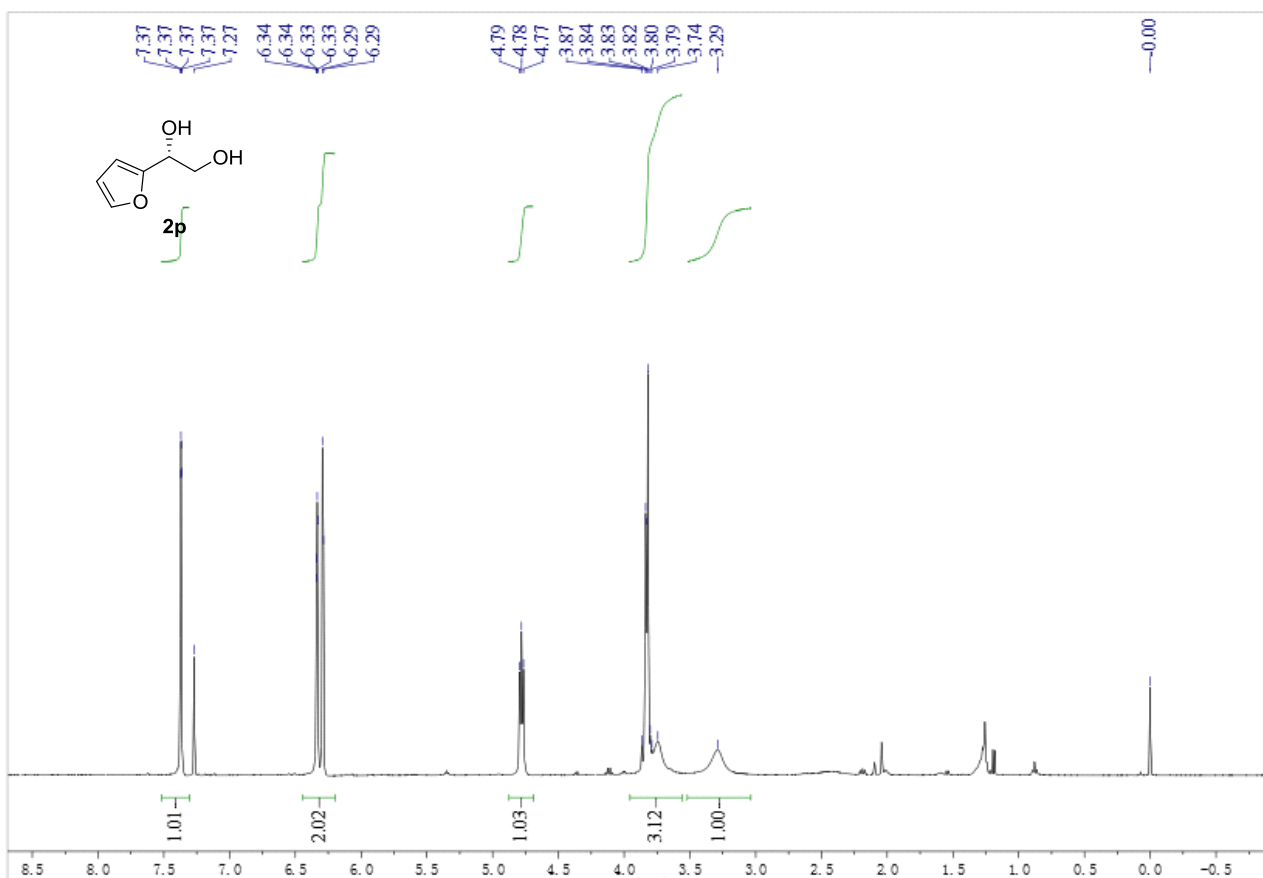

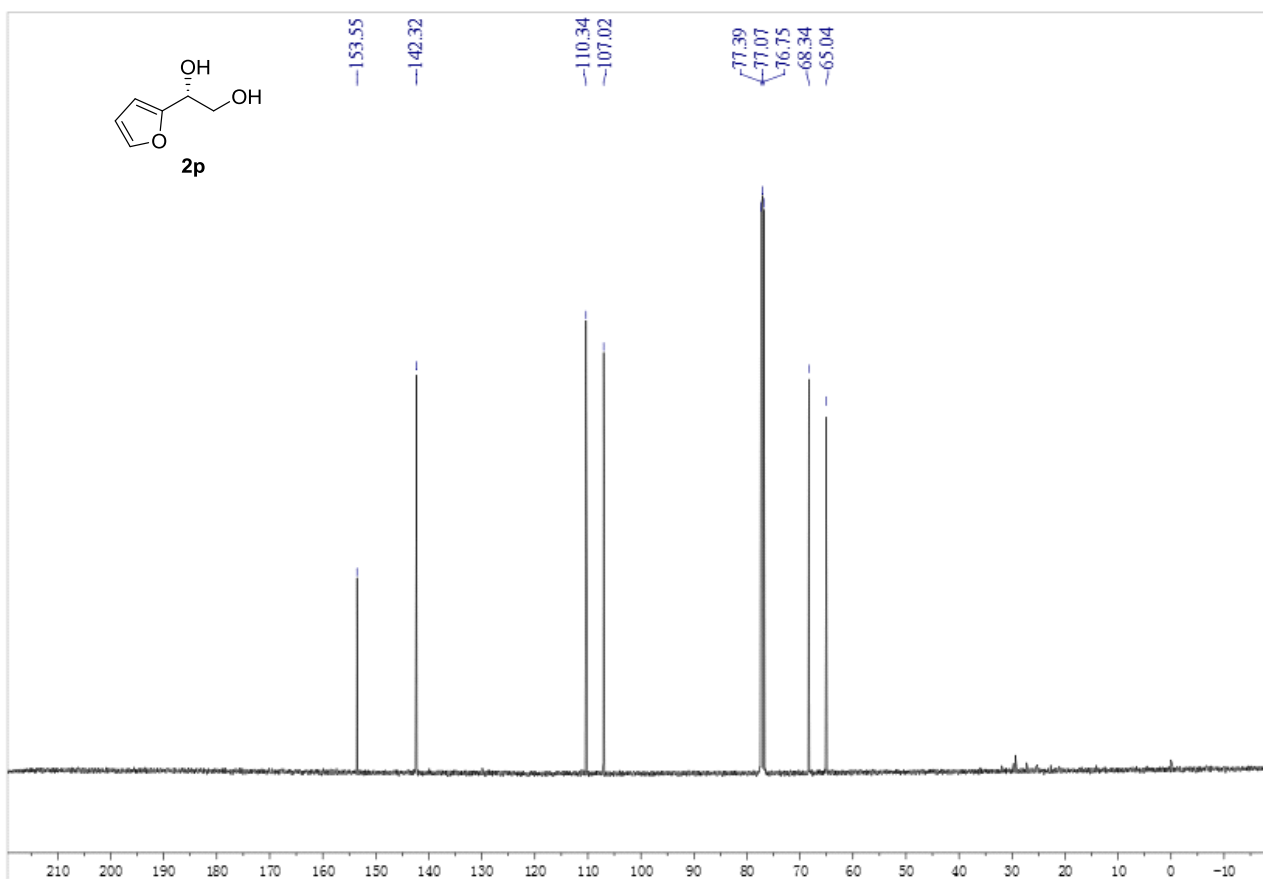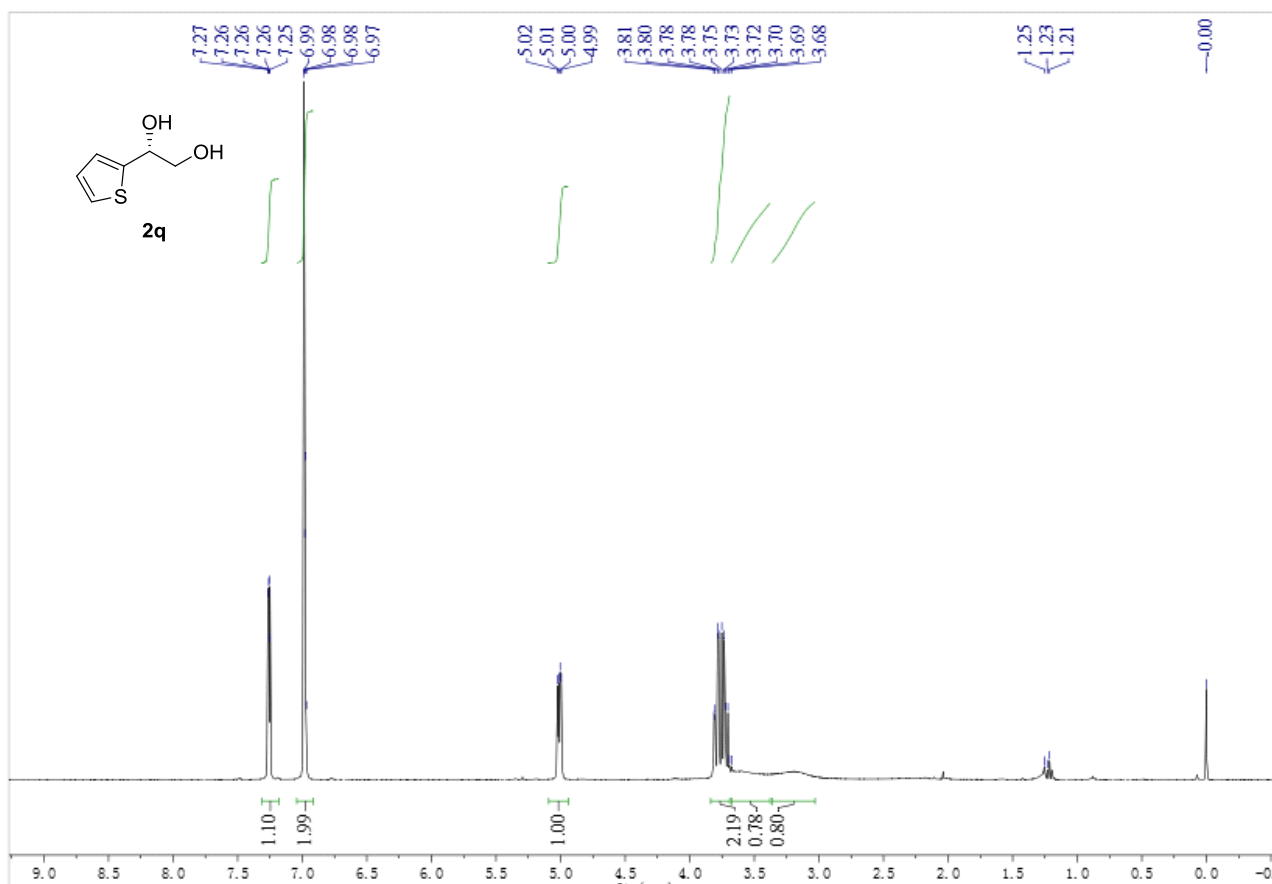

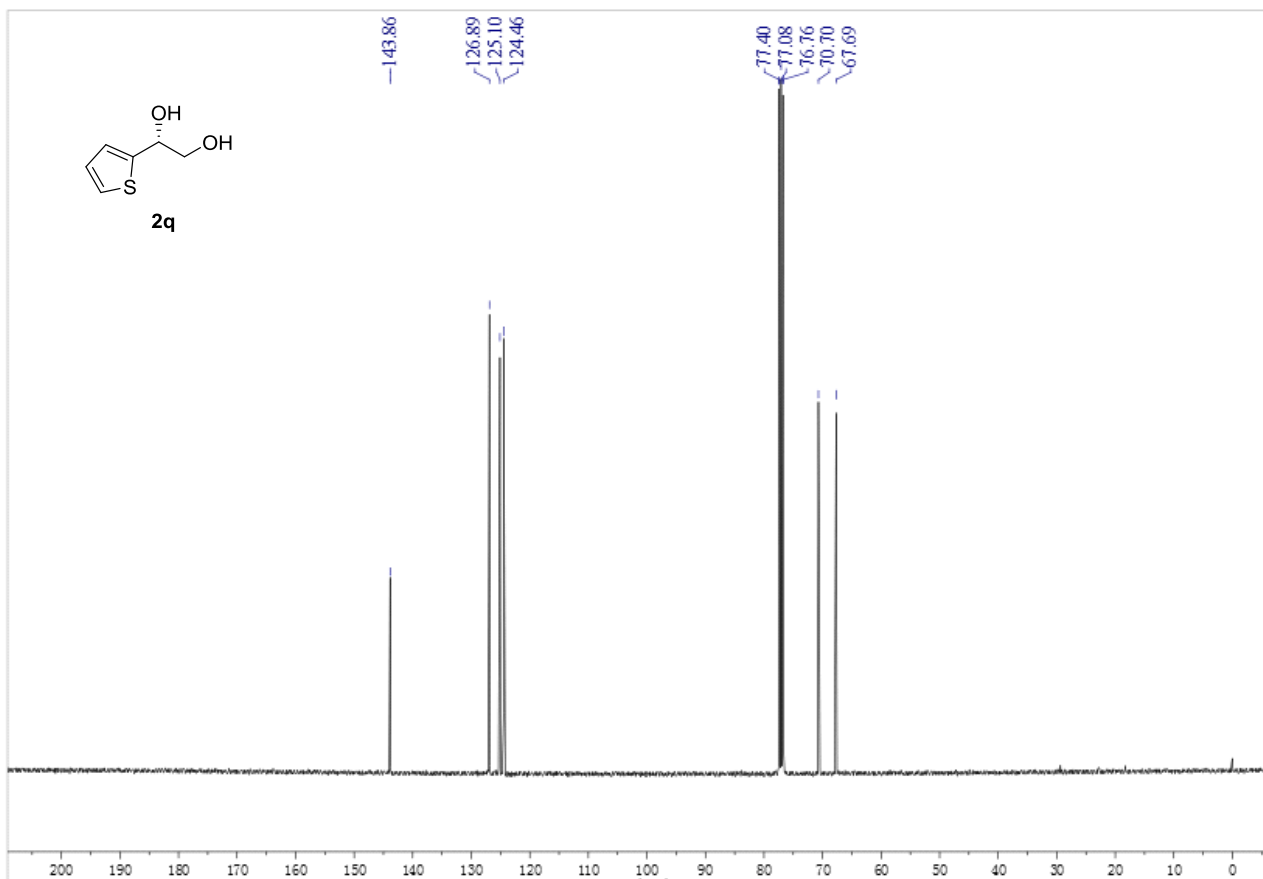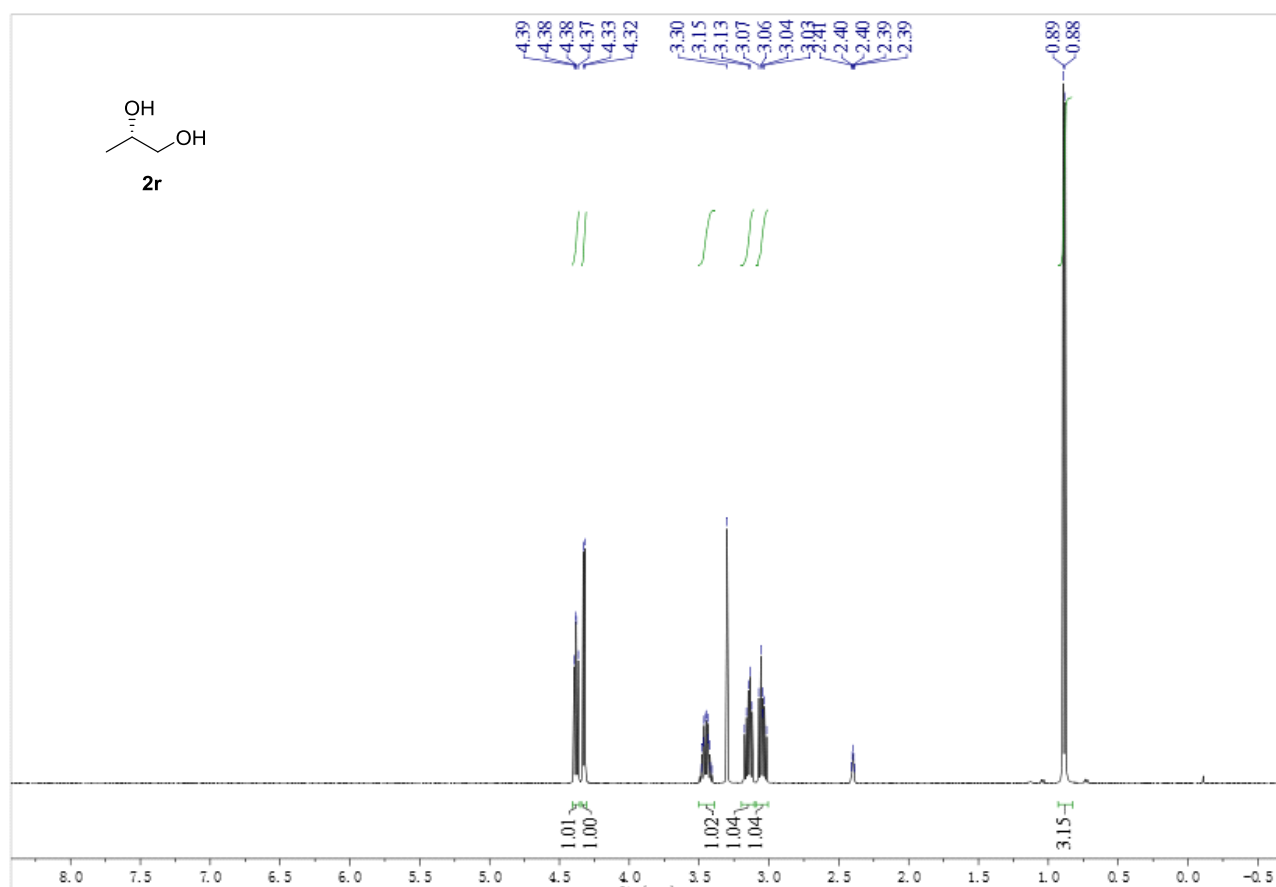



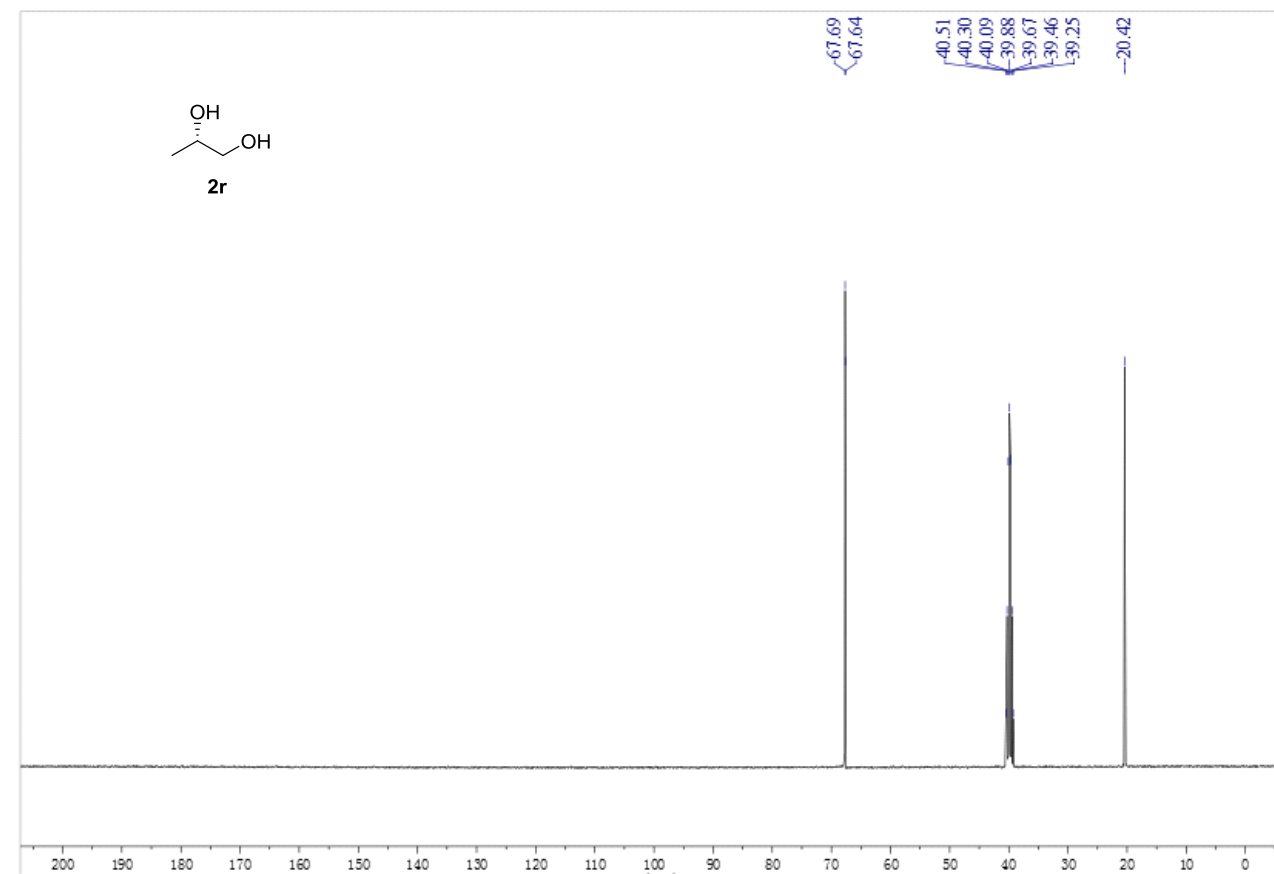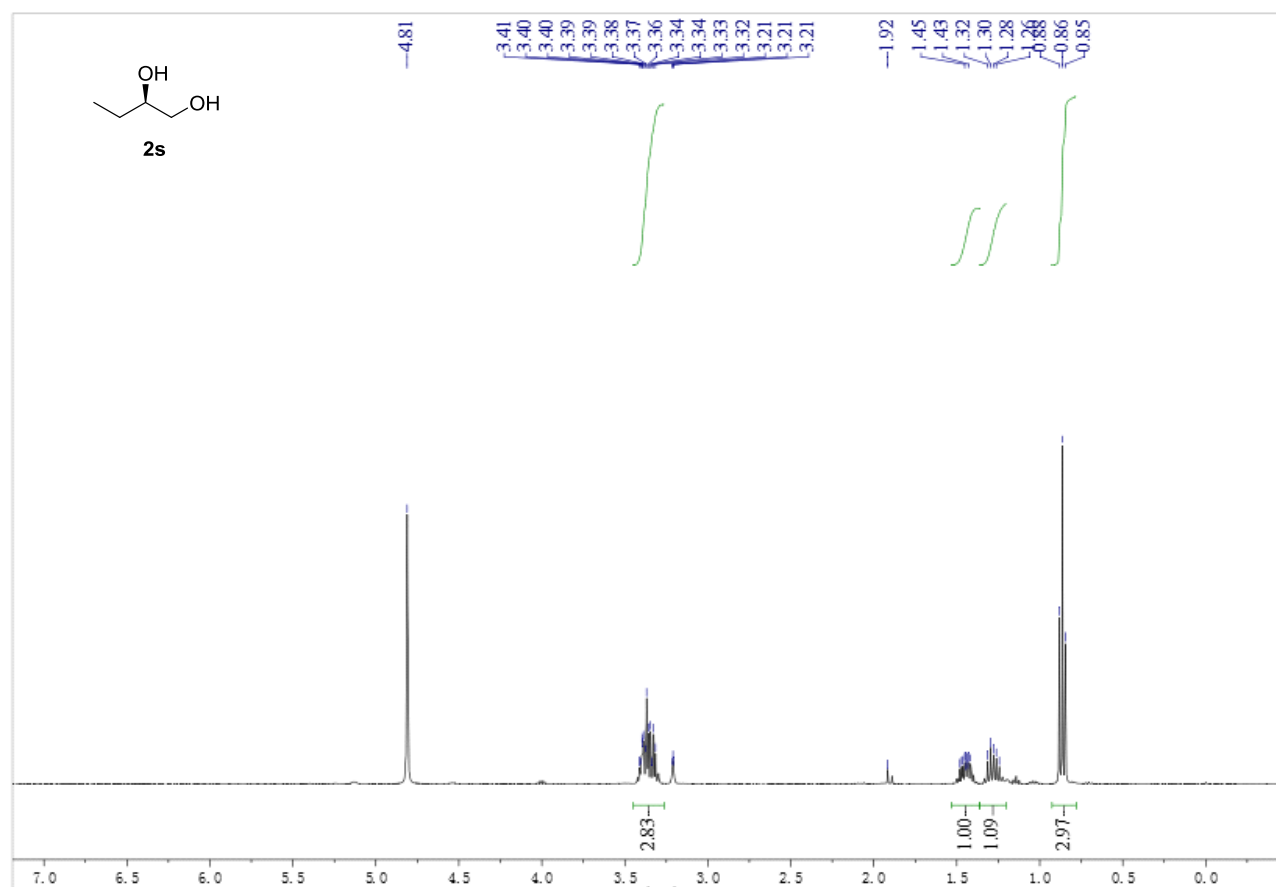

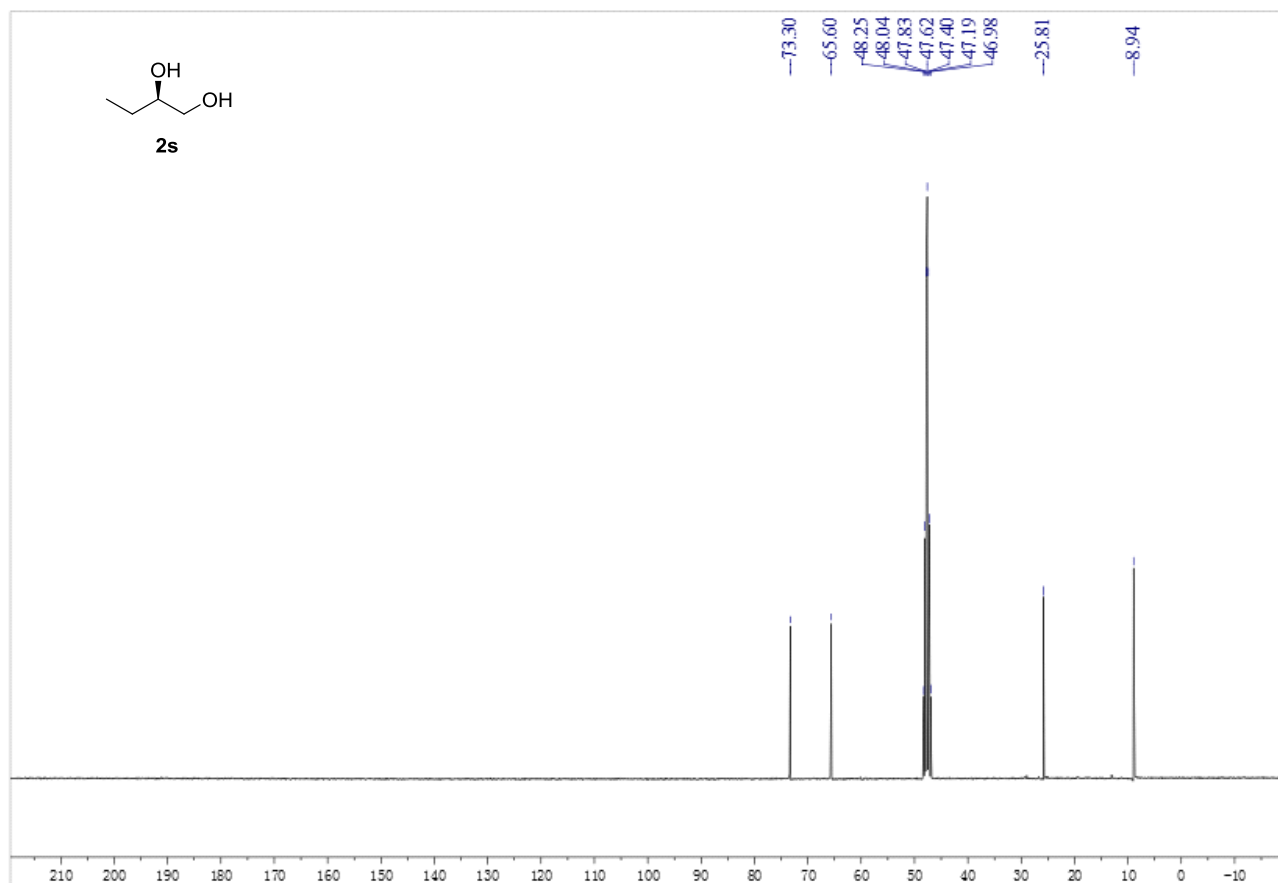

## V. References:

1. C. Joyanta, P. Susmita, R. Sujit, *J. Am. Chem. Soc.* 2005, **127**, 6162-6163.
2. D. Yang, Y. Long, H. Wang, Z. Zhang, *Org. Lett.* 2008, **10**, 4723-4726.
3. R. Moriarty, O. Prakash, *Organic Reactions*. 2004, **54**, 273-418.
4. R. Moriarty, *J. Org. Chem.* 2005, **70**, 2893-2903.
5. T. Ohkuma, N. Utsumi, M. Watanabe, K. Tsutsumi, N. Arai, K. Murata, *Org. Lett.* 2007, **9**, 2565-2567.
6. R. Kadyrov, R. Koenigs, C. Brinkmann, D. Voigtlaender, M. Rueping, *Angew. Chem. Int. Ed.* 2009, **48**, 7556-7559.
7. H. Liu, C. Dong, Z. Zhang, P. Wu, X. Jiang, *Angew. Chem. Int. Ed.* 2012, **51**, 12570-12574.
8. S. Wu, Y. Chen, Y. Xu, A. Li, Q. Xu, A. Glieder, Z. Li, *ACS Catal.* 2014, **4**, 409-420.
9. F. M. Hauser, S. R. Ellenberger, W. P. Ellenberger, *Tetrahedron Lett.* 1988, **29**, 4939-4942.
10. A. Sathish Reddy, P. Gangadhar, P. Srihari, *Tetrahedron: Asymmetry* 2013, **24**, 1524-1530.
11. J. Majer, P. Kwiatkowski, J. Jurczak, *Org. Lett.* 2009, **11**, 4636-4639.
12. S. Haubenreisser, T. H. Wöste, C. Martínez, K. Ishihara, K. Muñoz, *Angew. Chem. Int. Ed.* 2016, **55**, 413-417.
13. Y. Xu, X. Jia, S. Panke, Z. Li, *Chem. Commun.* 2009, 1481-1483.
14. S. Superchi, D. Casarini, C. Summa, C. Rosini, *J. Org. Chem.* 2004, **69**, 1685-1694.
15. A. Agarwal, S. Rani, Y. D. Vankar, *J. Org. Chem.* 2004, **69**, 6137-6140.
16. M. Okada, S. Ito, A. Matsubara, I. Iwakura, S. Egoshia, M. Ueda, *Org. Biomol. Chem.* 2009, **7**, 3065-3073.
